# Supplementary material
Source: Research Square preprint supplement (doi:10.21203/rs.3.rs-10395112/v1)
Supplement: Supplementary file 1 [file c548746491288f5552247f95.xlsx]

## Sheet: README
Piscine orthoreovirus 1: segment-resolved codon usage and host-reference analysis
Authors	Jun-Wei Yang; Cheng-Hsun Lee; Hsuan-Wei Huang; Lu-Te Chuang
Field	Value
Target journal	Virus Genes — Short Communication
Primary isolates	72
Principal CDSs	720
Core segment tests with BH q <= 0.05	11
Retrieval date	2026-07-16
Primary host reference	Atlantic salmon Salmo salar GCF_965601325.1
Host-reference sensitivity	Chinook salmon Oncorhynchus tshawytscha GCF_018296145.1
Distribution	Online Resource 1 supplied with the Virus Genes submission
Version	4.1 - final submission-ready Online Resource 1 (2026-07-17)
Corresponding author	Jun-Wei Yang; Independent Researcher; Taoyuan City, Taiwan; or0706555@gmail.com
Critical curation note
1	Public records used opposing L1/L3 source-label conventions. Canonical mapping was set by orthologous protein function: L1 = lambda 3 RNA-dependent RNA polymerase; L3 = lambda 1 core-shell protein.
2	Original source labels are preserved in Accession Manifest and Harmonization Audit. Harmonization preceded exact whole-complement deduplication and every analysis.
3	Segments are repeated measurements within isolate. Friedman statistics and 9,999 within-isolate label permutations preserve this dependence.
4	CAI, RCDI and similarity index D are host-reference similarities, not direct assays of translation efficiency or causal host adaptation; near-perfect Atlantic/Chinook rank concordance reflects the highly similar salmonid references.
5	Only five representatives remain at 99.5% whole-complement identity and three at 99%; the public data are strongly phylogenetically non-independent.
6	All 720 principal CDSs fall below the composition-only ENc-GC3s expectation; this indicates that composition alone is insufficient, not that a specific selective mechanism has been proven.
Co-corresponding author	Lu-Te Chuang; Yuanpei University of Medical Technology; Hsinchu City, Taiwan; ltchuang@mail.ypu.edu.tw
Source	URL / identifier
GenBank	https://www.ncbi.nlm.nih.gov/nuccore/
PRV genome organization	https://doi.org/10.1371/journal.pone.0070075
PRV-1 genome diversity	https://doi.org/10.1093/ve/veaa054
PRV reassortment and selection	https://doi.org/10.3390/v16040556
PRV-1 32-year analysis	https://doi.org/10.1093/ve/veaf033
Codon/host framework	https://doi.org/10.1371/journal.pone.0166260
Atlantic salmon RefSeq	GCF_965601325.1
Chinook salmon RefSeq	GCF_018296145.1

## Sheet: Accession Manifest
One row per harmonized principal CDS. Source and canonical segment labels are both retained; sequence strings are omitted from this deposit workbook but remain retrievable by accession.
Accession	Isolate	Segment Label	Segment	Source Segment Label	Segment Harmonization Basis	Host	Country	Collection Date	Bioproject	Product	Protein Id	Gene	Cds Length	Sequence Id
MT758754.1	0274	L1	1	L3	lambda3/RdRp ortholog; canonical PRV L1	Oncorhynchus tshawytscha	Canada	20-Jun-2008		lambda3	QPL20201.1		3861	MT758754.1_L1
MT758753.1	0274	L2	2	L2	source label retained	Oncorhynchus tshawytscha	Canada	20-Jun-2008		lambda2	QPL20200.1		3873	MT758753.1_L2
MT758752.1	0274	L3	3	L1	lambda1/core-shell ortholog; canonical PRV L3	Oncorhynchus tshawytscha	Canada	20-Jun-2008		lambda1	QPL20199.1		3849	MT758752.1_L3
MT758755.1	0274	M1	4	M1	source label retained	Oncorhynchus tshawytscha	Canada	20-Jun-2008		mu2	QPL20202.1		2283	MT758755.1_M1
MT758756.1	0274	M2	5	M2	source label retained	Oncorhynchus tshawytscha	Canada	20-Jun-2008		mu1	QPL20203.1		2070	MT758756.1_M2
MT758757.1	0274	M3	6	M3	source label retained	Oncorhynchus tshawytscha	Canada	20-Jun-2008		muNS	QPL20204.1		2298	MT758757.1_M3
MT758758.1	0274	S1	7	S1	source label retained	Oncorhynchus tshawytscha	Canada	20-Jun-2008		sigma3	QPL20205.1		993	MT758758.1_S1
MT758759.1	0274	S2	8	S2	source label retained	Oncorhynchus tshawytscha	Canada	20-Jun-2008		sigma2	QPL20207.1		1263	MT758759.1_S2
MT758760.1	0274	S3	9	S3	source label retained	Oncorhynchus tshawytscha	Canada	20-Jun-2008		sigmaNS	QPL20208.1		1065	MT758760.1_S3
MT758761.1	0274	S4	10	S4	source label retained	Oncorhynchus tshawytscha	Canada	20-Jun-2008		sigma1	QPL20209.1		948	MT758761.1_S4
MT758824.1	0277	L1	1	L3	lambda3/RdRp ortholog; canonical PRV L1	Oncorhynchus tshawytscha	Canada	20-Jun-2008		lambda3	QPL20278.1		3861	MT758824.1_L1
MT758823.1	0277	L2	2	L2	source label retained	Oncorhynchus tshawytscha	Canada	20-Jun-2008		lambda2	QPL20277.1		3873	MT758823.1_L2
MT758822.1	0277	L3	3	L1	lambda1/core-shell ortholog; canonical PRV L3	Oncorhynchus tshawytscha	Canada	20-Jun-2008		lambda1	QPL20276.1		3849	MT758822.1_L3
MT758825.1	0277	M1	4	M1	source label retained	Oncorhynchus tshawytscha	Canada	20-Jun-2008		mu2	QPL20279.1		2283	MT758825.1_M1
MT758826.1	0277	M2	5	M2	source label retained	Oncorhynchus tshawytscha	Canada	20-Jun-2008		mu1	QPL20280.1		2070	MT758826.1_M2
MT758827.1	0277	M3	6	M3	source label retained	Oncorhynchus tshawytscha	Canada	20-Jun-2008		muNS	QPL20281.1		2298	MT758827.1_M3
MT758828.1	0277	S1	7	S1	source label retained	Oncorhynchus tshawytscha	Canada	20-Jun-2008		sigma3	QPL20282.1		993	MT758828.1_S1
MT758829.1	0277	S2	8	S2	source label retained	Oncorhynchus tshawytscha	Canada	20-Jun-2008		sigma2	QPL20284.1		1263	MT758829.1_S2
MT758830.1	0277	S3	9	S3	source label retained	Oncorhynchus tshawytscha	Canada	20-Jun-2008		sigmaNS	QPL20285.1		1065	MT758830.1_S3
MT758831.1	0277	S4	10	S4	source label retained	Oncorhynchus tshawytscha	Canada	20-Jun-2008		sigma1	QPL20286.1		948	MT758831.1_S4
MT758734.1	0314	L1	1	L3	lambda3/RdRp ortholog; canonical PRV L1	Oncorhynchus tshawytscha	Canada	21-Jun-2008		lambda3	QPL20179.1		3861	MT758734.1_L1
MT758733.1	0314	L2	2	L2	source label retained	Oncorhynchus tshawytscha	Canada	21-Jun-2008		lambda2	QPL20178.1		3873	MT758733.1_L2
MT758732.1	0314	L3	3	L1	lambda1/core-shell ortholog; canonical PRV L3	Oncorhynchus tshawytscha	Canada	21-Jun-2008		lambda1	QPL20177.1		3849	MT758732.1_L3
MT758735.1	0314	M1	4	M1	source label retained	Oncorhynchus tshawytscha	Canada	21-Jun-2008		mu2	QPL20180.1		2283	MT758735.1_M1
MT758736.1	0314	M2	5	M2	source label retained	Oncorhynchus tshawytscha	Canada	21-Jun-2008		mu1	QPL20181.1		2070	MT758736.1_M2
MT758737.1	0314	M3	6	M3	source label retained	Oncorhynchus tshawytscha	Canada	21-Jun-2008		muNS	QPL20182.1		2298	MT758737.1_M3
MT758738.1	0314	S1	7	S1	source label retained	Oncorhynchus tshawytscha	Canada	21-Jun-2008		sigma3	QPL20183.1		993	MT758738.1_S1
MT758739.1	0314	S2	8	S2	source label retained	Oncorhynchus tshawytscha	Canada	21-Jun-2008		sigma2	QPL20185.1		1263	MT758739.1_S2
MT758740.1	0314	S3	9	S3	source label retained	Oncorhynchus tshawytscha	Canada	21-Jun-2008		sigmaNS	QPL20186.1		1065	MT758740.1_S3
MT758741.1	0314	S4	10	S4	source label retained	Oncorhynchus tshawytscha	Canada	21-Jun-2008		sigma1	QPL20187.1		948	MT758741.1_S4
MT758984.1	0456	L1	1	L3	lambda3/RdRp ortholog; canonical PRV L1	Oncorhynchus tshawytscha	Canada	01-Jul-2008		lambda3	QPL20454.1		3861	MT758984.1_L1
MT758983.1	0456	L2	2	L2	source label retained	Oncorhynchus tshawytscha	Canada	01-Jul-2008		lambda2	QPL20453.1		3873	MT758983.1_L2
MT758982.1	0456	L3	3	L1	lambda1/core-shell ortholog; canonical PRV L3	Oncorhynchus tshawytscha	Canada	01-Jul-2008		lambda1	QPL20452.1		3849	MT758982.1_L3
MT758985.1	0456	M1	4	M1	source label retained	Oncorhynchus tshawytscha	Canada	01-Jul-2008		mu2	QPL20455.1		2283	MT758985.1_M1
MT758986.1	0456	M2	5	M2	source label retained	Oncorhynchus tshawytscha	Canada	01-Jul-2008		mu1	QPL20456.1		2070	MT758986.1_M2
MT758987.1	0456	M3	6	M3	source label retained	Oncorhynchus tshawytscha	Canada	01-Jul-2008		muNS	QPL20457.1		2298	MT758987.1_M3
MT758988.1	0456	S1	7	S1	source label retained	Oncorhynchus tshawytscha	Canada	01-Jul-2008		sigma3	QPL20458.1		993	MT758988.1_S1
MT758989.1	0456	S2	8	S2	source label retained	Oncorhynchus tshawytscha	Canada	01-Jul-2008		sigma2	QPL20460.1		1263	MT758989.1_S2
MT758990.1	0456	S3	9	S3	source label retained	Oncorhynchus tshawytscha	Canada	01-Jul-2008		sigmaNS	QPL20461.1		1065	MT758990.1_S3
MT758991.1	0456	S4	10	S4	source label retained	Oncorhynchus tshawytscha	Canada	01-Jul-2008		sigma1	QPL20462.1		948	MT758991.1_S4
KR337473.1	050607	L1	1	L1	lambda3/RdRp ortholog; canonical PRV L1	Salmo salar	Norway	05-Jun-2007		lambda 3 protein	AKI88492.1		3861	KR337473.1_L1
KR337474.1	050607	L2	2	L2	source label retained	Salmo salar	Norway	05-Jun-2007		lambda 2 protein	AKI88493.1		3873	KR337474.1_L2
KR337475.1	050607	L3	3	L3	lambda1/core-shell ortholog; canonical PRV L3	Salmo salar	Norway	05-Jun-2007		lambda 1 protein	AKI88494.1		3849	KR337475.1_L3
KR337476.1	050607	M1	4	M1	source label retained	Salmo salar	Norway	05-Jun-2007		mu 2 protein	AKI88495.1		2283	KR337476.1_M1
KR337477.1	050607	M2	5	M2	source label retained	Salmo salar	Norway	05-Jun-2007		mu 1 protein	AKI88496.1		2064	KR337477.1_M2
KR337478.1	050607	M3	6	M3	source label retained	Salmo salar	Norway	05-Jun-2007		mu NS protein	AKI88497.1		2259	KR337478.1_M3
KR337479.1	050607	S1	7	S1	source label retained	Salmo salar	Norway	05-Jun-2007		sigma 3 protein	AKI88498.1		993	KR337479.1_S1
KR337480.1	050607	S2	8	S2	source label retained	Salmo salar	Norway	05-Jun-2007		sigma 2 protein	AKI88500.1		1263	KR337480.1_S2
KR337481.1	050607	S3	9	S3	source label retained	Salmo salar	Norway	05-Jun-2007		sigma NS protein	AKI88501.1		1065	KR337481.1_S3
KR337482.1	050607	S4	10	S4	source label retained	Salmo salar	Norway	05-Jun-2007		sigma 1 protein	AKI88502.1		948	KR337482.1_S4
MT758774.1	3572	L1	1	L3	lambda3/RdRp ortholog; canonical PRV L1	Oncorhynchus tshawytscha	Canada	18-Oct-2009		lambda3	QPL20223.1		3861	MT758774.1_L1
MT758773.1	3572	L2	2	L2	source label retained	Oncorhynchus tshawytscha	Canada	18-Oct-2009		lambda2	QPL20222.1		3873	MT758773.1_L2
MT758772.1	3572	L3	3	L1	lambda1/core-shell ortholog; canonical PRV L3	Oncorhynchus tshawytscha	Canada	18-Oct-2009		lambda1	QPL20221.1		3849	MT758772.1_L3
MT758775.1	3572	M1	4	M1	source label retained	Oncorhynchus tshawytscha	Canada	18-Oct-2009		mu2	QPL20224.1		2283	MT758775.1_M1
MT758776.1	3572	M2	5	M2	source label retained	Oncorhynchus tshawytscha	Canada	18-Oct-2009		mu1	QPL20225.1		2070	MT758776.1_M2
MT758777.1	3572	M3	6	M3	source label retained	Oncorhynchus tshawytscha	Canada	18-Oct-2009		muNS	QPL20226.1		2298	MT758777.1_M3
MT758778.1	3572	S1	7	S1	source label retained	Oncorhynchus tshawytscha	Canada	18-Oct-2009		sigma3	QPL20227.1		993	MT758778.1_S1
MT758779.1	3572	S2	8	S2	source label retained	Oncorhynchus tshawytscha	Canada	18-Oct-2009		sigma2	QPL20229.1		1263	MT758779.1_S2
MT758780.1	3572	S3	9	S3	source label retained	Oncorhynchus tshawytscha	Canada	18-Oct-2009		sigmaNS	QPL20230.1		1065	MT758780.1_S3
MT758781.1	3572	S4	10	S4	source label retained	Oncorhynchus tshawytscha	Canada	18-Oct-2009		sigma1	QPL20231.1		948	MT758781.1_S4
MT759134.1	4255	L1	1	L3	lambda3/RdRp ortholog; canonical PRV L1	Oncorhynchus tshawytscha	Canada	22-Feb-2010		lambda3	QPL20619.1		3861	MT759134.1_L1
MT759133.1	4255	L2	2	L2	source label retained	Oncorhynchus tshawytscha	Canada	22-Feb-2010		lambda2	QPL20618.1		3873	MT759133.1_L2
MT759132.1	4255	L3	3	L1	lambda1/core-shell ortholog; canonical PRV L3	Oncorhynchus tshawytscha	Canada	22-Feb-2010		lambda1	QPL20617.1		3849	MT759132.1_L3
MT759135.1	4255	M1	4	M1	source label retained	Oncorhynchus tshawytscha	Canada	22-Feb-2010		mu2	QPL20620.1		2283	MT759135.1_M1
MT759136.1	4255	M2	5	M2	source label retained	Oncorhynchus tshawytscha	Canada	22-Feb-2010		mu1	QPL20621.1		2070	MT759136.1_M2
MT759137.1	4255	M3	6	M3	source label retained	Oncorhynchus tshawytscha	Canada	22-Feb-2010		muNS	QPL20622.1		2298	MT759137.1_M3
MT759138.1	4255	S1	7	S1	source label retained	Oncorhynchus tshawytscha	Canada	22-Feb-2010		sigma3	QPL20623.1		993	MT759138.1_S1
MT759139.1	4255	S2	8	S2	source label retained	Oncorhynchus tshawytscha	Canada	22-Feb-2010		sigma2	QPL20625.1		1263	MT759139.1_S2
MT759140.1	4255	S3	9	S3	source label retained	Oncorhynchus tshawytscha	Canada	22-Feb-2010		sigmaNS	QPL20626.1		1065	MT759140.1_S3
MT759141.1	4255	S4	10	S4	source label retained	Oncorhynchus tshawytscha	Canada	22-Feb-2010		sigma1	QPL20627.1		948	MT759141.1_S4
MT759144.1	4256	L1	1	L3	lambda3/RdRp ortholog; canonical PRV L1	Oncorhynchus tshawytscha	Canada	22-Feb-2010		lambda3	QPL20630.1		3861	MT759144.1_L1
MT759143.1	4256	L2	2	L2	source label retained	Oncorhynchus tshawytscha	Canada	22-Feb-2010		lambda2	QPL20629.1		3873	MT759143.1_L2
MT759142.1	4256	L3	3	L1	lambda1/core-shell ortholog; canonical PRV L3	Oncorhynchus tshawytscha	Canada	22-Feb-2010		lambda1	QPL20628.1		3849	MT759142.1_L3
MT759145.1	4256	M1	4	M1	source label retained	Oncorhynchus tshawytscha	Canada	22-Feb-2010		mu2	QPL20631.1		2283	MT759145.1_M1
MT759146.1	4256	M2	5	M2	source label retained	Oncorhynchus tshawytscha	Canada	22-Feb-2010		mu1	QPL20632.1		2070	MT759146.1_M2
MT759147.1	4256	M3	6	M3	source label retained	Oncorhynchus tshawytscha	Canada	22-Feb-2010		muNS	QPL20633.1		2298	MT759147.1_M3
MT759148.1	4256	S1	7	S1	source label retained	Oncorhynchus tshawytscha	Canada	22-Feb-2010		sigma3	QPL20634.1		993	MT759148.1_S1
MT759149.1	4256	S2	8	S2	source label retained	Oncorhynchus tshawytscha	Canada	22-Feb-2010		sigma2	QPL20636.1		1263	MT759149.1_S2
MT759150.1	4256	S3	9	S3	source label retained	Oncorhynchus tshawytscha	Canada	22-Feb-2010		sigmaNS	QPL20637.1		1065	MT759150.1_S3
MT759151.1	4256	S4	10	S4	source label retained	Oncorhynchus tshawytscha	Canada	22-Feb-2010		sigma1	QPL20638.1		948	MT759151.1_S4
MT759154.1	4299	L1	1	L3	lambda3/RdRp ortholog; canonical PRV L1	Oncorhynchus tshawytscha	Canada	25-Feb-2010		lambda3	QPL20641.1		3861	MT759154.1_L1
MT759153.1	4299	L2	2	L2	source label retained	Oncorhynchus tshawytscha	Canada	25-Feb-2010		lambda2	QPL20640.1		3873	MT759153.1_L2
MT759152.1	4299	L3	3	L1	lambda1/core-shell ortholog; canonical PRV L3	Oncorhynchus tshawytscha	Canada	25-Feb-2010		lambda1	QPL20639.1		3849	MT759152.1_L3
MT759155.1	4299	M1	4	M1	source label retained	Oncorhynchus tshawytscha	Canada	25-Feb-2010		mu2	QPL20642.1		2283	MT759155.1_M1
MT759156.1	4299	M2	5	M2	source label retained	Oncorhynchus tshawytscha	Canada	25-Feb-2010		mu1	QPL20643.1		2070	MT759156.1_M2
MT759157.1	4299	M3	6	M3	source label retained	Oncorhynchus tshawytscha	Canada	25-Feb-2010		muNS	QPL20644.1		2298	MT759157.1_M3
MT759158.1	4299	S1	7	S1	source label retained	Oncorhynchus tshawytscha	Canada	25-Feb-2010		sigma3	QPL20645.1		993	MT759158.1_S1
MT759159.1	4299	S2	8	S2	source label retained	Oncorhynchus tshawytscha	Canada	25-Feb-2010		sigma2	QPL20647.1		1263	MT759159.1_S2
MT759160.1	4299	S3	9	S3	source label retained	Oncorhynchus tshawytscha	Canada	25-Feb-2010		sigmaNS	QPL20648.1		1065	MT759160.1_S3
MT759161.1	4299	S4	10	S4	source label retained	Oncorhynchus tshawytscha	Canada	25-Feb-2010		sigma1	QPL20649.1		948	MT759161.1_S4
MT759164.1	4302	L1	1	L3	lambda3/RdRp ortholog; canonical PRV L1	Oncorhynchus tshawytscha	Canada	25-Feb-2010		lambda3	QPL20652.1		3861	MT759164.1_L1
MT759163.1	4302	L2	2	L2	source label retained	Oncorhynchus tshawytscha	Canada	25-Feb-2010		lambda2	QPL20651.1		3873	MT759163.1_L2
MT759162.1	4302	L3	3	L1	lambda1/core-shell ortholog; canonical PRV L3	Oncorhynchus tshawytscha	Canada	25-Feb-2010		lambda1	QPL20650.1		3849	MT759162.1_L3
MT759165.1	4302	M1	4	M1	source label retained	Oncorhynchus tshawytscha	Canada	25-Feb-2010		mu2	QPL20653.1		2283	MT759165.1_M1
MT759166.1	4302	M2	5	M2	source label retained	Oncorhynchus tshawytscha	Canada	25-Feb-2010		mu1	QPL20654.1		2070	MT759166.1_M2
MT759167.1	4302	M3	6	M3	source label retained	Oncorhynchus tshawytscha	Canada	25-Feb-2010		muNS	QPL20655.1		2298	MT759167.1_M3
MT759168.1	4302	S1	7	S1	source label retained	Oncorhynchus tshawytscha	Canada	25-Feb-2010		sigma3	QPL20656.1		993	MT759168.1_S1
MT759169.1	4302	S2	8	S2	source label retained	Oncorhynchus tshawytscha	Canada	25-Feb-2010		sigma2	QPL20658.1		1263	MT759169.1_S2
MT759170.1	4302	S3	9	S3	source label retained	Oncorhynchus tshawytscha	Canada	25-Feb-2010		sigmaNS	QPL20659.1		1065	MT759170.1_S3
MT759171.1	4302	S4	10	S4	source label retained	Oncorhynchus tshawytscha	Canada	25-Feb-2010		sigma1	QPL20660.1		948	MT759171.1_S4
MT759174.1	4335	L1	1	L3	lambda3/RdRp ortholog; canonical PRV L1	Oncorhynchus tshawytscha	Canada	28-Feb-2010		lambda3	QPL20663.1		3861	MT759174.1_L1
MT759173.1	4335	L2	2	L2	source label retained	Oncorhynchus tshawytscha	Canada	28-Feb-2010		lambda2	QPL20662.1		3873	MT759173.1_L2
MT759172.1	4335	L3	3	L1	lambda1/core-shell ortholog; canonical PRV L3	Oncorhynchus tshawytscha	Canada	28-Feb-2010		lambda1	QPL20661.1		3849	MT759172.1_L3
MT759175.1	4335	M1	4	M1	source label retained	Oncorhynchus tshawytscha	Canada	28-Feb-2010		mu2	QPL20664.1		2283	MT759175.1_M1
MT759176.1	4335	M2	5	M2	source label retained	Oncorhynchus tshawytscha	Canada	28-Feb-2010		mu1	QPL20665.1		2070	MT759176.1_M2
MT759177.1	4335	M3	6	M3	source label retained	Oncorhynchus tshawytscha	Canada	28-Feb-2010		muNS	QPL20666.1		2298	MT759177.1_M3
MT759178.1	4335	S1	7	S1	source label retained	Oncorhynchus tshawytscha	Canada	28-Feb-2010		sigma3	QPL20667.1		993	MT759178.1_S1
MT759179.1	4335	S2	8	S2	source label retained	Oncorhynchus tshawytscha	Canada	28-Feb-2010		sigma2	QPL20669.1		1263	MT759179.1_S2
MT759180.1	4335	S3	9	S3	source label retained	Oncorhynchus tshawytscha	Canada	28-Feb-2010		sigmaNS	QPL20670.1		1065	MT759180.1_S3
MT759181.1	4335	S4	10	S4	source label retained	Oncorhynchus tshawytscha	Canada	28-Feb-2010		sigma1	QPL20671.1		948	MT759181.1_S4
MT758764.1	5740	L1	1	L3	lambda3/RdRp ortholog; canonical PRV L1	Oncorhynchus tshawytscha	Canada	17-Jun-2010		lambda3	QPL20212.1		3861	MT758764.1_L1
MT758763.1	5740	L2	2	L2	source label retained	Oncorhynchus tshawytscha	Canada	17-Jun-2010		lambda2	QPL20211.1		3873	MT758763.1_L2
MT758762.1	5740	L3	3	L1	lambda1/core-shell ortholog; canonical PRV L3	Oncorhynchus tshawytscha	Canada	17-Jun-2010		lambda1	QPL20210.1		3849	MT758762.1_L3
MT758765.1	5740	M1	4	M1	source label retained	Oncorhynchus tshawytscha	Canada	17-Jun-2010		mu2	QPL20213.1		2283	MT758765.1_M1
MT758766.1	5740	M2	5	M2	source label retained	Oncorhynchus tshawytscha	Canada	17-Jun-2010		mu1	QPL20214.1		2070	MT758766.1_M2
MT758767.1	5740	M3	6	M3	source label retained	Oncorhynchus tshawytscha	Canada	17-Jun-2010		muNS	QPL20215.1		2298	MT758767.1_M3
MT758768.1	5740	S1	7	S1	source label retained	Oncorhynchus tshawytscha	Canada	17-Jun-2010		sigma3	QPL20216.1		993	MT758768.1_S1
MT758769.1	5740	S2	8	S2	source label retained	Oncorhynchus tshawytscha	Canada	17-Jun-2010		sigma2	QPL20218.1		1263	MT758769.1_S2
MT758770.1	5740	S3	9	S3	source label retained	Oncorhynchus tshawytscha	Canada	17-Jun-2010		sigmaNS	QPL20219.1		1065	MT758770.1_S3
MT758771.1	5740	S4	10	S4	source label retained	Oncorhynchus tshawytscha	Canada	17-Jun-2010		sigma1	QPL20220.1		948	MT758771.1_S4
MT758974.1	5814	L1	1	L3	lambda3/RdRp ortholog; canonical PRV L1	Oncorhynchus tshawytscha	Canada	22-Jun-2010		lambda3	QPL20443.1		3861	MT758974.1_L1
MT758973.1	5814	L2	2	L2	source label retained	Oncorhynchus tshawytscha	Canada	22-Jun-2010		lambda2	QPL20442.1		3873	MT758973.1_L2
MT758972.1	5814	L3	3	L1	lambda1/core-shell ortholog; canonical PRV L3	Oncorhynchus tshawytscha	Canada	22-Jun-2010		lambda1	QPL20441.1		3849	MT758972.1_L3
MT758975.1	5814	M1	4	M1	source label retained	Oncorhynchus tshawytscha	Canada	22-Jun-2010		mu2	QPL20444.1		2283	MT758975.1_M1
MT758976.1	5814	M2	5	M2	source label retained	Oncorhynchus tshawytscha	Canada	22-Jun-2010		mu1	QPL20445.1		2070	MT758976.1_M2
MT758977.1	5814	M3	6	M3	source label retained	Oncorhynchus tshawytscha	Canada	22-Jun-2010		muNS	QPL20446.1		2298	MT758977.1_M3
MT758978.1	5814	S1	7	S1	source label retained	Oncorhynchus tshawytscha	Canada	22-Jun-2010		sigma3	QPL20447.1		993	MT758978.1_S1
MT758979.1	5814	S2	8	S2	source label retained	Oncorhynchus tshawytscha	Canada	22-Jun-2010		sigma2	QPL20449.1		1263	MT758979.1_S2
MT758980.1	5814	S3	9	S3	source label retained	Oncorhynchus tshawytscha	Canada	22-Jun-2010		sigmaNS	QPL20450.1		1065	MT758980.1_S3
MT758981.1	5814	S4	10	S4	source label retained	Oncorhynchus tshawytscha	Canada	22-Jun-2010		sigma1	QPL20451.1		948	MT758981.1_S4
MT758844.1	7114	L1	1	L3	lambda3/RdRp ortholog; canonical PRV L1	Oncorhynchus tshawytscha	Canada	12-Nov-2010		lambda3	QPL20300.1		3861	MT758844.1_L1
MT758843.1	7114	L2	2	L2	source label retained	Oncorhynchus tshawytscha	Canada	12-Nov-2010		lambda2	QPL20299.1		3873	MT758843.1_L2
MT758842.1	7114	L3	3	L1	lambda1/core-shell ortholog; canonical PRV L3	Oncorhynchus tshawytscha	Canada	12-Nov-2010		lambda1	QPL20298.1		3849	MT758842.1_L3
MT758845.1	7114	M1	4	M1	source label retained	Oncorhynchus tshawytscha	Canada	12-Nov-2010		mu2	QPL20301.1		2283	MT758845.1_M1
MT758846.1	7114	M2	5	M2	source label retained	Oncorhynchus tshawytscha	Canada	12-Nov-2010		mu1	QPL20302.1		2070	MT758846.1_M2
MT758847.1	7114	M3	6	M3	source label retained	Oncorhynchus tshawytscha	Canada	12-Nov-2010		muNS	QPL20303.1		2298	MT758847.1_M3
MT758848.1	7114	S1	7	S1	source label retained	Oncorhynchus tshawytscha	Canada	12-Nov-2010		sigma3	QPL20304.1		993	MT758848.1_S1
MT758849.1	7114	S2	8	S2	source label retained	Oncorhynchus tshawytscha	Canada	12-Nov-2010		sigma2	QPL20306.1		1263	MT758849.1_S2
MT758850.1	7114	S3	9	S3	source label retained	Oncorhynchus tshawytscha	Canada	12-Nov-2010		sigmaNS	QPL20307.1		1065	MT758850.1_S3
MT758851.1	7114	S4	10	S4	source label retained	Oncorhynchus tshawytscha	Canada	12-Nov-2010		sigma1	QPL20308.1		948	MT758851.1_S4
MT758864.1	7117	L1	1	L3	lambda3/RdRp ortholog; canonical PRV L1	Oncorhynchus tshawytscha	Canada	12-Nov-2010		lambda3	QPL20322.1		3861	MT758864.1_L1
MT758863.1	7117	L2	2	L2	source label retained	Oncorhynchus tshawytscha	Canada	12-Nov-2010		lambda2	QPL20321.1		3873	MT758863.1_L2
MT758862.1	7117	L3	3	L1	lambda1/core-shell ortholog; canonical PRV L3	Oncorhynchus tshawytscha	Canada	12-Nov-2010		lambda1	QPL20320.1		3849	MT758862.1_L3
MT758865.1	7117	M1	4	M1	source label retained	Oncorhynchus tshawytscha	Canada	12-Nov-2010		mu2	QPL20323.1		2283	MT758865.1_M1
MT758866.1	7117	M2	5	M2	source label retained	Oncorhynchus tshawytscha	Canada	12-Nov-2010		mu1	QPL20324.1		2070	MT758866.1_M2
MT758867.1	7117	M3	6	M3	source label retained	Oncorhynchus tshawytscha	Canada	12-Nov-2010		muNS	QPL20325.1		2298	MT758867.1_M3
MT758868.1	7117	S1	7	S1	source label retained	Oncorhynchus tshawytscha	Canada	12-Nov-2010		sigma3	QPL20326.1		993	MT758868.1_S1
MT758869.1	7117	S2	8	S2	source label retained	Oncorhynchus tshawytscha	Canada	12-Nov-2010		sigma2	QPL20328.1		1263	MT758869.1_S2
MT758870.1	7117	S3	9	S3	source label retained	Oncorhynchus tshawytscha	Canada	12-Nov-2010		sigmaNS	QPL20329.1		1065	MT758870.1_S3
MT758871.1	7117	S4	10	S4	source label retained	Oncorhynchus tshawytscha	Canada	12-Nov-2010		sigma1	QPL20330.1		948	MT758871.1_S4
MT758834.1	7230	L1	1	L3	lambda3/RdRp ortholog; canonical PRV L1	Oncorhynchus tshawytscha	Canada	11-Feb-2011		lambda3	QPL20289.1		3861	MT758834.1_L1
MT758833.1	7230	L2	2	L2	source label retained	Oncorhynchus tshawytscha	Canada	11-Feb-2011		lambda2	QPL20288.1		3873	MT758833.1_L2
MT758832.1	7230	L3	3	L1	lambda1/core-shell ortholog; canonical PRV L3	Oncorhynchus tshawytscha	Canada	11-Feb-2011		lambda1	QPL20287.1		3849	MT758832.1_L3
MT758835.1	7230	M1	4	M1	source label retained	Oncorhynchus tshawytscha	Canada	11-Feb-2011		mu2	QPL20290.1		2283	MT758835.1_M1
MT758836.1	7230	M2	5	M2	source label retained	Oncorhynchus tshawytscha	Canada	11-Feb-2011		mu1	QPL20291.1		2070	MT758836.1_M2
MT758837.1	7230	M3	6	M3	source label retained	Oncorhynchus tshawytscha	Canada	11-Feb-2011		muNS	QPL20292.1		2298	MT758837.1_M3
MT758838.1	7230	S1	7	S1	source label retained	Oncorhynchus tshawytscha	Canada	11-Feb-2011		sigma3	QPL20293.1		993	MT758838.1_S1
MT758839.1	7230	S2	8	S2	source label retained	Oncorhynchus tshawytscha	Canada	11-Feb-2011		sigma2	QPL20295.1		1263	MT758839.1_S2
MT758840.1	7230	S3	9	S3	source label retained	Oncorhynchus tshawytscha	Canada	11-Feb-2011		sigmaNS	QPL20296.1		1065	MT758840.1_S3
MT758841.1	7230	S4	10	S4	source label retained	Oncorhynchus tshawytscha	Canada	11-Feb-2011		sigma1	QPL20297.1		948	MT758841.1_S4
MT759024.1	7740	L1	1	L3	lambda3/RdRp ortholog; canonical PRV L1	Oncorhynchus kisutch	Canada	16-Jun-2011		lambda3	QPL20498.1		3861	MT759024.1_L1
MT759023.1	7740	L2	2	L2	source label retained	Oncorhynchus kisutch	Canada	16-Jun-2011		lambda2	QPL20497.1		3873	MT759023.1_L2
MT759022.1	7740	L3	3	L1	lambda1/core-shell ortholog; canonical PRV L3	Oncorhynchus kisutch	Canada	16-Jun-2011		lambda1	QPL20496.1		3849	MT759022.1_L3
MT759025.1	7740	M1	4	M1	source label retained	Oncorhynchus kisutch	Canada	16-Jun-2011		mu2	QPL20499.1		2283	MT759025.1_M1
MT759026.1	7740	M2	5	M2	source label retained	Oncorhynchus kisutch	Canada	16-Jun-2011		mu1	QPL20500.1		2070	MT759026.1_M2
MT759027.1	7740	M3	6	M3	source label retained	Oncorhynchus kisutch	Canada	16-Jun-2011		muNS	QPL20501.1		2298	MT759027.1_M3
MT759028.1	7740	S1	7	S1	source label retained	Oncorhynchus kisutch	Canada	16-Jun-2011		sigma3	QPL20502.1		993	MT759028.1_S1
MT759029.1	7740	S2	8	S2	source label retained	Oncorhynchus kisutch	Canada	16-Jun-2011		sigma2	QPL20504.1		1263	MT759029.1_S2
MT759030.1	7740	S3	9	S3	source label retained	Oncorhynchus kisutch	Canada	16-Jun-2011		sigmaNS	QPL20505.1		1065	MT759030.1_S3
MT759031.1	7740	S4	10	S4	source label retained	Oncorhynchus kisutch	Canada	16-Jun-2011		sigma1	QPL20506.1		948	MT759031.1_S4
MT759034.1	7805	L1	1	L3	lambda3/RdRp ortholog; canonical PRV L1	Oncorhynchus kisutch	Canada	21-Jun-2011		lambda3	QPL20509.1		3861	MT759034.1_L1
MT759033.1	7805	L2	2	L2	source label retained	Oncorhynchus kisutch	Canada	21-Jun-2011		lambda2	QPL20508.1		3873	MT759033.1_L2
MT759032.1	7805	L3	3	L1	lambda1/core-shell ortholog; canonical PRV L3	Oncorhynchus kisutch	Canada	21-Jun-2011		lambda1	QPL20507.1		3849	MT759032.1_L3
MT759035.1	7805	M1	4	M1	source label retained	Oncorhynchus kisutch	Canada	21-Jun-2011		mu2	QPL20510.1		2283	MT759035.1_M1
MT759036.1	7805	M2	5	M2	source label retained	Oncorhynchus kisutch	Canada	21-Jun-2011		mu1	QPL20511.1		2070	MT759036.1_M2
MT759037.1	7805	M3	6	M3	source label retained	Oncorhynchus kisutch	Canada	21-Jun-2011		muNS	QPL20512.1		2298	MT759037.1_M3
MT759038.1	7805	S1	7	S1	source label retained	Oncorhynchus kisutch	Canada	21-Jun-2011		sigma3	QPL20513.1		993	MT759038.1_S1
MT759039.1	7805	S2	8	S2	source label retained	Oncorhynchus kisutch	Canada	21-Jun-2011		sigma2	QPL20515.1		1263	MT759039.1_S2
MT759040.1	7805	S3	9	S3	source label retained	Oncorhynchus kisutch	Canada	21-Jun-2011		sigmaNS	QPL20516.1		1065	MT759040.1_S3
MT759041.1	7805	S4	10	S4	source label retained	Oncorhynchus kisutch	Canada	21-Jun-2011		sigma1	QPL20517.1		948	MT759041.1_S4
MT759044.1	7825	L1	1	L3	lambda3/RdRp ortholog; canonical PRV L1	Oncorhynchus kisutch	Canada	22-Jun-2011		lambda3	QPL20520.1		3861	MT759044.1_L1
MT759043.1	7825	L2	2	L2	source label retained	Oncorhynchus kisutch	Canada	22-Jun-2011		lambda2	QPL20519.1		3873	MT759043.1_L2
MT759042.1	7825	L3	3	L1	lambda1/core-shell ortholog; canonical PRV L3	Oncorhynchus kisutch	Canada	22-Jun-2011		lambda1	QPL20518.1		3849	MT759042.1_L3
MT759045.1	7825	M1	4	M1	source label retained	Oncorhynchus kisutch	Canada	22-Jun-2011		mu2	QPL20521.1		2283	MT759045.1_M1
MT759046.1	7825	M2	5	M2	source label retained	Oncorhynchus kisutch	Canada	22-Jun-2011		mu1	QPL20522.1		2070	MT759046.1_M2
MT759047.1	7825	M3	6	M3	source label retained	Oncorhynchus kisutch	Canada	22-Jun-2011		muNS	QPL20523.1		2298	MT759047.1_M3
MT759048.1	7825	S1	7	S1	source label retained	Oncorhynchus kisutch	Canada	22-Jun-2011		sigma3	QPL20524.1		993	MT759048.1_S1
MT759049.1	7825	S2	8	S2	source label retained	Oncorhynchus kisutch	Canada	22-Jun-2011		sigma2	QPL20526.1		1263	MT759049.1_S2
MT759050.1	7825	S3	9	S3	source label retained	Oncorhynchus kisutch	Canada	22-Jun-2011		sigmaNS	QPL20527.1		1065	MT759050.1_S3
MT759051.1	7825	S4	10	S4	source label retained	Oncorhynchus kisutch	Canada	22-Jun-2011		sigma1	QPL20528.1		948	MT759051.1_S4
MT758874.1	7926	L1	1	L3	lambda3/RdRp ortholog; canonical PRV L1	Oncorhynchus tshawytscha	Canada	29-Jun-2011		lambda3	QPL20333.1		3861	MT758874.1_L1
MT758873.1	7926	L2	2	L2	source label retained	Oncorhynchus tshawytscha	Canada	29-Jun-2011		lambda2	QPL20332.1		3873	MT758873.1_L2
MT758872.1	7926	L3	3	L1	lambda1/core-shell ortholog; canonical PRV L3	Oncorhynchus tshawytscha	Canada	29-Jun-2011		lambda1	QPL20331.1		3849	MT758872.1_L3
MT758875.1	7926	M1	4	M1	source label retained	Oncorhynchus tshawytscha	Canada	29-Jun-2011		mu2	QPL20334.1		2283	MT758875.1_M1
MT758876.1	7926	M2	5	M2	source label retained	Oncorhynchus tshawytscha	Canada	29-Jun-2011		mu1	QPL20335.1		2070	MT758876.1_M2
MT758877.1	7926	M3	6	M3	source label retained	Oncorhynchus tshawytscha	Canada	29-Jun-2011		muNS	QPL20336.1		2298	MT758877.1_M3
MT758878.1	7926	S1	7	S1	source label retained	Oncorhynchus tshawytscha	Canada	29-Jun-2011		sigma3	QPL20337.1		993	MT758878.1_S1
MT758879.1	7926	S2	8	S2	source label retained	Oncorhynchus tshawytscha	Canada	29-Jun-2011		sigma2	QPL20339.1		1263	MT758879.1_S2
MT758880.1	7926	S3	9	S3	source label retained	Oncorhynchus tshawytscha	Canada	29-Jun-2011		sigmaNS	QPL20340.1		1065	MT758880.1_S3
MT758881.1	7926	S4	10	S4	source label retained	Oncorhynchus tshawytscha	Canada	29-Jun-2011		sigma1	QPL20341.1		948	MT758881.1_S4
MT758814.1	8820	L1	1	L3	lambda3/RdRp ortholog; canonical PRV L1	Oncorhynchus tshawytscha	Canada	04-Oct-2011		lambda3	QPL20267.1		3861	MT758814.1_L1
MT758813.1	8820	L2	2	L2	source label retained	Oncorhynchus tshawytscha	Canada	04-Oct-2011		lambda2	QPL20266.1		3873	MT758813.1_L2
MT758812.1	8820	L3	3	L1	lambda1/core-shell ortholog; canonical PRV L3	Oncorhynchus tshawytscha	Canada	04-Oct-2011		lambda1	QPL20265.1		3849	MT758812.1_L3
MT758815.1	8820	M1	4	M1	source label retained	Oncorhynchus tshawytscha	Canada	04-Oct-2011		mu2	QPL20268.1		2283	MT758815.1_M1
MT758816.1	8820	M2	5	M2	source label retained	Oncorhynchus tshawytscha	Canada	04-Oct-2011		mu1	QPL20269.1		2070	MT758816.1_M2
MT758817.1	8820	M3	6	M3	source label retained	Oncorhynchus tshawytscha	Canada	04-Oct-2011		muNS	QPL20270.1		2298	MT758817.1_M3
MT758818.1	8820	S1	7	S1	source label retained	Oncorhynchus tshawytscha	Canada	04-Oct-2011		sigma3	QPL20271.1		993	MT758818.1_S1
MT758819.1	8820	S2	8	S2	source label retained	Oncorhynchus tshawytscha	Canada	04-Oct-2011		sigma2	QPL20273.1		1263	MT758819.1_S2
MT758820.1	8820	S3	9	S3	source label retained	Oncorhynchus tshawytscha	Canada	04-Oct-2011		sigmaNS	QPL20274.1		1065	MT758820.1_S3
MT758821.1	8820	S4	10	S4	source label retained	Oncorhynchus tshawytscha	Canada	04-Oct-2011		sigma1	QPL20275.1		948	MT758821.1_S4
MT758704.1	9310	L1	1	L3	lambda3/RdRp ortholog; canonical PRV L1	Oncorhynchus tshawytscha	Canada	08-Mar-2012		lambda3	QPL20146.1		3861	MT758704.1_L1
MT758703.1	9310	L2	2	L2	source label retained	Oncorhynchus tshawytscha	Canada	08-Mar-2012		lambda2	QPL20145.1		3873	MT758703.1_L2
MT758702.1	9310	L3	3	L1	lambda1/core-shell ortholog; canonical PRV L3	Oncorhynchus tshawytscha	Canada	08-Mar-2012		lambda1	QPL20144.1		3849	MT758702.1_L3
MT758705.1	9310	M1	4	M1	source label retained	Oncorhynchus tshawytscha	Canada	08-Mar-2012		mu2	QPL20147.1		2283	MT758705.1_M1
MT758706.1	9310	M2	5	M2	source label retained	Oncorhynchus tshawytscha	Canada	08-Mar-2012		mu1	QPL20148.1		2070	MT758706.1_M2
MT758707.1	9310	M3	6	M3	source label retained	Oncorhynchus tshawytscha	Canada	08-Mar-2012		muNS	QPL20149.1		2298	MT758707.1_M3
MT758708.1	9310	S1	7	S1	source label retained	Oncorhynchus tshawytscha	Canada	08-Mar-2012		sigma3	QPL20150.1		993	MT758708.1_S1
MT758709.1	9310	S2	8	S2	source label retained	Oncorhynchus tshawytscha	Canada	08-Mar-2012		sigma2	QPL20152.1		1263	MT758709.1_S2
MT758710.1	9310	S3	9	S3	source label retained	Oncorhynchus tshawytscha	Canada	08-Mar-2012		sigmaNS	QPL20153.1		1065	MT758710.1_S3
MT758711.1	9310	S4	10	S4	source label retained	Oncorhynchus tshawytscha	Canada	08-Mar-2012		sigma1	QPL20154.1		948	MT758711.1_S4
MT758994.1	B0404	L1	1	L3	lambda3/RdRp ortholog; canonical PRV L1	Oncorhynchus tshawytscha	Canada	21-Jun-2012		lambda3	QPL20465.1		3861	MT758994.1_L1
MT758993.1	B0404	L2	2	L2	source label retained	Oncorhynchus tshawytscha	Canada	21-Jun-2012		lambda2	QPL20464.1		3873	MT758993.1_L2
MT758992.1	B0404	L3	3	L1	lambda1/core-shell ortholog; canonical PRV L3	Oncorhynchus tshawytscha	Canada	21-Jun-2012		lambda1	QPL20463.1		3849	MT758992.1_L3
MT758995.1	B0404	M1	4	M1	source label retained	Oncorhynchus tshawytscha	Canada	21-Jun-2012		mu2	QPL20466.1		2283	MT758995.1_M1
MT758996.1	B0404	M2	5	M2	source label retained	Oncorhynchus tshawytscha	Canada	21-Jun-2012		mu1	QPL20467.1		2070	MT758996.1_M2
MT758997.1	B0404	M3	6	M3	source label retained	Oncorhynchus tshawytscha	Canada	21-Jun-2012		muNS	QPL20468.1		2298	MT758997.1_M3
MT758998.1	B0404	S1	7	S1	source label retained	Oncorhynchus tshawytscha	Canada	21-Jun-2012		sigma3	QPL20469.1		993	MT758998.1_S1
MT758999.1	B0404	S2	8	S2	source label retained	Oncorhynchus tshawytscha	Canada	21-Jun-2012		sigma2	QPL20471.1		1263	MT758999.1_S2
MT759000.1	B0404	S3	9	S3	source label retained	Oncorhynchus tshawytscha	Canada	21-Jun-2012		sigmaNS	QPL20472.1		1065	MT759000.1_S3
MT759001.1	B0404	S4	10	S4	source label retained	Oncorhynchus tshawytscha	Canada	21-Jun-2012		sigma1	QPL20473.1		948	MT759001.1_S4
MT758894.1	B2176	L1	1	L3	lambda3/RdRp ortholog; canonical PRV L1	Oncorhynchus tshawytscha	Canada	10-Mar-2013		lambda3	QPL20355.1		3861	MT758894.1_L1
MT758893.1	B2176	L2	2	L2	source label retained	Oncorhynchus tshawytscha	Canada	10-Mar-2013		lambda2	QPL20354.1		3873	MT758893.1_L2
MT758892.1	B2176	L3	3	L1	lambda1/core-shell ortholog; canonical PRV L3	Oncorhynchus tshawytscha	Canada	10-Mar-2013		lambda1	QPL20353.1		3849	MT758892.1_L3
MT758895.1	B2176	M1	4	M1	source label retained	Oncorhynchus tshawytscha	Canada	10-Mar-2013		mu2	QPL20356.1		2283	MT758895.1_M1
MT758896.1	B2176	M2	5	M2	source label retained	Oncorhynchus tshawytscha	Canada	10-Mar-2013		mu1	QPL20357.1		2070	MT758896.1_M2
MT758897.1	B2176	M3	6	M3	source label retained	Oncorhynchus tshawytscha	Canada	10-Mar-2013		muNS	QPL20358.1		2298	MT758897.1_M3
MT758898.1	B2176	S1	7	S1	source label retained	Oncorhynchus tshawytscha	Canada	10-Mar-2013		sigma3	QPL20359.1		993	MT758898.1_S1
MT758899.1	B2176	S2	8	S2	source label retained	Oncorhynchus tshawytscha	Canada	10-Mar-2013		sigma2	QPL20361.1		1263	MT758899.1_S2
MT758900.1	B2176	S3	9	S3	source label retained	Oncorhynchus tshawytscha	Canada	10-Mar-2013		sigmaNS	QPL20362.1		1065	MT758900.1_S3
MT758901.1	B2176	S4	10	S4	source label retained	Oncorhynchus tshawytscha	Canada	10-Mar-2013		sigma1	QPL20363.1		948	MT758901.1_S4
MT759194.1	B5392	L1	1	L3	lambda3/RdRp ortholog; canonical PRV L1	Salmo salar	Canada	28-Aug-2013		lambda3	QPL20685.1		3861	MT759194.1_L1
MT759193.1	B5392	L2	2	L2	source label retained	Salmo salar	Canada	28-Aug-2013		lambda2	QPL20684.1		3873	MT759193.1_L2
MT759192.1	B5392	L3	3	L1	lambda1/core-shell ortholog; canonical PRV L3	Salmo salar	Canada	28-Aug-2013		lambda1	QPL20683.1		3849	MT759192.1_L3
MT759195.1	B5392	M1	4	M1	source label retained	Salmo salar	Canada	28-Aug-2013		mu2	QPL20686.1		2283	MT759195.1_M1
MT759196.1	B5392	M2	5	M2	source label retained	Salmo salar	Canada	28-Aug-2013		mu1	QPL20687.1		2070	MT759196.1_M2
MT759197.1	B5392	M3	6	M3	source label retained	Salmo salar	Canada	28-Aug-2013		muNS	QPL20688.1		2298	MT759197.1_M3
MT759198.1	B5392	S1	7	S1	source label retained	Salmo salar	Canada	28-Aug-2013		sigma3	QPL20689.1		993	MT759198.1_S1
MT759199.1	B5392	S2	8	S2	source label retained	Salmo salar	Canada	28-Aug-2013		sigma2	QPL20691.1		1263	MT759199.1_S2
MT759200.1	B5392	S3	9	S3	source label retained	Salmo salar	Canada	28-Aug-2013		sigmaNS	QPL20692.1		1065	MT759200.1_S3
MT759201.1	B5392	S4	10	S4	source label retained	Salmo salar	Canada	28-Aug-2013		sigma1	QPL20693.1		948	MT759201.1_S4
MT759064.1	B5591	L1	1	L3	lambda3/RdRp ortholog; canonical PRV L1	Salmo salar	Canada	28-Aug-2013		lambda3	QPL20542.1		3861	MT759064.1_L1
MT759063.1	B5591	L2	2	L2	source label retained	Salmo salar	Canada	28-Aug-2013		lambda2	QPL20541.1		3873	MT759063.1_L2
MT759062.1	B5591	L3	3	L1	lambda1/core-shell ortholog; canonical PRV L3	Salmo salar	Canada	28-Aug-2013		lambda1	QPL20540.1		3849	MT759062.1_L3
MT759065.1	B5591	M1	4	M1	source label retained	Salmo salar	Canada	28-Aug-2013		mu2	QPL20543.1		2283	MT759065.1_M1
MT759066.1	B5591	M2	5	M2	source label retained	Salmo salar	Canada	28-Aug-2013		mu1	QPL20544.1		2070	MT759066.1_M2
MT759067.1	B5591	M3	6	M3	source label retained	Salmo salar	Canada	28-Aug-2013		muNS	QPL20545.1		2298	MT759067.1_M3
MT759068.1	B5591	S1	7	S1	source label retained	Salmo salar	Canada	28-Aug-2013		sigma3	QPL20546.1		993	MT759068.1_S1
MT759069.1	B5591	S2	8	S2	source label retained	Salmo salar	Canada	28-Aug-2013		sigma2	QPL20548.1		1263	MT759069.1_S2
MT759070.1	B5591	S3	9	S3	source label retained	Salmo salar	Canada	28-Aug-2013		sigmaNS	QPL20549.1		1065	MT759070.1_S3
MT759071.1	B5591	S4	10	S4	source label retained	Salmo salar	Canada	28-Aug-2013		sigma1	QPL20550.1		948	MT759071.1_S4
MT759074.1	B5593	L1	1	L3	lambda3/RdRp ortholog; canonical PRV L1	Salmo salar	Canada	28-Aug-2013		lambda3	QPL20553.1		3861	MT759074.1_L1
MT759073.1	B5593	L2	2	L2	source label retained	Salmo salar	Canada	28-Aug-2013		lambda2	QPL20552.1		3873	MT759073.1_L2
MT759072.1	B5593	L3	3	L1	lambda1/core-shell ortholog; canonical PRV L3	Salmo salar	Canada	28-Aug-2013		lambda1	QPL20551.1		3849	MT759072.1_L3
MT759075.1	B5593	M1	4	M1	source label retained	Salmo salar	Canada	28-Aug-2013		mu2	QPL20554.1		2283	MT759075.1_M1
MT759076.1	B5593	M2	5	M2	source label retained	Salmo salar	Canada	28-Aug-2013		mu1	QPL20555.1		2070	MT759076.1_M2
MT759077.1	B5593	M3	6	M3	source label retained	Salmo salar	Canada	28-Aug-2013		muNS	QPL20556.1		2298	MT759077.1_M3
MT759078.1	B5593	S1	7	S1	source label retained	Salmo salar	Canada	28-Aug-2013		sigma3	QPL20557.1		993	MT759078.1_S1
MT759079.1	B5593	S2	8	S2	source label retained	Salmo salar	Canada	28-Aug-2013		sigma2	QPL20559.1		1263	MT759079.1_S2
MT759080.1	B5593	S3	9	S3	source label retained	Salmo salar	Canada	28-Aug-2013		sigmaNS	QPL20560.1		1065	MT759080.1_S3
MT759081.1	B5593	S4	10	S4	source label retained	Salmo salar	Canada	28-Aug-2013		sigma1	QPL20561.1		948	MT759081.1_S4
MT759104.1	B5597	L1	1	L3	lambda3/RdRp ortholog; canonical PRV L1	Salmo salar	Canada	28-Aug-2013		lambda3	QPL20586.1		3861	MT759104.1_L1
MT759103.1	B5597	L2	2	L2	source label retained	Salmo salar	Canada	28-Aug-2013		lambda2	QPL20585.1		3873	MT759103.1_L2
MT759102.1	B5597	L3	3	L1	lambda1/core-shell ortholog; canonical PRV L3	Salmo salar	Canada	28-Aug-2013		lambda1	QPL20584.1		3849	MT759102.1_L3
MT759105.1	B5597	M1	4	M1	source label retained	Salmo salar	Canada	28-Aug-2013		mu2	QPL20587.1		2283	MT759105.1_M1
MT759106.1	B5597	M2	5	M2	source label retained	Salmo salar	Canada	28-Aug-2013		mu1	QPL20588.1		2070	MT759106.1_M2
MT759107.1	B5597	M3	6	M3	source label retained	Salmo salar	Canada	28-Aug-2013		muNS	QPL20589.1		2298	MT759107.1_M3
MT759108.1	B5597	S1	7	S1	source label retained	Salmo salar	Canada	28-Aug-2013		sigma3	QPL20590.1		993	MT759108.1_S1
MT759109.1	B5597	S2	8	S2	source label retained	Salmo salar	Canada	28-Aug-2013		sigma2	QPL20592.1		1263	MT759109.1_S2
MT759110.1	B5597	S3	9	S3	source label retained	Salmo salar	Canada	28-Aug-2013		sigmaNS	QPL20593.1		1065	MT759110.1_S3
MT759111.1	B5597	S4	10	S4	source label retained	Salmo salar	Canada	28-Aug-2013		sigma1	QPL20594.1		948	MT759111.1_S4
MT759004.1	B7146	L1	1	L3	lambda3/RdRp ortholog; canonical PRV L1	Oncorhynchus tshawytscha	Canada	05-Nov-2013		lambda3	QPL20476.1		3861	MT759004.1_L1
MT759003.1	B7146	L2	2	L2	source label retained	Oncorhynchus tshawytscha	Canada	05-Nov-2013		lambda2	QPL20475.1		3873	MT759003.1_L2
MT759002.1	B7146	L3	3	L1	lambda1/core-shell ortholog; canonical PRV L3	Oncorhynchus tshawytscha	Canada	05-Nov-2013		lambda1	QPL20474.1		3849	MT759002.1_L3
MT759005.1	B7146	M1	4	M1	source label retained	Oncorhynchus tshawytscha	Canada	05-Nov-2013		mu2	QPL20477.1		2283	MT759005.1_M1
MT759006.1	B7146	M2	5	M2	source label retained	Oncorhynchus tshawytscha	Canada	05-Nov-2013		mu1	QPL20478.1		2070	MT759006.1_M2
MT759007.1	B7146	M3	6	M3	source label retained	Oncorhynchus tshawytscha	Canada	05-Nov-2013		muNS	QPL20479.1		2298	MT759007.1_M3
MT759008.1	B7146	S1	7	S1	source label retained	Oncorhynchus tshawytscha	Canada	05-Nov-2013		sigma3	QPL20480.1		993	MT759008.1_S1
MT759009.1	B7146	S2	8	S2	source label retained	Oncorhynchus tshawytscha	Canada	05-Nov-2013		sigma2	QPL20482.1		1263	MT759009.1_S2
MT759010.1	B7146	S3	9	S3	source label retained	Oncorhynchus tshawytscha	Canada	05-Nov-2013		sigmaNS	QPL20483.1		1065	MT759010.1_S3
MT759011.1	B7146	S4	10	S4	source label retained	Oncorhynchus tshawytscha	Canada	05-Nov-2013		sigma1	QPL20484.1		948	MT759011.1_S4
MT759404.1	B7283	L1	1	L3	lambda3/RdRp ortholog; canonical PRV L1	Salmo salar	Canada	23-Oct-2013		lambda3	QPL20916.1		3861	MT759404.1_L1
MT759403.1	B7283	L2	2	L2	source label retained	Salmo salar	Canada	23-Oct-2013		lambda2	QPL20915.1		3873	MT759403.1_L2
MT759402.1	B7283	L3	3	L1	lambda1/core-shell ortholog; canonical PRV L3	Salmo salar	Canada	23-Oct-2013		lambda1	QPL20914.1		3849	MT759402.1_L3
MT759405.1	B7283	M1	4	M1	source label retained	Salmo salar	Canada	23-Oct-2013		mu2	QPL20917.1		2283	MT759405.1_M1
MT759406.1	B7283	M2	5	M2	source label retained	Salmo salar	Canada	23-Oct-2013		mu1	QPL20918.1		2070	MT759406.1_M2
MT759407.1	B7283	M3	6	M3	source label retained	Salmo salar	Canada	23-Oct-2013		muNS	QPL20919.1		2298	MT759407.1_M3
MT759408.1	B7283	S1	7	S1	source label retained	Salmo salar	Canada	23-Oct-2013		sigma3	QPL20920.1		993	MT759408.1_S1
MT759409.1	B7283	S2	8	S2	source label retained	Salmo salar	Canada	23-Oct-2013		sigma2	QPL20922.1		1263	MT759409.1_S2
MT759410.1	B7283	S3	9	S3	source label retained	Salmo salar	Canada	23-Oct-2013		sigmaNS	QPL20923.1		1065	MT759410.1_S3
MT759411.1	B7283	S4	10	S4	source label retained	Salmo salar	Canada	23-Oct-2013		sigma1	QPL20924.1		948	MT759411.1_S4
MT759394.1	B7286	L1	1	L3	lambda3/RdRp ortholog; canonical PRV L1	Salmo salar	Canada	23-Oct-2013		lambda3	QPL20905.1		3861	MT759394.1_L1
MT759393.1	B7286	L2	2	L2	source label retained	Salmo salar	Canada	23-Oct-2013		lambda2	QPL20904.1		3873	MT759393.1_L2
MT759392.1	B7286	L3	3	L1	lambda1/core-shell ortholog; canonical PRV L3	Salmo salar	Canada	23-Oct-2013		lambda1	QPL20903.1		3849	MT759392.1_L3
MT759395.1	B7286	M1	4	M1	source label retained	Salmo salar	Canada	23-Oct-2013		mu2	QPL20906.1		2283	MT759395.1_M1
MT759396.1	B7286	M2	5	M2	source label retained	Salmo salar	Canada	23-Oct-2013		mu1	QPL20907.1		2070	MT759396.1_M2
MT759397.1	B7286	M3	6	M3	source label retained	Salmo salar	Canada	23-Oct-2013		muNS	QPL20908.1		2298	MT759397.1_M3
MT759398.1	B7286	S1	7	S1	source label retained	Salmo salar	Canada	23-Oct-2013		sigma3	QPL20909.1		993	MT759398.1_S1
MT759399.1	B7286	S2	8	S2	source label retained	Salmo salar	Canada	23-Oct-2013		sigma2	QPL20911.1		1263	MT759399.1_S2
MT759400.1	B7286	S3	9	S3	source label retained	Salmo salar	Canada	23-Oct-2013		sigmaNS	QPL20912.1		1065	MT759400.1_S3
MT759401.1	B7286	S4	10	S4	source label retained	Salmo salar	Canada	23-Oct-2013		sigma1	QPL20913.1		948	MT759401.1_S4
MT759244.1	B7293	L1	1	L3	lambda3/RdRp ortholog; canonical PRV L1	Salmo salar	Canada	23-Oct-2013		lambda3	QPL20740.1		3861	MT759244.1_L1
MT759243.1	B7293	L2	2	L2	source label retained	Salmo salar	Canada	23-Oct-2013		lambda2	QPL20739.1		3873	MT759243.1_L2
MT759242.1	B7293	L3	3	L1	lambda1/core-shell ortholog; canonical PRV L3	Salmo salar	Canada	23-Oct-2013		lambda1	QPL20738.1		3849	MT759242.1_L3
MT759245.1	B7293	M1	4	M1	source label retained	Salmo salar	Canada	23-Oct-2013		mu2	QPL20741.1		2283	MT759245.1_M1
MT759246.1	B7293	M2	5	M2	source label retained	Salmo salar	Canada	23-Oct-2013		mu1	QPL20742.1		2070	MT759246.1_M2
MT759247.1	B7293	M3	6	M3	source label retained	Salmo salar	Canada	23-Oct-2013		muNS	QPL20743.1		2298	MT759247.1_M3
MT759248.1	B7293	S1	7	S1	source label retained	Salmo salar	Canada	23-Oct-2013		sigma3	QPL20744.1		993	MT759248.1_S1
MT759249.1	B7293	S2	8	S2	source label retained	Salmo salar	Canada	23-Oct-2013		sigma2	QPL20746.1		1263	MT759249.1_S2
MT759250.1	B7293	S3	9	S3	source label retained	Salmo salar	Canada	23-Oct-2013		sigmaNS	QPL20747.1		1065	MT759250.1_S3
MT759251.1	B7293	S4	10	S4	source label retained	Salmo salar	Canada	23-Oct-2013		sigma1	QPL20748.1		948	MT759251.1_S4
MT759114.1	B7437	L1	1	L3	lambda3/RdRp ortholog; canonical PRV L1	Salmo salar	Canada	30-Oct-2013		lambda3	QPL20597.1		3861	MT759114.1_L1
MT759113.1	B7437	L2	2	L2	source label retained	Salmo salar	Canada	30-Oct-2013		lambda2	QPL20596.1		3873	MT759113.1_L2
MT759112.1	B7437	L3	3	L1	lambda1/core-shell ortholog; canonical PRV L3	Salmo salar	Canada	30-Oct-2013		lambda1	QPL20595.1		3849	MT759112.1_L3
MT759115.1	B7437	M1	4	M1	source label retained	Salmo salar	Canada	30-Oct-2013		mu2	QPL20598.1		2283	MT759115.1_M1
MT759116.1	B7437	M2	5	M2	source label retained	Salmo salar	Canada	30-Oct-2013		mu1	QPL20599.1		2070	MT759116.1_M2
MT759117.1	B7437	M3	6	M3	source label retained	Salmo salar	Canada	30-Oct-2013		muNS	QPL20600.1		2298	MT759117.1_M3
MT759118.1	B7437	S1	7	S1	source label retained	Salmo salar	Canada	30-Oct-2013		sigma3	QPL20601.1		993	MT759118.1_S1
MT759119.1	B7437	S2	8	S2	source label retained	Salmo salar	Canada	30-Oct-2013		sigma2	QPL20603.1		1263	MT759119.1_S2
MT759120.1	B7437	S3	9	S3	source label retained	Salmo salar	Canada	30-Oct-2013		sigmaNS	QPL20604.1		1065	MT759120.1_S3
MT759121.1	B7437	S4	10	S4	source label retained	Salmo salar	Canada	30-Oct-2013		sigma1	QPL20605.1		948	MT759121.1_S4
MT759254.1	B7453	L1	1	L3	lambda3/RdRp ortholog; canonical PRV L1	Salmo salar	Canada	05-Nov-2013		lambda3	QPL20751.1		3861	MT759254.1_L1
MT759253.1	B7453	L2	2	L2	source label retained	Salmo salar	Canada	05-Nov-2013		lambda2	QPL20750.1		3873	MT759253.1_L2
MT759252.1	B7453	L3	3	L1	lambda1/core-shell ortholog; canonical PRV L3	Salmo salar	Canada	05-Nov-2013		lambda1	QPL20749.1		3849	MT759252.1_L3
MT759255.1	B7453	M1	4	M1	source label retained	Salmo salar	Canada	05-Nov-2013		mu2	QPL20752.1		2283	MT759255.1_M1
MT759256.1	B7453	M2	5	M2	source label retained	Salmo salar	Canada	05-Nov-2013		mu1	QPL20753.1		2070	MT759256.1_M2
MT759257.1	B7453	M3	6	M3	source label retained	Salmo salar	Canada	05-Nov-2013		muNS	QPL20754.1		2298	MT759257.1_M3
MT759258.1	B7453	S1	7	S1	source label retained	Salmo salar	Canada	05-Nov-2013		sigma3	QPL20755.1		993	MT759258.1_S1
MT759259.1	B7453	S2	8	S2	source label retained	Salmo salar	Canada	05-Nov-2013		sigma2	QPL20757.1		1263	MT759259.1_S2
MT759260.1	B7453	S3	9	S3	source label retained	Salmo salar	Canada	05-Nov-2013		sigmaNS	QPL20758.1		1065	MT759260.1_S3
MT759261.1	B7453	S4	10	S4	source label retained	Salmo salar	Canada	05-Nov-2013		sigma1	QPL20759.1		948	MT759261.1_S4
MT759084.1	B7474	L1	1	L3	lambda3/RdRp ortholog; canonical PRV L1	Salmo salar	Canada	05-Nov-2013		lambda3	QPL20564.1		3861	MT759084.1_L1
MT759083.1	B7474	L2	2	L2	source label retained	Salmo salar	Canada	05-Nov-2013		lambda2	QPL20563.1		3873	MT759083.1_L2
MT759082.1	B7474	L3	3	L1	lambda1/core-shell ortholog; canonical PRV L3	Salmo salar	Canada	05-Nov-2013		lambda1	QPL20562.1		3849	MT759082.1_L3
MT759085.1	B7474	M1	4	M1	source label retained	Salmo salar	Canada	05-Nov-2013		mu2	QPL20565.1		2283	MT759085.1_M1
MT759086.1	B7474	M2	5	M2	source label retained	Salmo salar	Canada	05-Nov-2013		mu1	QPL20566.1		2070	MT759086.1_M2
MT759087.1	B7474	M3	6	M3	source label retained	Salmo salar	Canada	05-Nov-2013		muNS	QPL20567.1		2298	MT759087.1_M3
MT759088.1	B7474	S1	7	S1	source label retained	Salmo salar	Canada	05-Nov-2013		sigma3	QPL20568.1		993	MT759088.1_S1
MT759089.1	B7474	S2	8	S2	source label retained	Salmo salar	Canada	05-Nov-2013		sigma2	QPL20570.1		1263	MT759089.1_S2
MT759090.1	B7474	S3	9	S3	source label retained	Salmo salar	Canada	05-Nov-2013		sigmaNS	QPL20571.1		1065	MT759090.1_S3
MT759091.1	B7474	S4	10	S4	source label retained	Salmo salar	Canada	05-Nov-2013		sigma1	QPL20572.1		948	MT759091.1_S4
MT759094.1	B7483	L1	1	L3	lambda3/RdRp ortholog; canonical PRV L1	Salmo salar	Canada	05-Nov-2013		lambda3	QPL20575.1		3861	MT759094.1_L1
MT759093.1	B7483	L2	2	L2	source label retained	Salmo salar	Canada	05-Nov-2013		lambda2	QPL20574.1		3873	MT759093.1_L2
MT759092.1	B7483	L3	3	L1	lambda1/core-shell ortholog; canonical PRV L3	Salmo salar	Canada	05-Nov-2013		lambda1	QPL20573.1		3849	MT759092.1_L3
MT759095.1	B7483	M1	4	M1	source label retained	Salmo salar	Canada	05-Nov-2013		mu2	QPL20576.1		2283	MT759095.1_M1
MT759096.1	B7483	M2	5	M2	source label retained	Salmo salar	Canada	05-Nov-2013		mu1	QPL20577.1		2070	MT759096.1_M2
MT759097.1	B7483	M3	6	M3	source label retained	Salmo salar	Canada	05-Nov-2013		muNS	QPL20578.1		2298	MT759097.1_M3
MT759098.1	B7483	S1	7	S1	source label retained	Salmo salar	Canada	05-Nov-2013		sigma3	QPL20579.1		993	MT759098.1_S1
MT759099.1	B7483	S2	8	S2	source label retained	Salmo salar	Canada	05-Nov-2013		sigma2	QPL20581.1		1263	MT759099.1_S2
MT759100.1	B7483	S3	9	S3	source label retained	Salmo salar	Canada	05-Nov-2013		sigmaNS	QPL20582.1		1065	MT759100.1_S3
MT759101.1	B7483	S4	10	S4	source label retained	Salmo salar	Canada	05-Nov-2013		sigma1	QPL20583.1		948	MT759101.1_S4
MT759264.1	B7669	L1	1	L3	lambda3/RdRp ortholog; canonical PRV L1	Salmo salar	Canada	04-Dec-2013		lambda3	QPL20762.1		3861	MT759264.1_L1
MT759263.1	B7669	L2	2	L2	source label retained	Salmo salar	Canada	04-Dec-2013		lambda2	QPL20761.1		3873	MT759263.1_L2
MT759262.1	B7669	L3	3	L1	lambda1/core-shell ortholog; canonical PRV L3	Salmo salar	Canada	04-Dec-2013		lambda1	QPL20760.1		3849	MT759262.1_L3
MT759265.1	B7669	M1	4	M1	source label retained	Salmo salar	Canada	04-Dec-2013		mu2	QPL20763.1		2283	MT759265.1_M1
MT759266.1	B7669	M2	5	M2	source label retained	Salmo salar	Canada	04-Dec-2013		mu1	QPL20764.1		2070	MT759266.1_M2
MT759267.1	B7669	M3	6	M3	source label retained	Salmo salar	Canada	04-Dec-2013		muNS	QPL20765.1		2298	MT759267.1_M3
MT759268.1	B7669	S1	7	S1	source label retained	Salmo salar	Canada	04-Dec-2013		sigma3	QPL20766.1		993	MT759268.1_S1
MT759269.1	B7669	S2	8	S2	source label retained	Salmo salar	Canada	04-Dec-2013		sigma2	QPL20768.1		1263	MT759269.1_S2
MT759270.1	B7669	S3	9	S3	source label retained	Salmo salar	Canada	04-Dec-2013		sigmaNS	QPL20769.1		1065	MT759270.1_S3
MT759271.1	B7669	S4	10	S4	source label retained	Salmo salar	Canada	04-Dec-2013		sigma1	QPL20770.1		948	MT759271.1_S4
MT759324.1	B7803	L1	1	L3	lambda3/RdRp ortholog; canonical PRV L1	Salmo salar	Canada	07-Jan-2014		lambda3	QPL20828.1		3861	MT759324.1_L1
MT759323.1	B7803	L2	2	L2	source label retained	Salmo salar	Canada	07-Jan-2014		lambda2	QPL20827.1		3873	MT759323.1_L2
MT759322.1	B7803	L3	3	L1	lambda1/core-shell ortholog; canonical PRV L3	Salmo salar	Canada	07-Jan-2014		lambda1	QPL20826.1		3849	MT759322.1_L3
MT759325.1	B7803	M1	4	M1	source label retained	Salmo salar	Canada	07-Jan-2014		mu2	QPL20829.1		2283	MT759325.1_M1
MT759326.1	B7803	M2	5	M2	source label retained	Salmo salar	Canada	07-Jan-2014		mu1	QPL20830.1		2070	MT759326.1_M2
MT759327.1	B7803	M3	6	M3	source label retained	Salmo salar	Canada	07-Jan-2014		muNS	QPL20831.1		2298	MT759327.1_M3
MT759328.1	B7803	S1	7	S1	source label retained	Salmo salar	Canada	07-Jan-2014		sigma3	QPL20832.1		993	MT759328.1_S1
MT759329.1	B7803	S2	8	S2	source label retained	Salmo salar	Canada	07-Jan-2014		sigma2	QPL20834.1		1263	MT759329.1_S2
MT759330.1	B7803	S3	9	S3	source label retained	Salmo salar	Canada	07-Jan-2014		sigmaNS	QPL20835.1		1065	MT759330.1_S3
MT759331.1	B7803	S4	10	S4	source label retained	Salmo salar	Canada	07-Jan-2014		sigma1	QPL20836.1		948	MT759331.1_S4
MT759414.1	B7811	L1	1	L3	lambda3/RdRp ortholog; canonical PRV L1	Salmo salar	Canada	07-Jan-2014		lambda3	QPL20927.1		3861	MT759414.1_L1
MT759413.1	B7811	L2	2	L2	source label retained	Salmo salar	Canada	07-Jan-2014		lambda2	QPL20926.1		3873	MT759413.1_L2
MT759412.1	B7811	L3	3	L1	lambda1/core-shell ortholog; canonical PRV L3	Salmo salar	Canada	07-Jan-2014		lambda1	QPL20925.1		3849	MT759412.1_L3
MT759415.1	B7811	M1	4	M1	source label retained	Salmo salar	Canada	07-Jan-2014		mu2	QPL20928.1		2283	MT759415.1_M1
MT759416.1	B7811	M2	5	M2	source label retained	Salmo salar	Canada	07-Jan-2014		mu1	QPL20929.1		2070	MT759416.1_M2
MT759417.1	B7811	M3	6	M3	source label retained	Salmo salar	Canada	07-Jan-2014		muNS	QPL20930.1		2298	MT759417.1_M3
MT759418.1	B7811	S1	7	S1	source label retained	Salmo salar	Canada	07-Jan-2014		sigma3	QPL20931.1		993	MT759418.1_S1
MT759419.1	B7811	S2	8	S2	source label retained	Salmo salar	Canada	07-Jan-2014		sigma2	QPL20933.1		1263	MT759419.1_S2
MT759420.1	B7811	S3	9	S3	source label retained	Salmo salar	Canada	07-Jan-2014		sigmaNS	QPL20934.1		1065	MT759420.1_S3
MT759421.1	B7811	S4	10	S4	source label retained	Salmo salar	Canada	07-Jan-2014		sigma1	QPL20935.1		948	MT759421.1_S4
MT759274.1	B7874	L1	1	L3	lambda3/RdRp ortholog; canonical PRV L1	Salmo salar	Canada	15-Jan-2014		lambda3	QPL20773.1		3861	MT759274.1_L1
MT759273.1	B7874	L2	2	L2	source label retained	Salmo salar	Canada	15-Jan-2014		lambda2	QPL20772.1		3873	MT759273.1_L2
MT759272.1	B7874	L3	3	L1	lambda1/core-shell ortholog; canonical PRV L3	Salmo salar	Canada	15-Jan-2014		lambda1	QPL20771.1		3849	MT759272.1_L3
MT759275.1	B7874	M1	4	M1	source label retained	Salmo salar	Canada	15-Jan-2014		mu2	QPL20774.1		2283	MT759275.1_M1
MT759276.1	B7874	M2	5	M2	source label retained	Salmo salar	Canada	15-Jan-2014		mu1	QPL20775.1		2070	MT759276.1_M2
MT759277.1	B7874	M3	6	M3	source label retained	Salmo salar	Canada	15-Jan-2014		muNS	QPL20776.1		2298	MT759277.1_M3
MT759278.1	B7874	S1	7	S1	source label retained	Salmo salar	Canada	15-Jan-2014		sigma3	QPL20777.1		993	MT759278.1_S1
MT759279.1	B7874	S2	8	S2	source label retained	Salmo salar	Canada	15-Jan-2014		sigma2	QPL20779.1		1263	MT759279.1_S2
MT759280.1	B7874	S3	9	S3	source label retained	Salmo salar	Canada	15-Jan-2014		sigmaNS	QPL20780.1		1065	MT759280.1_S3
MT759281.1	B7874	S4	10	S4	source label retained	Salmo salar	Canada	15-Jan-2014		sigma1	QPL20781.1		948	MT759281.1_S4
MT759284.1	B7875	L1	1	L3	lambda3/RdRp ortholog; canonical PRV L1	Salmo salar	Canada	15-Jan-2014		lambda3	QPL20784.1		3861	MT759284.1_L1
MT759283.1	B7875	L2	2	L2	source label retained	Salmo salar	Canada	15-Jan-2014		lambda2	QPL20783.1		3873	MT759283.1_L2
MT759282.1	B7875	L3	3	L1	lambda1/core-shell ortholog; canonical PRV L3	Salmo salar	Canada	15-Jan-2014		lambda1	QPL20782.1		3849	MT759282.1_L3
MT759285.1	B7875	M1	4	M1	source label retained	Salmo salar	Canada	15-Jan-2014		mu2	QPL20785.1		2283	MT759285.1_M1
MT759286.1	B7875	M2	5	M2	source label retained	Salmo salar	Canada	15-Jan-2014		mu1	QPL20786.1		2070	MT759286.1_M2
MT759287.1	B7875	M3	6	M3	source label retained	Salmo salar	Canada	15-Jan-2014		muNS	QPL20787.1		2298	MT759287.1_M3
MT759288.1	B7875	S1	7	S1	source label retained	Salmo salar	Canada	15-Jan-2014		sigma3	QPL20788.1		993	MT759288.1_S1
MT759289.1	B7875	S2	8	S2	source label retained	Salmo salar	Canada	15-Jan-2014		sigma2	QPL20790.1		1263	MT759289.1_S2
MT759290.1	B7875	S3	9	S3	source label retained	Salmo salar	Canada	15-Jan-2014		sigmaNS	QPL20791.1		1065	MT759290.1_S3
MT759291.1	B7875	S4	10	S4	source label retained	Salmo salar	Canada	15-Jan-2014		sigma1	QPL20792.1		948	MT759291.1_S4
MT759294.1	B7877	L1	1	L3	lambda3/RdRp ortholog; canonical PRV L1	Salmo salar	Canada	15-Jan-2014		lambda3	QPL20795.1		3861	MT759294.1_L1
MT759293.1	B7877	L2	2	L2	source label retained	Salmo salar	Canada	15-Jan-2014		lambda2	QPL20794.1		3873	MT759293.1_L2
MT759292.1	B7877	L3	3	L1	lambda1/core-shell ortholog; canonical PRV L3	Salmo salar	Canada	15-Jan-2014		lambda1	QPL20793.1		3849	MT759292.1_L3
MT759295.1	B7877	M1	4	M1	source label retained	Salmo salar	Canada	15-Jan-2014		mu2	QPL20796.1		2283	MT759295.1_M1
MT759296.1	B7877	M2	5	M2	source label retained	Salmo salar	Canada	15-Jan-2014		mu1	QPL20797.1		2070	MT759296.1_M2
MT759297.1	B7877	M3	6	M3	source label retained	Salmo salar	Canada	15-Jan-2014		muNS	QPL20798.1		2298	MT759297.1_M3
MT759298.1	B7877	S1	7	S1	source label retained	Salmo salar	Canada	15-Jan-2014		sigma3	QPL20799.1		993	MT759298.1_S1
MT759299.1	B7877	S2	8	S2	source label retained	Salmo salar	Canada	15-Jan-2014		sigma2	QPL20801.1		1263	MT759299.1_S2
MT759300.1	B7877	S3	9	S3	source label retained	Salmo salar	Canada	15-Jan-2014		sigmaNS	QPL20802.1		1065	MT759300.1_S3
MT759301.1	B7877	S4	10	S4	source label retained	Salmo salar	Canada	15-Jan-2014		sigma1	QPL20803.1		948	MT759301.1_S4
MT759304.1	B7883	L1	1	L3	lambda3/RdRp ortholog; canonical PRV L1	Salmo salar	Canada	15-Jan-2014		lambda3	QPL20806.1		3861	MT759304.1_L1
MT759303.1	B7883	L2	2	L2	source label retained	Salmo salar	Canada	15-Jan-2014		lambda2	QPL20805.1		3873	MT759303.1_L2
MT759302.1	B7883	L3	3	L1	lambda1/core-shell ortholog; canonical PRV L3	Salmo salar	Canada	15-Jan-2014		lambda1	QPL20804.1		3849	MT759302.1_L3
MT759305.1	B7883	M1	4	M1	source label retained	Salmo salar	Canada	15-Jan-2014		mu2	QPL20807.1		2283	MT759305.1_M1
MT759306.1	B7883	M2	5	M2	source label retained	Salmo salar	Canada	15-Jan-2014		mu1	QPL20808.1		2070	MT759306.1_M2
MT759307.1	B7883	M3	6	M3	source label retained	Salmo salar	Canada	15-Jan-2014		muNS	QPL20809.1		2298	MT759307.1_M3
MT759308.1	B7883	S1	7	S1	source label retained	Salmo salar	Canada	15-Jan-2014		sigma3	QPL20810.1		993	MT759308.1_S1
MT759309.1	B7883	S2	8	S2	source label retained	Salmo salar	Canada	15-Jan-2014		sigma2	QPL20812.1		1263	MT759309.1_S2
MT759310.1	B7883	S3	9	S3	source label retained	Salmo salar	Canada	15-Jan-2014		sigmaNS	QPL20813.1		1065	MT759310.1_S3
MT759311.1	B7883	S4	10	S4	source label retained	Salmo salar	Canada	15-Jan-2014		sigma1	QPL20814.1		948	MT759311.1_S4
MT759314.1	B7888	L1	1	L3	lambda3/RdRp ortholog; canonical PRV L1	Salmo salar	Canada	15-Jan-2014		lambda3	QPL20817.1		3861	MT759314.1_L1
MT759313.1	B7888	L2	2	L2	source label retained	Salmo salar	Canada	15-Jan-2014		lambda2	QPL20816.1		3873	MT759313.1_L2
MT759312.1	B7888	L3	3	L1	lambda1/core-shell ortholog; canonical PRV L3	Salmo salar	Canada	15-Jan-2014		lambda1	QPL20815.1		3849	MT759312.1_L3
MT759315.1	B7888	M1	4	M1	source label retained	Salmo salar	Canada	15-Jan-2014		mu2	QPL20818.1		2283	MT759315.1_M1
MT759316.1	B7888	M2	5	M2	source label retained	Salmo salar	Canada	15-Jan-2014		mu1	QPL20819.1		2070	MT759316.1_M2
MT759317.1	B7888	M3	6	M3	source label retained	Salmo salar	Canada	15-Jan-2014		muNS	QPL20820.1		2298	MT759317.1_M3
MT759318.1	B7888	S1	7	S1	source label retained	Salmo salar	Canada	15-Jan-2014		sigma3	QPL20821.1		993	MT759318.1_S1
MT759319.1	B7888	S2	8	S2	source label retained	Salmo salar	Canada	15-Jan-2014		sigma2	QPL20823.1		1263	MT759319.1_S2
MT759320.1	B7888	S3	9	S3	source label retained	Salmo salar	Canada	15-Jan-2014		sigmaNS	QPL20824.1		1065	MT759320.1_S3
MT759321.1	B7888	S4	10	S4	source label retained	Salmo salar	Canada	15-Jan-2014		sigma1	QPL20825.1		948	MT759321.1_S4
MT759184.1	B7910	L1	1	L3	lambda3/RdRp ortholog; canonical PRV L1	Salmo salar	Canada	22-Jan-2014		lambda3	QPL20674.1		3861	MT759184.1_L1
MT759183.1	B7910	L2	2	L2	source label retained	Salmo salar	Canada	22-Jan-2014		lambda2	QPL20673.1		3873	MT759183.1_L2
MT759182.1	B7910	L3	3	L1	lambda1/core-shell ortholog; canonical PRV L3	Salmo salar	Canada	22-Jan-2014		lambda1	QPL20672.1		3849	MT759182.1_L3
MT759185.1	B7910	M1	4	M1	source label retained	Salmo salar	Canada	22-Jan-2014		mu2	QPL20675.1		2283	MT759185.1_M1
MT759186.1	B7910	M2	5	M2	source label retained	Salmo salar	Canada	22-Jan-2014		mu1	QPL20676.1		2070	MT759186.1_M2
MT759187.1	B7910	M3	6	M3	source label retained	Salmo salar	Canada	22-Jan-2014		muNS	QPL20677.1		2298	MT759187.1_M3
MT759188.1	B7910	S1	7	S1	source label retained	Salmo salar	Canada	22-Jan-2014		sigma3	QPL20678.1		993	MT759188.1_S1
MT759189.1	B7910	S2	8	S2	source label retained	Salmo salar	Canada	22-Jan-2014		sigma2	QPL20680.1		1263	MT759189.1_S2
MT759190.1	B7910	S3	9	S3	source label retained	Salmo salar	Canada	22-Jan-2014		sigmaNS	QPL20681.1		1065	MT759190.1_S3
MT759191.1	B7910	S4	10	S4	source label retained	Salmo salar	Canada	22-Jan-2014		sigma1	QPL20682.1		948	MT759191.1_S4
NC_036477.1	CGA280-05	L1	1	L3	lambda3/RdRp ortholog; canonical PRV L1	Atlantic salmon	Chile	Nov-2011	BioProject:PRJNA485481	core RNA-dependent RNA polymerase	YP_009445963.1	CYL32_sL3gp1	3861	NC_036477.1_L1
NC_036468.1	CGA280-05	L2	2	L2	source label retained	Atlantic salmon	Chile	Nov-2011	BioProject:PRJNA485481	core turret protein	YP_009445953.1	CYL32_sL2gp1	3873	NC_036468.1_L2
NC_036476.1	CGA280-05	L3	3	L1	lambda1/core-shell ortholog; canonical PRV L3	Atlantic salmon	Chile	Nov-2011	BioProject:PRJNA485481	core shell protein	YP_009445962.1	CYL32_sL1gp1	3849	NC_036476.1_L3
NC_036469.1	CGA280-05	M1	4	M1	source label retained	Atlantic salmon	Chile	Nov-2011	BioProject:PRJNA485481	core NTPase	YP_009445954.1	CYL32_sM1gp1	2283	NC_036469.1_M1
NC_036470.1	CGA280-05	M2	5	M2	source label retained	Atlantic salmon	Chile	Nov-2011	BioProject:PRJNA485481	outer shell protein	YP_009445955.1	CYL32_sM2gp1	2064	NC_036470.1_M2
NC_036471.1	CGA280-05	M3	6	M3	source label retained	Atlantic salmon	Chile	Nov-2011	BioProject:PRJNA485481	non-structural protein	YP_009445956.1	CYL32_sM3gp1	2259	NC_036471.1_M3
NC_036472.1	CGA280-05	S1	7	S1	source label retained	Atlantic salmon	Chile	Nov-2011	BioProject:PRJNA485481	outer clamp protein	YP_009445957.1	CYL32_sS1gp1	993	NC_036472.1_S1
NC_036473.1	CGA280-05	S2	8	S2	source label retained	Atlantic salmon	Chile	Nov-2011	BioProject:PRJNA485481	core clamp protein	YP_009445959.1	CYL32_sS2gp1	1263	NC_036473.1_S2
NC_036474.1	CGA280-05	S3	9	S3	source label retained	Atlantic salmon	Chile	Nov-2011	BioProject:PRJNA485481	non-structural RNA protein	YP_009445960.1	CYL32_sS3gp1	1065	NC_036474.1_S3
NC_036475.1	CGA280-05	S4	10	S4	source label retained	Atlantic salmon	Chile	Nov-2011	BioProject:PRJNA485481	outer fiber protein	YP_009445961.1	CYL32_sS4gp1	948	NC_036475.1_S4
MT759434.1	D5324	L1	1	L3	lambda3/RdRp ortholog; canonical PRV L1	Oncorhynchus tshawytscha	Canada	09-Oct-2014		lambda3	QPL20949.1		3861	MT759434.1_L1
MT759433.1	D5324	L2	2	L2	source label retained	Oncorhynchus tshawytscha	Canada	09-Oct-2014		lambda2	QPL20948.1		3873	MT759433.1_L2
MT759432.1	D5324	L3	3	L1	lambda1/core-shell ortholog; canonical PRV L3	Oncorhynchus tshawytscha	Canada	09-Oct-2014		lambda1	QPL20947.1		3849	MT759432.1_L3
MT759435.1	D5324	M1	4	M1	source label retained	Oncorhynchus tshawytscha	Canada	09-Oct-2014		mu2	QPL20950.1		2283	MT759435.1_M1
MT759436.1	D5324	M2	5	M2	source label retained	Oncorhynchus tshawytscha	Canada	09-Oct-2014		mu1	QPL20951.1		2070	MT759436.1_M2
MT759437.1	D5324	M3	6	M3	source label retained	Oncorhynchus tshawytscha	Canada	09-Oct-2014		muNS	QPL20952.1		2298	MT759437.1_M3
MT759438.1	D5324	S1	7	S1	source label retained	Oncorhynchus tshawytscha	Canada	09-Oct-2014		sigma3	QPL20953.1		993	MT759438.1_S1
MT759439.1	D5324	S2	8	S2	source label retained	Oncorhynchus tshawytscha	Canada	09-Oct-2014		sigma2	QPL20955.1		1263	MT759439.1_S2
MT759440.1	D5324	S3	9	S3	source label retained	Oncorhynchus tshawytscha	Canada	09-Oct-2014		sigmaNS	QPL20956.1		1065	MT759440.1_S3
MT759441.1	D5324	S4	10	S4	source label retained	Oncorhynchus tshawytscha	Canada	09-Oct-2014		sigma1	QPL20957.1		948	MT759441.1_S4
MK675882.1	FO/41/16	L1	1	L1	lambda3/RdRp ortholog; canonical PRV L1	Salmo salar	Denmark: sea site, Faroe Islands	07-Jan-2016		lambda 3	QCT85132.1		3861	MK675882.1_L1
MK675883.1	FO/41/16	L2	2	L2	source label retained	Salmo salar	Denmark: sea site, Faroe Islands	07-Jan-2016		lambda 2	QCT85139.1		3873	MK675883.1_L2
MK675884.1	FO/41/16	L3	3	L3	lambda1/core-shell ortholog; canonical PRV L3	Salmo salar	Denmark: sea site, Faroe Islands	07-Jan-2016		lambda 1	QCT85146.1		3849	MK675884.1_L3
MK675885.1	FO/41/16	M1	4	M1	source label retained	Salmo salar	Denmark: sea site, Faroe Islands	07-Jan-2016		mu2	QCT85152.1		2283	MK675885.1_M1
MK675886.1	FO/41/16	M2	5	M2	source label retained	Salmo salar	Denmark: sea site, Faroe Islands	07-Jan-2016		mu1	QCT85160.1		2064	MK675886.1_M2
MK675887.1	FO/41/16	M3	6	M3	source label retained	Salmo salar	Denmark: sea site, Faroe Islands	07-Jan-2016		muNS	QCT85167.1		2259	MK675887.1_M3
MK675888.1	FO/41/16	S1	7	S1	source label retained	Salmo salar	Denmark: sea site, Faroe Islands	07-Jan-2016		sigma 3	QCT85180.1		993	MK675888.1_S1
MK675889.1	FO/41/16	S2	8	S2	source label retained	Salmo salar	Denmark: sea site, Faroe Islands	07-Jan-2016		sigma 2	QCT85188.1		1263	MK675889.1_S2
MK675890.1	FO/41/16	S3	9	S3	source label retained	Salmo salar	Denmark: sea site, Faroe Islands	07-Jan-2016		sigma NS	QCT85195.1		1065	MK675890.1_S3
MK675891.1	FO/41/16	S4	10	S4	source label retained	Salmo salar	Denmark: sea site, Faroe Islands	07-Jan-2016		sigma 1	QCT85202.1		948	MK675891.1_S4
MT759454.1	G33	L1	1	L3	lambda3/RdRp ortholog; canonical PRV L1	Oncorhynchus tshawytscha	Canada	10-Sep-2012		lambda3	QPL20971.1		3861	MT759454.1_L1
MT759453.1	G33	L2	2	L2	source label retained	Oncorhynchus tshawytscha	Canada	10-Sep-2012		lambda2	QPL20970.1		3873	MT759453.1_L2
MT759452.1	G33	L3	3	L1	lambda1/core-shell ortholog; canonical PRV L3	Oncorhynchus tshawytscha	Canada	10-Sep-2012		lambda1	QPL20969.1		3849	MT759452.1_L3
MT759455.1	G33	M1	4	M1	source label retained	Oncorhynchus tshawytscha	Canada	10-Sep-2012		mu2	QPL20972.1		2283	MT759455.1_M1
MT759456.1	G33	M2	5	M2	source label retained	Oncorhynchus tshawytscha	Canada	10-Sep-2012		mu1	QPL20973.1		2070	MT759456.1_M2
MT759457.1	G33	M3	6	M3	source label retained	Oncorhynchus tshawytscha	Canada	10-Sep-2012		muNS	QPL20974.1		2298	MT759457.1_M3
MT759458.1	G33	S1	7	S1	source label retained	Oncorhynchus tshawytscha	Canada	10-Sep-2012		sigma3	QPL20975.1		993	MT759458.1_S1
MT759459.1	G33	S2	8	S2	source label retained	Oncorhynchus tshawytscha	Canada	10-Sep-2012		sigma2	QPL20977.1		1263	MT759459.1_S2
MT759460.1	G33	S3	9	S3	source label retained	Oncorhynchus tshawytscha	Canada	10-Sep-2012		sigmaNS	QPL20978.1		1065	MT759460.1_S3
MT759461.1	G33	S4	10	S4	source label retained	Oncorhynchus tshawytscha	Canada	10-Sep-2012		sigma1	QPL20979.1		948	MT759461.1_S4
MT759544.1	G347	L1	1	L3	lambda3/RdRp ortholog; canonical PRV L1	Oncorhynchus tshawytscha	Canada	06-Dec-2012		lambda3	QPL21070.1		3861	MT759544.1_L1
MT759543.1	G347	L2	2	L2	source label retained	Oncorhynchus tshawytscha	Canada	06-Dec-2012		lambda2	QPL21069.1		3873	MT759543.1_L2
MT759542.1	G347	L3	3	L1	lambda1/core-shell ortholog; canonical PRV L3	Oncorhynchus tshawytscha	Canada	06-Dec-2012		lambda1	QPL21068.1		3849	MT759542.1_L3
MT759545.1	G347	M1	4	M1	source label retained	Oncorhynchus tshawytscha	Canada	06-Dec-2012		mu2	QPL21071.1		2283	MT759545.1_M1
MT759546.1	G347	M2	5	M2	source label retained	Oncorhynchus tshawytscha	Canada	06-Dec-2012		mu1	QPL21072.1		2070	MT759546.1_M2
MT759547.1	G347	M3	6	M3	source label retained	Oncorhynchus tshawytscha	Canada	06-Dec-2012		muNS	QPL21073.1		2298	MT759547.1_M3
MT759548.1	G347	S1	7	S1	source label retained	Oncorhynchus tshawytscha	Canada	06-Dec-2012		sigma3	QPL21074.1		993	MT759548.1_S1
MT759549.1	G347	S2	8	S2	source label retained	Oncorhynchus tshawytscha	Canada	06-Dec-2012		sigma2	QPL21076.1		1263	MT759549.1_S2
MT759550.1	G347	S3	9	S3	source label retained	Oncorhynchus tshawytscha	Canada	06-Dec-2012		sigmaNS	QPL21077.1		1065	MT759550.1_S3
MT759551.1	G347	S4	10	S4	source label retained	Oncorhynchus tshawytscha	Canada	06-Dec-2012		sigma1	QPL21078.1		948	MT759551.1_S4
MT778889.1	G364	L1	1	L3	lambda3/RdRp ortholog; canonical PRV L1	Oncorhynchus tshawytscha	Canada	07-Mar-2013		lambda3	QPL21103.1		3861	MT778889.1_L1
MT778888.1	G364	L2	2	L2	source label retained	Oncorhynchus tshawytscha	Canada	07-Mar-2013		lambda2	QPL21102.1		3873	MT778888.1_L2
MT778887.1	G364	L3	3	L1	lambda1/core-shell ortholog; canonical PRV L3	Oncorhynchus tshawytscha	Canada	07-Mar-2013		lambda1	QPL21101.1		3849	MT778887.1_L3
MT778890.1	G364	M1	4	M1	source label retained	Oncorhynchus tshawytscha	Canada	07-Mar-2013		mu2	QPL21104.1		2283	MT778890.1_M1
MT778891.1	G364	M2	5	M2	source label retained	Oncorhynchus tshawytscha	Canada	07-Mar-2013		mu1	QPL21105.1		2070	MT778891.1_M2
MT778892.1	G364	M3	6	M3	source label retained	Oncorhynchus tshawytscha	Canada	07-Mar-2013		muNS	QPL21106.1		2298	MT778892.1_M3
MT778893.1	G364	S1	7	S1	source label retained	Oncorhynchus tshawytscha	Canada	07-Mar-2013		sigma3	QPL21107.1		993	MT778893.1_S1
MT778894.1	G364	S2	8	S2	source label retained	Oncorhynchus tshawytscha	Canada	07-Mar-2013		sigma2	QPL21109.1		1263	MT778894.1_S2
MT778895.1	G364	S3	9	S3	source label retained	Oncorhynchus tshawytscha	Canada	07-Mar-2013		sigmaNS	QPL21110.1		1065	MT778895.1_S3
MT778896.1	G364	S4	10	S4	source label retained	Oncorhynchus tshawytscha	Canada	07-Mar-2013		sigma1	QPL21111.1		948	MT778896.1_S4
MT759524.1	G44	L1	1	L3	lambda3/RdRp ortholog; canonical PRV L1	Salmo salar	Canada	23-Oct-2012		lambda3	QPL21048.1		3861	MT759524.1_L1
MT759523.1	G44	L2	2	L2	source label retained	Salmo salar	Canada	23-Oct-2012		lambda2	QPL21047.1		3873	MT759523.1_L2
MT759522.1	G44	L3	3	L1	lambda1/core-shell ortholog; canonical PRV L3	Salmo salar	Canada	23-Oct-2012		lambda1	QPL21046.1		3849	MT759522.1_L3
MT759525.1	G44	M1	4	M1	source label retained	Salmo salar	Canada	23-Oct-2012		mu2	QPL21049.1		2283	MT759525.1_M1
MT759526.1	G44	M2	5	M2	source label retained	Salmo salar	Canada	23-Oct-2012		mu1	QPL21050.1		2070	MT759526.1_M2
MT759527.1	G44	M3	6	M3	source label retained	Salmo salar	Canada	23-Oct-2012		muNS	QPL21051.1		2298	MT759527.1_M3
MT759528.1	G44	S1	7	S1	source label retained	Salmo salar	Canada	23-Oct-2012		sigma3	QPL21052.1		993	MT759528.1_S1
MT759529.1	G44	S2	8	S2	source label retained	Salmo salar	Canada	23-Oct-2012		sigma2	QPL21054.1		1263	MT759529.1_S2
MT759530.1	G44	S3	9	S3	source label retained	Salmo salar	Canada	23-Oct-2012		sigmaNS	QPL21055.1		1065	MT759530.1_S3
MT759531.1	G44	S4	10	S4	source label retained	Salmo salar	Canada	23-Oct-2012		sigma1	QPL21056.1		948	MT759531.1_S4
MT778899.1	G459	L1	1	L3	lambda3/RdRp ortholog; canonical PRV L1	Oncorhynchus tshawytscha	Canada	07-Mar-2013		lambda3	QPL21114.1		3861	MT778899.1_L1
MT778898.1	G459	L2	2	L2	source label retained	Oncorhynchus tshawytscha	Canada	07-Mar-2013		lambda2	QPL21113.1		3873	MT778898.1_L2
MT778897.1	G459	L3	3	L1	lambda1/core-shell ortholog; canonical PRV L3	Oncorhynchus tshawytscha	Canada	07-Mar-2013		lambda1	QPL21112.1		3849	MT778897.1_L3
MT778900.1	G459	M1	4	M1	source label retained	Oncorhynchus tshawytscha	Canada	07-Mar-2013		mu2	QPL21115.1		2283	MT778900.1_M1
MT778901.1	G459	M2	5	M2	source label retained	Oncorhynchus tshawytscha	Canada	07-Mar-2013		mu1	QPL21116.1		2070	MT778901.1_M2
MT778902.1	G459	M3	6	M3	source label retained	Oncorhynchus tshawytscha	Canada	07-Mar-2013		muNS	QPL21117.1		2298	MT778902.1_M3
MT778903.1	G459	S1	7	S1	source label retained	Oncorhynchus tshawytscha	Canada	07-Mar-2013		sigma3	QPL21118.1		993	MT778903.1_S1
MT778904.1	G459	S2	8	S2	source label retained	Oncorhynchus tshawytscha	Canada	07-Mar-2013		sigma2	QPL21120.1		1263	MT778904.1_S2
MT778905.1	G459	S3	9	S3	source label retained	Oncorhynchus tshawytscha	Canada	07-Mar-2013		sigmaNS	QPL21121.1		1065	MT778905.1_S3
MT778906.1	G459	S4	10	S4	source label retained	Oncorhynchus tshawytscha	Canada	07-Mar-2013		sigma1	QPL21122.1		948	MT778906.1_S4
MT759534.1	G463	L1	1	L3	lambda3/RdRp ortholog; canonical PRV L1	Salmo salar	Canada	18-Feb-2013		lambda3	QPL21059.1		3861	MT759534.1_L1
MT759533.1	G463	L2	2	L2	source label retained	Salmo salar	Canada	18-Feb-2013		lambda2	QPL21058.1		3873	MT759533.1_L2
MT759532.1	G463	L3	3	L1	lambda1/core-shell ortholog; canonical PRV L3	Salmo salar	Canada	18-Feb-2013		lambda1	QPL21057.1		3849	MT759532.1_L3
MT759535.1	G463	M1	4	M1	source label retained	Salmo salar	Canada	18-Feb-2013		mu2	QPL21060.1		2283	MT759535.1_M1
MT759536.1	G463	M2	5	M2	source label retained	Salmo salar	Canada	18-Feb-2013		mu1	QPL21061.1		2070	MT759536.1_M2
MT759537.1	G463	M3	6	M3	source label retained	Salmo salar	Canada	18-Feb-2013		muNS	QPL21062.1		2298	MT759537.1_M3
MT759538.1	G463	S1	7	S1	source label retained	Salmo salar	Canada	18-Feb-2013		sigma3	QPL21063.1		993	MT759538.1_S1
MT759539.1	G463	S2	8	S2	source label retained	Salmo salar	Canada	18-Feb-2013		sigma2	QPL21065.1		1263	MT759539.1_S2
MT759540.1	G463	S3	9	S3	source label retained	Salmo salar	Canada	18-Feb-2013		sigmaNS	QPL21066.1		1065	MT759540.1_S3
MT759541.1	G463	S4	10	S4	source label retained	Salmo salar	Canada	18-Feb-2013		sigma1	QPL21067.1		948	MT759541.1_S4
MT759484.1	G523	L1	1	L3	lambda3/RdRp ortholog; canonical PRV L1	Salmo salar	Canada	08-Nov-2011		lambda3	QPL21004.1		3861	MT759484.1_L1
MT759483.1	G523	L2	2	L2	source label retained	Salmo salar	Canada	08-Nov-2011		lambda2	QPL21003.1		3873	MT759483.1_L2
MT759482.1	G523	L3	3	L1	lambda1/core-shell ortholog; canonical PRV L3	Salmo salar	Canada	08-Nov-2011		lambda1	QPL21002.1		3849	MT759482.1_L3
MT759485.1	G523	M1	4	M1	source label retained	Salmo salar	Canada	08-Nov-2011		mu2	QPL21005.1		2283	MT759485.1_M1
MT759486.1	G523	M2	5	M2	source label retained	Salmo salar	Canada	08-Nov-2011		mu1	QPL21006.1		2070	MT759486.1_M2
MT759487.1	G523	M3	6	M3	source label retained	Salmo salar	Canada	08-Nov-2011		muNS	QPL21007.1		2298	MT759487.1_M3
MT759488.1	G523	S1	7	S1	source label retained	Salmo salar	Canada	08-Nov-2011		sigma3	QPL21008.1		993	MT759488.1_S1
MT759489.1	G523	S2	8	S2	source label retained	Salmo salar	Canada	08-Nov-2011		sigma2	QPL21010.1		1263	MT759489.1_S2
MT759490.1	G523	S3	9	S3	source label retained	Salmo salar	Canada	08-Nov-2011		sigmaNS	QPL21011.1		1065	MT759490.1_S3
MT759491.1	G523	S4	10	S4	source label retained	Salmo salar	Canada	08-Nov-2011		sigma1	QPL21012.1		948	MT759491.1_S4
MT759124.1	G537	L1	1	L3	lambda3/RdRp ortholog; canonical PRV L1	Oncorhynchus tshawytscha	Canada	11-Jan-2012		lambda3	QPL20608.1		3861	MT759124.1_L1
MT759123.1	G537	L2	2	L2	source label retained	Oncorhynchus tshawytscha	Canada	11-Jan-2012		lambda2	QPL20607.1		3873	MT759123.1_L2
MT759122.1	G537	L3	3	L1	lambda1/core-shell ortholog; canonical PRV L3	Oncorhynchus tshawytscha	Canada	11-Jan-2012		lambda1	QPL20606.1		3849	MT759122.1_L3
MT759125.1	G537	M1	4	M1	source label retained	Oncorhynchus tshawytscha	Canada	11-Jan-2012		mu2	QPL20609.1		2283	MT759125.1_M1
MT759126.1	G537	M2	5	M2	source label retained	Oncorhynchus tshawytscha	Canada	11-Jan-2012		mu1	QPL20610.1		2070	MT759126.1_M2
MT759127.1	G537	M3	6	M3	source label retained	Oncorhynchus tshawytscha	Canada	11-Jan-2012		muNS	QPL20611.1		2298	MT759127.1_M3
MT759128.1	G537	S1	7	S1	source label retained	Oncorhynchus tshawytscha	Canada	11-Jan-2012		sigma3	QPL20612.1		993	MT759128.1_S1
MT759129.1	G537	S2	8	S2	source label retained	Oncorhynchus tshawytscha	Canada	11-Jan-2012		sigma2	QPL20614.1		1263	MT759129.1_S2
MT759130.1	G537	S3	9	S3	source label retained	Oncorhynchus tshawytscha	Canada	11-Jan-2012		sigmaNS	QPL20615.1		1065	MT759130.1_S3
MT759131.1	G537	S4	10	S4	source label retained	Oncorhynchus tshawytscha	Canada	11-Jan-2012		sigma1	QPL20616.1		948	MT759131.1_S4
MT778909.1	G563	L1	1	L3	lambda3/RdRp ortholog; canonical PRV L1	Oncorhynchus tshawytscha	Canada	06-Jun-2013		lambda3	QPL21125.1		3861	MT778909.1_L1
MT778908.1	G563	L2	2	L2	source label retained	Oncorhynchus tshawytscha	Canada	06-Jun-2013		lambda2	QPL21124.1		3873	MT778908.1_L2
MT778907.1	G563	L3	3	L1	lambda1/core-shell ortholog; canonical PRV L3	Oncorhynchus tshawytscha	Canada	06-Jun-2013		lambda1	QPL21123.1		3849	MT778907.1_L3
MT778910.1	G563	M1	4	M1	source label retained	Oncorhynchus tshawytscha	Canada	06-Jun-2013		mu2	QPL21126.1		2283	MT778910.1_M1
MT778911.1	G563	M2	5	M2	source label retained	Oncorhynchus tshawytscha	Canada	06-Jun-2013		mu1	QPL21127.1		2070	MT778911.1_M2
MT778912.1	G563	M3	6	M3	source label retained	Oncorhynchus tshawytscha	Canada	06-Jun-2013		muNS	QPL21128.1		2298	MT778912.1_M3
MT778913.1	G563	S1	7	S1	source label retained	Oncorhynchus tshawytscha	Canada	06-Jun-2013		sigma3	QPL21129.1		993	MT778913.1_S1
MT778914.1	G563	S2	8	S2	source label retained	Oncorhynchus tshawytscha	Canada	06-Jun-2013		sigma2	QPL21131.1		1263	MT778914.1_S2
MT778915.1	G563	S3	9	S3	source label retained	Oncorhynchus tshawytscha	Canada	06-Jun-2013		sigmaNS	QPL21132.1		1065	MT778915.1_S3
MT778916.1	G563	S4	10	S4	source label retained	Oncorhynchus tshawytscha	Canada	06-Jun-2013		sigma1	QPL21133.1		948	MT778916.1_S4
MT778919.1	G572	L1	1	L3	lambda3/RdRp ortholog; canonical PRV L1	Oncorhynchus tshawytscha	Canada	25-Jul-2013		lambda3	QPL21136.1		3861	MT778919.1_L1
MT778918.1	G572	L2	2	L2	source label retained	Oncorhynchus tshawytscha	Canada	25-Jul-2013		lambda2	QPL21135.1		3873	MT778918.1_L2
MT778917.1	G572	L3	3	L1	lambda1/core-shell ortholog; canonical PRV L3	Oncorhynchus tshawytscha	Canada	25-Jul-2013		lambda1	QPL21134.1		3849	MT778917.1_L3
MT778920.1	G572	M1	4	M1	source label retained	Oncorhynchus tshawytscha	Canada	25-Jul-2013		mu2	QPL21137.1		2283	MT778920.1_M1
MT778921.1	G572	M2	5	M2	source label retained	Oncorhynchus tshawytscha	Canada	25-Jul-2013		mu1	QPL21138.1		2070	MT778921.1_M2
MT778922.1	G572	M3	6	M3	source label retained	Oncorhynchus tshawytscha	Canada	25-Jul-2013		muNS	QPL21139.1		2298	MT778922.1_M3
MT778923.1	G572	S1	7	S1	source label retained	Oncorhynchus tshawytscha	Canada	25-Jul-2013		sigma3	QPL21140.1		993	MT778923.1_S1
MT778924.1	G572	S2	8	S2	source label retained	Oncorhynchus tshawytscha	Canada	25-Jul-2013		sigma2	QPL21142.1		1263	MT778924.1_S2
MT778925.1	G572	S3	9	S3	source label retained	Oncorhynchus tshawytscha	Canada	25-Jul-2013		sigmaNS	QPL21143.1		1065	MT778925.1_S3
MT778926.1	G572	S4	10	S4	source label retained	Oncorhynchus tshawytscha	Canada	25-Jul-2013		sigma1	QPL21144.1		948	MT778926.1_S4
MT778929.1	G578	L1	1	L3	lambda3/RdRp ortholog; canonical PRV L1	Oncorhynchus tshawytscha	Canada	11-Apr-2011		lambda3	QPL21147.1		3861	MT778929.1_L1
MT778928.1	G578	L2	2	L2	source label retained	Oncorhynchus tshawytscha	Canada	11-Apr-2011		lambda2	QPL21146.1		3873	MT778928.1_L2
MT778927.1	G578	L3	3	L1	lambda1/core-shell ortholog; canonical PRV L3	Oncorhynchus tshawytscha	Canada	11-Apr-2011		lambda1	QPL21145.1		3849	MT778927.1_L3
MT778930.1	G578	M1	4	M1	source label retained	Oncorhynchus tshawytscha	Canada	11-Apr-2011		mu2	QPL21148.1		2283	MT778930.1_M1
MT778931.1	G578	M2	5	M2	source label retained	Oncorhynchus tshawytscha	Canada	11-Apr-2011		mu1	QPL21149.1		2070	MT778931.1_M2
MT778932.1	G578	M3	6	M3	source label retained	Oncorhynchus tshawytscha	Canada	11-Apr-2011		muNS	QPL21150.1		2298	MT778932.1_M3
MT778933.1	G578	S1	7	S1	source label retained	Oncorhynchus tshawytscha	Canada	11-Apr-2011		sigma3	QPL21151.1		993	MT778933.1_S1
MT778934.1	G578	S2	8	S2	source label retained	Oncorhynchus tshawytscha	Canada	11-Apr-2011		sigma2	QPL21153.1		1263	MT778934.1_S2
MT778935.1	G578	S3	9	S3	source label retained	Oncorhynchus tshawytscha	Canada	11-Apr-2011		sigmaNS	QPL21154.1		1065	MT778935.1_S3
MT778936.1	G578	S4	10	S4	source label retained	Oncorhynchus tshawytscha	Canada	11-Apr-2011		sigma1	QPL21155.1		948	MT778936.1_S4
MT759444.1	G677	L1	1	L3	lambda3/RdRp ortholog; canonical PRV L1	Oncorhynchus tshawytscha	Canada	29-Apr-2011		lambda3	QPL20960.1		3861	MT759444.1_L1
MT759443.1	G677	L2	2	L2	source label retained	Oncorhynchus tshawytscha	Canada	29-Apr-2011		lambda2	QPL20959.1		3873	MT759443.1_L2
MT759442.1	G677	L3	3	L1	lambda1/core-shell ortholog; canonical PRV L3	Oncorhynchus tshawytscha	Canada	29-Apr-2011		lambda1	QPL20958.1		3849	MT759442.1_L3
MT759445.1	G677	M1	4	M1	source label retained	Oncorhynchus tshawytscha	Canada	29-Apr-2011		mu2	QPL20961.1		2283	MT759445.1_M1
MT759446.1	G677	M2	5	M2	source label retained	Oncorhynchus tshawytscha	Canada	29-Apr-2011		mu1	QPL20962.1		2070	MT759446.1_M2
MT759447.1	G677	M3	6	M3	source label retained	Oncorhynchus tshawytscha	Canada	29-Apr-2011		muNS	QPL20963.1		2298	MT759447.1_M3
MT759448.1	G677	S1	7	S1	source label retained	Oncorhynchus tshawytscha	Canada	29-Apr-2011		sigma3	QPL20964.1		993	MT759448.1_S1
MT759449.1	G677	S2	8	S2	source label retained	Oncorhynchus tshawytscha	Canada	29-Apr-2011		sigma2	QPL20966.1		1263	MT759449.1_S2
MT759450.1	G677	S3	9	S3	source label retained	Oncorhynchus tshawytscha	Canada	29-Apr-2011		sigmaNS	QPL20967.1		1065	MT759450.1_S3
MT759451.1	G677	S4	10	S4	source label retained	Oncorhynchus tshawytscha	Canada	29-Apr-2011		sigma1	QPL20968.1		948	MT759451.1_S4
MT758884.1	G707	L1	1	L3	lambda3/RdRp ortholog; canonical PRV L1	Salmo salar	Canada	13-Oct-2011		lambda3	QPL20344.1		3861	MT758884.1_L1
MT758883.1	G707	L2	2	L2	source label retained	Salmo salar	Canada	13-Oct-2011		lambda2	QPL20343.1		3873	MT758883.1_L2
MT758882.1	G707	L3	3	L1	lambda1/core-shell ortholog; canonical PRV L3	Salmo salar	Canada	13-Oct-2011		lambda1	QPL20342.1		3849	MT758882.1_L3
MT758885.1	G707	M1	4	M1	source label retained	Salmo salar	Canada	13-Oct-2011		mu2	QPL20345.1		2283	MT758885.1_M1
MT758886.1	G707	M2	5	M2	source label retained	Salmo salar	Canada	13-Oct-2011		mu1	QPL20346.1		2070	MT758886.1_M2
MT758887.1	G707	M3	6	M3	source label retained	Salmo salar	Canada	13-Oct-2011		muNS	QPL20347.1		2298	MT758887.1_M3
MT758888.1	G707	S1	7	S1	source label retained	Salmo salar	Canada	13-Oct-2011		sigma3	QPL20348.1		993	MT758888.1_S1
MT758889.1	G707	S2	8	S2	source label retained	Salmo salar	Canada	13-Oct-2011		sigma2	QPL20350.1		1263	MT758889.1_S2
MT758890.1	G707	S3	9	S3	source label retained	Salmo salar	Canada	13-Oct-2011		sigmaNS	QPL20351.1		1065	MT758890.1_S3
MT758891.1	G707	S4	10	S4	source label retained	Salmo salar	Canada	13-Oct-2011		sigma1	QPL20352.1		948	MT758891.1_S4
MT759474.1	G712	L1	1	L3	lambda3/RdRp ortholog; canonical PRV L1	Salmo salar	Canada	08-Nov-2011		lambda3	QPL20993.1		3861	MT759474.1_L1
MT759473.1	G712	L2	2	L2	source label retained	Salmo salar	Canada	08-Nov-2011		lambda2	QPL20992.1		3873	MT759473.1_L2
MT759472.1	G712	L3	3	L1	lambda1/core-shell ortholog; canonical PRV L3	Salmo salar	Canada	08-Nov-2011		lambda1	QPL20991.1		3849	MT759472.1_L3
MT759475.1	G712	M1	4	M1	source label retained	Salmo salar	Canada	08-Nov-2011		mu2	QPL20994.1		2283	MT759475.1_M1
MT759476.1	G712	M2	5	M2	source label retained	Salmo salar	Canada	08-Nov-2011		mu1	QPL20995.1		2070	MT759476.1_M2
MT759477.1	G712	M3	6	M3	source label retained	Salmo salar	Canada	08-Nov-2011		muNS	QPL20996.1		2298	MT759477.1_M3
MT759478.1	G712	S1	7	S1	source label retained	Salmo salar	Canada	08-Nov-2011		sigma3	QPL20997.1		993	MT759478.1_S1
MT759479.1	G712	S2	8	S2	source label retained	Salmo salar	Canada	08-Nov-2011		sigma2	QPL20999.1		1263	MT759479.1_S2
MT759480.1	G712	S3	9	S3	source label retained	Salmo salar	Canada	08-Nov-2011		sigmaNS	QPL21000.1		1065	MT759480.1_S3
MT759481.1	G712	S4	10	S4	source label retained	Salmo salar	Canada	08-Nov-2011		sigma1	QPL21001.1		948	MT759481.1_S4
MT778939.1	G722	L1	1	L3	lambda3/RdRp ortholog; canonical PRV L1	Oncorhynchus tshawytscha	Canada	25-Nov-2011		lambda3	QPL21158.1		3861	MT778939.1_L1
MT778938.1	G722	L2	2	L2	source label retained	Oncorhynchus tshawytscha	Canada	25-Nov-2011		lambda2	QPL21157.1		3873	MT778938.1_L2
MT778937.1	G722	L3	3	L1	lambda1/core-shell ortholog; canonical PRV L3	Oncorhynchus tshawytscha	Canada	25-Nov-2011		lambda1	QPL21156.1		3849	MT778937.1_L3
MT778940.1	G722	M1	4	M1	source label retained	Oncorhynchus tshawytscha	Canada	25-Nov-2011		mu2	QPL21159.1		2283	MT778940.1_M1
MT778941.1	G722	M2	5	M2	source label retained	Oncorhynchus tshawytscha	Canada	25-Nov-2011		mu1	QPL21160.1		2070	MT778941.1_M2
MT778942.1	G722	M3	6	M3	source label retained	Oncorhynchus tshawytscha	Canada	25-Nov-2011		muNS	QPL21161.1		2298	MT778942.1_M3
MT778943.1	G722	S1	7	S1	source label retained	Oncorhynchus tshawytscha	Canada	25-Nov-2011		sigma3	QPL21162.1		993	MT778943.1_S1
MT778944.1	G722	S2	8	S2	source label retained	Oncorhynchus tshawytscha	Canada	25-Nov-2011		sigma2	QPL21164.1		1263	MT778944.1_S2
MT778945.1	G722	S3	9	S3	source label retained	Oncorhynchus tshawytscha	Canada	25-Nov-2011		sigmaNS	QPL21165.1		1065	MT778945.1_S3
MT778946.1	G722	S4	10	S4	source label retained	Oncorhynchus tshawytscha	Canada	25-Nov-2011		sigma1	QPL21166.1		948	MT778946.1_S4
MT759504.1	G725	L1	1	L3	lambda3/RdRp ortholog; canonical PRV L1	Salmo salar	Canada	29-Nov-2011		lambda3	QPL21026.1		3861	MT759504.1_L1
MT759503.1	G725	L2	2	L2	source label retained	Salmo salar	Canada	29-Nov-2011		lambda2	QPL21025.1		3873	MT759503.1_L2
MT759502.1	G725	L3	3	L1	lambda1/core-shell ortholog; canonical PRV L3	Salmo salar	Canada	29-Nov-2011		lambda1	QPL21024.1		3849	MT759502.1_L3
MT759505.1	G725	M1	4	M1	source label retained	Salmo salar	Canada	29-Nov-2011		mu2	QPL21027.1		2283	MT759505.1_M1
MT759506.1	G725	M2	5	M2	source label retained	Salmo salar	Canada	29-Nov-2011		mu1	QPL21028.1		2070	MT759506.1_M2
MT759507.1	G725	M3	6	M3	source label retained	Salmo salar	Canada	29-Nov-2011		muNS	QPL21029.1		2298	MT759507.1_M3
MT759508.1	G725	S1	7	S1	source label retained	Salmo salar	Canada	29-Nov-2011		sigma3	QPL21030.1		993	MT759508.1_S1
MT759509.1	G725	S2	8	S2	source label retained	Salmo salar	Canada	29-Nov-2011		sigma2	QPL21032.1		1263	MT759509.1_S2
MT759510.1	G725	S3	9	S3	source label retained	Salmo salar	Canada	29-Nov-2011		sigmaNS	QPL21033.1		1065	MT759510.1_S3
MT759511.1	G725	S4	10	S4	source label retained	Salmo salar	Canada	29-Nov-2011		sigma1	QPL21034.1		948	MT759511.1_S4
MK675862.1	NOR-1988	L1	1	L1	lambda3/RdRp ortholog; canonical PRV L1	Salmo salar	Norway	1988		lambda 3	QCT85130.1		3861	MK675862.1_L1
MK675863.1	NOR-1988	L2	2	L2	source label retained	Salmo salar	Norway	1988		lambda 2	QCT85137.1		3873	MK675863.1_L2
MK675864.1	NOR-1988	L3	3	L3	lambda1/core-shell ortholog; canonical PRV L3	Salmo salar	Norway	1988		lambda 1	QCT85144.1		3849	MK675864.1_L3
MK675865.1	NOR-1988	M1	4	M1	source label retained	Salmo salar	Norway	1988		mu2	QCT85151.1		2283	MK675865.1_M1
MK675866.1	NOR-1988	M2	5	M2	source label retained	Salmo salar	Norway	1988		mu1	QCT85158.1		2064	MK675866.1_M2
MK675867.1	NOR-1988	M3	6	M3	source label retained	Salmo salar	Norway	1988		muNS	QCT85165.1		2259	MK675867.1_M3
MK675868.1	NOR-1988	S1	7	S1	source label retained	Salmo salar	Norway	1988		sigma 3	QCT85176.1		993	MK675868.1_S1
MK675869.1	NOR-1988	S2	8	S2	source label retained	Salmo salar	Norway	1988		sigma 2	QCT85186.1		1263	MK675869.1_S2
MK675870.1	NOR-1988	S3	9	S3	source label retained	Salmo salar	Norway	1988		sigma NS	QCT85193.1		1065	MK675870.1_S3
MK675871.1	NOR-1988	S4	10	S4	source label retained	Salmo salar	Norway	1988		sigma 1	QCT85200.1		948	MK675871.1_S4
MK675842.1	NOR-2015/MS	L1	1	L1	lambda3/RdRp ortholog; canonical PRV L1	Salmo salar	Norway: Matre; Sjo	2015		lambda 3	QCT85128.1		3861	MK675842.1_L1
MK675843.1	NOR-2015/MS	L2	2	L2	source label retained	Salmo salar	Norway: Matre; Sjo	2015		lambda 2	QCT85135.1		3873	MK675843.1_L2
MK675844.1	NOR-2015/MS	L3	3	L3	lambda1/core-shell ortholog; canonical PRV L3	Salmo salar	Norway: Matre; Sjo	2015		lambda 1	QCT85142.1		3849	MK675844.1_L3
MK675845.1	NOR-2015/MS	M1	4	M1	source label retained	Salmo salar	Norway: Matre; Sjo	2015		mu2	QCT85149.1		2283	MK675845.1_M1
MK675846.1	NOR-2015/MS	M2	5	M2	source label retained	Salmo salar	Norway: Matre; Sjo	2015		mu1	QCT85156.1		2064	MK675846.1_M2
MK675847.1	NOR-2015/MS	M3	6	M3	source label retained	Salmo salar	Norway: Matre; Sjo	2015		muNS	QCT85163.1		2259	MK675847.1_M3
MK675848.1	NOR-2015/MS	S1	7	S1	source label retained	Salmo salar	Norway: Matre; Sjo	2015		sigma 3	QCT85172.1		993	MK675848.1_S1
MK675849.1	NOR-2015/MS	S2	8	S2	source label retained	Salmo salar	Norway: Matre; Sjo	2015		sigma 2	QCT85184.1		1263	MK675849.1_S2
MK675850.1	NOR-2015/MS	S3	9	S3	source label retained	Salmo salar	Norway: Matre; Sjo	2015		sigma NS	QCT85191.1		1065	MK675850.1_S3
MK675851.1	NOR-2015/MS	S4	10	S4	source label retained	Salmo salar	Norway: Matre; Sjo	2015		sigma 1	QCT85198.1		948	MK675851.1_S4
MT759554.1	S1003	L1	1	L3	lambda3/RdRp ortholog; canonical PRV L1	Oncorhynchus tshawytscha	Canada	07-Feb-2011		lambda3	QPL21081.1		3861	MT759554.1_L1
MT759553.1	S1003	L2	2	L2	source label retained	Oncorhynchus tshawytscha	Canada	07-Feb-2011		lambda2	QPL21080.1		3873	MT759553.1_L2
MT759552.1	S1003	L3	3	L1	lambda1/core-shell ortholog; canonical PRV L3	Oncorhynchus tshawytscha	Canada	07-Feb-2011		lambda1	QPL21079.1		3849	MT759552.1_L3
MT759555.1	S1003	M1	4	M1	source label retained	Oncorhynchus tshawytscha	Canada	07-Feb-2011		mu2	QPL21082.1		2283	MT759555.1_M1
MT759556.1	S1003	M2	5	M2	source label retained	Oncorhynchus tshawytscha	Canada	07-Feb-2011		mu1	QPL21083.1		2070	MT759556.1_M2
MT759557.1	S1003	M3	6	M3	source label retained	Oncorhynchus tshawytscha	Canada	07-Feb-2011		muNS	QPL21084.1		2298	MT759557.1_M3
MT759558.1	S1003	S1	7	S1	source label retained	Oncorhynchus tshawytscha	Canada	07-Feb-2011		sigma3	QPL21085.1		993	MT759558.1_S1
MT759559.1	S1003	S2	8	S2	source label retained	Oncorhynchus tshawytscha	Canada	07-Feb-2011		sigma2	QPL21087.1		1263	MT759559.1_S2
MT759560.1	S1003	S3	9	S3	source label retained	Oncorhynchus tshawytscha	Canada	07-Feb-2011		sigmaNS	QPL21088.1		1065	MT759560.1_S3
MT759561.1	S1003	S4	10	S4	source label retained	Oncorhynchus tshawytscha	Canada	07-Feb-2011		sigma1	QPL21089.1		948	MT759561.1_S4
MT759564.1	S1053	L1	1	L3	lambda3/RdRp ortholog; canonical PRV L1	Oncorhynchus tshawytscha	Canada	24-May-2011		lambda3	QPL21092.1		3861	MT759564.1_L1
MT759563.1	S1053	L2	2	L2	source label retained	Oncorhynchus tshawytscha	Canada	24-May-2011		lambda2	QPL21091.1		3873	MT759563.1_L2
MT759562.1	S1053	L3	3	L1	lambda1/core-shell ortholog; canonical PRV L3	Oncorhynchus tshawytscha	Canada	24-May-2011		lambda1	QPL21090.1		3849	MT759562.1_L3
MT759565.1	S1053	M1	4	M1	source label retained	Oncorhynchus tshawytscha	Canada	24-May-2011		mu2	QPL21093.1		2283	MT759565.1_M1
MT759566.1	S1053	M2	5	M2	source label retained	Oncorhynchus tshawytscha	Canada	24-May-2011		mu1	QPL21094.1		2070	MT759566.1_M2
MT759567.1	S1053	M3	6	M3	source label retained	Oncorhynchus tshawytscha	Canada	24-May-2011		muNS	QPL21095.1		2298	MT759567.1_M3
MT759568.1	S1053	S1	7	S1	source label retained	Oncorhynchus tshawytscha	Canada	24-May-2011		sigma3	QPL21096.1		993	MT759568.1_S1
MT759569.1	S1053	S2	8	S2	source label retained	Oncorhynchus tshawytscha	Canada	24-May-2011		sigma2	QPL21098.1		1263	MT759569.1_S2
MT759570.1	S1053	S3	9	S3	source label retained	Oncorhynchus tshawytscha	Canada	24-May-2011		sigmaNS	QPL21099.1		1065	MT759570.1_S3
MT759571.1	S1053	S4	10	S4	source label retained	Oncorhynchus tshawytscha	Canada	24-May-2011		sigma1	QPL21100.1		948	MT759571.1_S4
KC715681.1	VT06062012-358	L1	1	L3	lambda3/RdRp ortholog; canonical PRV L1	Atlantic salmon	Canada	Jun-2012		core RNA-dependent RNA polymerase	AGR27917.1		3861	KC715681.1_L1
KC715680.1	VT06062012-358	L2	2	L2	source label retained	Atlantic salmon	Canada	Jun-2012		core turret protein	AGR27916.1		3873	KC715680.1_L2
KC715679.1	VT06062012-358	L3	3	L1	lambda1/core-shell ortholog; canonical PRV L3	Atlantic salmon	Canada	Jun-2012		core shell protein	AGR27915.1		3849	KC715679.1_L3
KC715682.1	VT06062012-358	M1	4	M1	source label retained	Atlantic salmon	Canada	Jun-2012		core NTPase	AGR27918.1		2283	KC715682.1_M1
KC715683.1	VT06062012-358	M2	5	M2	source label retained	Atlantic salmon	Canada	Jun-2012		outer shell protein	AGR27919.1		2064	KC715683.1_M2
KC715684.1	VT06062012-358	M3	6	M3	source label retained	Atlantic salmon	Canada	Jun-2012		non-structural factory protein	AGR27920.1		2259	KC715684.1_M3
KC473453.1	VT06062012-358	S1	7	S1	source label retained	Atlantic salmon	Canada			sigma 1	AGR27894.1		993	KC473453.1_S1
KC715685.1	VT06062012-358	S2	8	S2	source label retained	Atlantic salmon	Canada	Jun-2012		core clamp protein	AGR27921.1		1263	KC715685.1_S2
KC715686.1	VT06062012-358	S3	9	S3	source label retained	Atlantic salmon	Canada	Jun-2012		non-structural RNA protein	AGR27922.1		1065	KC715686.1_S3
KC715687.1	VT06062012-358	S4	10	S4	source label retained	Atlantic salmon	Canada	Jun-2012		outer fiber protein	AGR27923.1		948	KC715687.1_S4
KC776258.1	VT06202012-371	L1	1	L3	lambda3/RdRp ortholog; canonical PRV L1	Atlantic salmon	Canada	Jun-2012		core RNA-dependent RNA polymerase	AGR27926.1		3861	KC776258.1_L1
KC776257.1	VT06202012-371	L2	2	L2	source label retained	Atlantic salmon	Canada	Jun-2012		core turret protein	AGR27925.1		3873	KC776257.1_L2
KC776256.1	VT06202012-371	L3	3	L1	lambda1/core-shell ortholog; canonical PRV L3	Atlantic salmon	Canada	Jun-2012		core shell protein	AGR27924.1		3849	KC776256.1_L3
KC776259.1	VT06202012-371	M1	4	M1	source label retained	Atlantic salmon	Canada	Jun-2012		core NTPase	AGR27927.1		2283	KC776259.1_M1
KC776260.1	VT06202012-371	M2	5	M2	source label retained	Atlantic salmon	Canada	Jun-2012		outer shell protein	AGR27928.1		2064	KC776260.1_M2
KC776261.1	VT06202012-371	M3	6	M3	source label retained	Atlantic salmon	Canada	Jun-2012		non-structural (NS) factory protein	AGR27929.1		2259	KC776261.1_M3
KC473454.1	VT06202012-371	S1	7	S1	source label retained	Atlantic salmon	Canada			sigma 1	AGR27897.1		993	KC473454.1_S1
KC776262.1	VT06202012-371	S2	8	S2	source label retained	Atlantic salmon	Canada	Jun-2012		core clamp protein	AGR27930.1		1263	KC776262.1_S2
KC776263.1	VT06202012-371	S3	9	S3	source label retained	Atlantic salmon	Canada	Jun-2012		non-structural (NS) RNA protein	AGR27931.1		1065	KC776263.1_S3
KC776264.1	VT06202012-371	S4	10	S4	source label retained	Atlantic salmon	Canada	Jun-2012		outer fiber protein	AGR27932.1		948	KC776264.1_S4
MW354788.1	mDa115	L1	1	L1	lambda3/RdRp ortholog; canonical PRV L1	Salmo salar	Norway	2018		lambda 3	QWL54992.1		3861	MW354788.1_L1
MW354800.1	mDa115	L2	2	L2	source label retained	Salmo salar	Norway	2018		lambda 2	QWL55004.1		3873	MW354800.1_L2
MW354812.1	mDa115	L3	3	L3	lambda1/core-shell ortholog; canonical PRV L3	Salmo salar	Norway	2018		lambda 1	QWL55016.1		3849	MW354812.1_L3
MW354824.1	mDa115	M1	4	M1	source label retained	Salmo salar	Norway	2018		mu2	QWL55028.1		2283	MW354824.1_M1
MW354836.1	mDa115	M2	5	M2	source label retained	Salmo salar	Norway	2018		mu1	QWL55040.1		2064	MW354836.1_M2
MW354848.1	mDa115	M3	6	M3	source label retained	Salmo salar	Norway	2018		muNS	QWL55052.1		2259	MW354848.1_M3
MW354860.1	mDa115	S1	7	S1	source label retained	Salmo salar	Norway	2018		sigma 3	QWL55067.1		993	MW354860.1_S1
MW354872.1	mDa115	S2	8	S2	source label retained	Salmo salar	Norway	2018		sigma 2	QWL55088.1		1263	MW354872.1_S2
MW354884.1	mDa115	S3	9	S3	source label retained	Salmo salar	Norway	2018		sigma NS	QWL55100.1		1065	MW354884.1_S3
MW354896.1	mDa115	S4	10	S4	source label retained	Salmo salar	Norway	2018		sigma 1	QWL55112.1		948	MW354896.1_S4
MW354790.1	mGl118	L1	1	L1	lambda3/RdRp ortholog; canonical PRV L1	Salmo salar	Norway	2018		lambda 3	QWL54994.1		3861	MW354790.1_L1
MW354802.1	mGl118	L2	2	L2	source label retained	Salmo salar	Norway	2018		lambda 2	QWL55006.1		3873	MW354802.1_L2
MW354814.1	mGl118	L3	3	L3	lambda1/core-shell ortholog; canonical PRV L3	Salmo salar	Norway	2018		lambda 1	QWL55018.1		3849	MW354814.1_L3
MW354826.1	mGl118	M1	4	M1	source label retained	Salmo salar	Norway	2018		mu2	QWL55030.1		2283	MW354826.1_M1
MW354838.1	mGl118	M2	5	M2	source label retained	Salmo salar	Norway	2018		mu1	QWL55042.1		2064	MW354838.1_M2
MW354850.1	mGl118	M3	6	M3	source label retained	Salmo salar	Norway	2018		muNS	QWL55054.1		2259	MW354850.1_M3
MW354862.1	mGl118	S1	7	S1	source label retained	Salmo salar	Norway	2018		sigma 3	QWL55071.1		993	MW354862.1_S1
MW354874.1	mGl118	S2	8	S2	source label retained	Salmo salar	Norway	2018		sigma 2	QWL55090.1		1263	MW354874.1_S2
MW354886.1	mGl118	S3	9	S3	source label retained	Salmo salar	Norway	2018		sigma NS	QWL55102.1		1065	MW354886.1_S3
MW354898.1	mGl118	S4	10	S4	source label retained	Salmo salar	Norway	2018		sigma 1	QWL55114.1		948	MW354898.1_S4

## Sheet: Harmonization Audit
Audit of source L1/L3 labels and canonical ortholog assignments. L1 is lambda 3 polymerase; L3 is lambda 1 core shell.
Isolate	Accession	Source Segment Label	Segment Label	Segment Harmonization Basis	Product	Cds Length
0274	MT758752.1	L1	L3	lambda1/core-shell ortholog; canonical PRV L3	lambda1	3849
0274	MT758753.1	L2	L2	source label retained	lambda2	3873
0274	MT758754.1	L3	L1	lambda3/RdRp ortholog; canonical PRV L1	lambda3	3861
0274	MT758755.1	M1	M1	source label retained	mu2	2283
0274	MT758756.1	M2	M2	source label retained	mu1	2070
0274	MT758757.1	M3	M3	source label retained	muNS	2298
0274	MT758758.1	S1	S1	source label retained	sigma3	993
0274	MT758759.1	S2	S2	source label retained	sigma2	1263
0274	MT758760.1	S3	S3	source label retained	sigmaNS	1065
0274	MT758761.1	S4	S4	source label retained	sigma1	948
0277	MT758822.1	L1	L3	lambda1/core-shell ortholog; canonical PRV L3	lambda1	3849
0277	MT758823.1	L2	L2	source label retained	lambda2	3873
0277	MT758824.1	L3	L1	lambda3/RdRp ortholog; canonical PRV L1	lambda3	3861
0277	MT758825.1	M1	M1	source label retained	mu2	2283
0277	MT758826.1	M2	M2	source label retained	mu1	2070
0277	MT758827.1	M3	M3	source label retained	muNS	2298
0277	MT758828.1	S1	S1	source label retained	sigma3	993
0277	MT758829.1	S2	S2	source label retained	sigma2	1263
0277	MT758830.1	S3	S3	source label retained	sigmaNS	1065
0277	MT758831.1	S4	S4	source label retained	sigma1	948
0314	MT758732.1	L1	L3	lambda1/core-shell ortholog; canonical PRV L3	lambda1	3849
0314	MT758733.1	L2	L2	source label retained	lambda2	3873
0314	MT758734.1	L3	L1	lambda3/RdRp ortholog; canonical PRV L1	lambda3	3861
0314	MT758735.1	M1	M1	source label retained	mu2	2283
0314	MT758736.1	M2	M2	source label retained	mu1	2070
0314	MT758737.1	M3	M3	source label retained	muNS	2298
0314	MT758738.1	S1	S1	source label retained	sigma3	993
0314	MT758739.1	S2	S2	source label retained	sigma2	1263
0314	MT758740.1	S3	S3	source label retained	sigmaNS	1065
0314	MT758741.1	S4	S4	source label retained	sigma1	948
0456	MT758982.1	L1	L3	lambda1/core-shell ortholog; canonical PRV L3	lambda1	3849
0456	MT758983.1	L2	L2	source label retained	lambda2	3873
0456	MT758984.1	L3	L1	lambda3/RdRp ortholog; canonical PRV L1	lambda3	3861
0456	MT758985.1	M1	M1	source label retained	mu2	2283
0456	MT758986.1	M2	M2	source label retained	mu1	2070
0456	MT758987.1	M3	M3	source label retained	muNS	2298
0456	MT758988.1	S1	S1	source label retained	sigma3	993
0456	MT758989.1	S2	S2	source label retained	sigma2	1263
0456	MT758990.1	S3	S3	source label retained	sigmaNS	1065
0456	MT758991.1	S4	S4	source label retained	sigma1	948
050607	KR337473.1	L1	L1	lambda3/RdRp ortholog; canonical PRV L1	lambda 3 protein	3861
050607	KR337474.1	L2	L2	source label retained	lambda 2 protein	3873
050607	KR337475.1	L3	L3	lambda1/core-shell ortholog; canonical PRV L3	lambda 1 protein	3849
050607	KR337476.1	M1	M1	source label retained	mu 2 protein	2283
050607	KR337477.1	M2	M2	source label retained	mu 1 protein	2064
050607	KR337478.1	M3	M3	source label retained	mu NS protein	2259
050607	KR337479.1	S1	S1	source label retained	sigma 3 protein	993
050607	KR337480.1	S2	S2	source label retained	sigma 2 protein	1263
050607	KR337481.1	S3	S3	source label retained	sigma NS protein	1065
050607	KR337482.1	S4	S4	source label retained	sigma 1 protein	948
2328	MT758742.1	L1	L3	lambda1/core-shell ortholog; canonical PRV L3	lambda1	3849
2328	MT758743.1	L2	L2	source label retained	lambda2	3873
2328	MT758744.1	L3	L1	lambda3/RdRp ortholog; canonical PRV L1	lambda3	3861
2328	MT758745.1	M1	M1	source label retained	mu2	2283
2328	MT758746.1	M2	M2	source label retained	mu1	2070
2328	MT758747.1	M3	M3	source label retained	muNS	2298
2328	MT758748.1	S1	S1	source label retained	sigma3	993
2328	MT758749.1	S2	S2	source label retained	sigma2	1263
2328	MT758750.1	S3	S3	source label retained	sigmaNS	1065
2328	MT758751.1	S4	S4	source label retained	sigma1	948
2396	MT758902.1	L1	L3	lambda1/core-shell ortholog; canonical PRV L3	lambda1	3849
2396	MT758903.1	L2	L2	source label retained	lambda2	3873
2396	MT758904.1	L3	L1	lambda3/RdRp ortholog; canonical PRV L1	lambda3	3861
2396	MT758905.1	M1	M1	source label retained	mu2	2283
2396	MT758906.1	M2	M2	source label retained	mu1	2070
2396	MT758907.1	M3	M3	source label retained	muNS	2298
2396	MT758908.1	S1	S1	source label retained	sigma3	993
2396	MT758909.1	S2	S2	source label retained	sigma2	1263
2396	MT758910.1	S3	S3	source label retained	sigmaNS	1065
2396	MT758911.1	S4	S4	source label retained	sigma1	948
2419	MT758912.1	L1	L3	lambda1/core-shell ortholog; canonical PRV L3	lambda1	3849
2419	MT758913.1	L2	L2	source label retained	lambda2	3873
2419	MT758914.1	L3	L1	lambda3/RdRp ortholog; canonical PRV L1	lambda3	3861
2419	MT758915.1	M1	M1	source label retained	mu2	2283
2419	MT758916.1	M2	M2	source label retained	mu1	2070
2419	MT758917.1	M3	M3	source label retained	muNS	2298
2419	MT758918.1	S1	S1	source label retained	sigma3	993
2419	MT758919.1	S2	S2	source label retained	sigma2	1263
2419	MT758920.1	S3	S3	source label retained	sigmaNS	1065
2419	MT758921.1	S4	S4	source label retained	sigma1	948
2420	MT758922.1	L1	L3	lambda1/core-shell ortholog; canonical PRV L3	lambda1	3849
2420	MT758923.1	L2	L2	source label retained	lambda2	3873
2420	MT758924.1	L3	L1	lambda3/RdRp ortholog; canonical PRV L1	lambda3	3861
2420	MT758925.1	M1	M1	source label retained	mu2	2283
2420	MT758926.1	M2	M2	source label retained	mu1	2070
2420	MT758927.1	M3	M3	source label retained	muNS	2298
2420	MT758928.1	S1	S1	source label retained	sigma3	993
2420	MT758929.1	S2	S2	source label retained	sigma2	1263
2420	MT758930.1	S3	S3	source label retained	sigmaNS	1065
2420	MT758931.1	S4	S4	source label retained	sigma1	948
2431	MT758962.1	L1	L3	lambda1/core-shell ortholog; canonical PRV L3	lambda1	3849
2431	MT758963.1	L2	L2	source label retained	lambda2	3873
2431	MT758964.1	L3	L1	lambda3/RdRp ortholog; canonical PRV L1	lambda3	3861
2431	MT758965.1	M1	M1	source label retained	mu2	2283
2431	MT758966.1	M2	M2	source label retained	mu1	2070
2431	MT758967.1	M3	M3	source label retained	muNS	2298
2431	MT758968.1	S1	S1	source label retained	sigma3	993
2431	MT758969.1	S2	S2	source label retained	sigma2	1263
2431	MT758970.1	S3	S3	source label retained	sigmaNS	1065
2431	MT758971.1	S4	S4	source label retained	sigma1	948
2444	MT758932.1	L1	L3	lambda1/core-shell ortholog; canonical PRV L3	lambda1	3849
2444	MT758933.1	L2	L2	source label retained	lambda2	3873
2444	MT758934.1	L3	L1	lambda3/RdRp ortholog; canonical PRV L1	lambda3	3861
2444	MT758935.1	M1	M1	source label retained	mu2	2283
2444	MT758936.1	M2	M2	source label retained	mu1	2070
2444	MT758937.1	M3	M3	source label retained	muNS	2298
2444	MT758938.1	S1	S1	source label retained	sigma3	993
2444	MT758939.1	S2	S2	source label retained	sigma2	1263
2444	MT758940.1	S3	S3	source label retained	sigmaNS	1065
2444	MT758941.1	S4	S4	source label retained	sigma1	948
3572	MT758772.1	L1	L3	lambda1/core-shell ortholog; canonical PRV L3	lambda1	3849
3572	MT758773.1	L2	L2	source label retained	lambda2	3873
3572	MT758774.1	L3	L1	lambda3/RdRp ortholog; canonical PRV L1	lambda3	3861
3572	MT758775.1	M1	M1	source label retained	mu2	2283
3572	MT758776.1	M2	M2	source label retained	mu1	2070
3572	MT758777.1	M3	M3	source label retained	muNS	2298
3572	MT758778.1	S1	S1	source label retained	sigma3	993
3572	MT758779.1	S2	S2	source label retained	sigma2	1263
3572	MT758780.1	S3	S3	source label retained	sigmaNS	1065
3572	MT758781.1	S4	S4	source label retained	sigma1	948
4255	MT759132.1	L1	L3	lambda1/core-shell ortholog; canonical PRV L3	lambda1	3849
4255	MT759133.1	L2	L2	source label retained	lambda2	3873
4255	MT759134.1	L3	L1	lambda3/RdRp ortholog; canonical PRV L1	lambda3	3861
4255	MT759135.1	M1	M1	source label retained	mu2	2283
4255	MT759136.1	M2	M2	source label retained	mu1	2070
4255	MT759137.1	M3	M3	source label retained	muNS	2298
4255	MT759138.1	S1	S1	source label retained	sigma3	993
4255	MT759139.1	S2	S2	source label retained	sigma2	1263
4255	MT759140.1	S3	S3	source label retained	sigmaNS	1065
4255	MT759141.1	S4	S4	source label retained	sigma1	948
4256	MT759142.1	L1	L3	lambda1/core-shell ortholog; canonical PRV L3	lambda1	3849
4256	MT759143.1	L2	L2	source label retained	lambda2	3873
4256	MT759144.1	L3	L1	lambda3/RdRp ortholog; canonical PRV L1	lambda3	3861
4256	MT759145.1	M1	M1	source label retained	mu2	2283
4256	MT759146.1	M2	M2	source label retained	mu1	2070
4256	MT759147.1	M3	M3	source label retained	muNS	2298
4256	MT759148.1	S1	S1	source label retained	sigma3	993
4256	MT759149.1	S2	S2	source label retained	sigma2	1263
4256	MT759150.1	S3	S3	source label retained	sigmaNS	1065
4256	MT759151.1	S4	S4	source label retained	sigma1	948
4299	MT759152.1	L1	L3	lambda1/core-shell ortholog; canonical PRV L3	lambda1	3849
4299	MT759153.1	L2	L2	source label retained	lambda2	3873
4299	MT759154.1	L3	L1	lambda3/RdRp ortholog; canonical PRV L1	lambda3	3861
4299	MT759155.1	M1	M1	source label retained	mu2	2283
4299	MT759156.1	M2	M2	source label retained	mu1	2070
4299	MT759157.1	M3	M3	source label retained	muNS	2298
4299	MT759158.1	S1	S1	source label retained	sigma3	993
4299	MT759159.1	S2	S2	source label retained	sigma2	1263
4299	MT759160.1	S3	S3	source label retained	sigmaNS	1065
4299	MT759161.1	S4	S4	source label retained	sigma1	948
4302	MT759162.1	L1	L3	lambda1/core-shell ortholog; canonical PRV L3	lambda1	3849
4302	MT759163.1	L2	L2	source label retained	lambda2	3873
4302	MT759164.1	L3	L1	lambda3/RdRp ortholog; canonical PRV L1	lambda3	3861
4302	MT759165.1	M1	M1	source label retained	mu2	2283
4302	MT759166.1	M2	M2	source label retained	mu1	2070
4302	MT759167.1	M3	M3	source label retained	muNS	2298
4302	MT759168.1	S1	S1	source label retained	sigma3	993
4302	MT759169.1	S2	S2	source label retained	sigma2	1263
4302	MT759170.1	S3	S3	source label retained	sigmaNS	1065
4302	MT759171.1	S4	S4	source label retained	sigma1	948
4335	MT759172.1	L1	L3	lambda1/core-shell ortholog; canonical PRV L3	lambda1	3849
4335	MT759173.1	L2	L2	source label retained	lambda2	3873
4335	MT759174.1	L3	L1	lambda3/RdRp ortholog; canonical PRV L1	lambda3	3861
4335	MT759175.1	M1	M1	source label retained	mu2	2283
4335	MT759176.1	M2	M2	source label retained	mu1	2070
4335	MT759177.1	M3	M3	source label retained	muNS	2298
4335	MT759178.1	S1	S1	source label retained	sigma3	993
4335	MT759179.1	S2	S2	source label retained	sigma2	1263
4335	MT759180.1	S3	S3	source label retained	sigmaNS	1065
4335	MT759181.1	S4	S4	source label retained	sigma1	948
5740	MT758762.1	L1	L3	lambda1/core-shell ortholog; canonical PRV L3	lambda1	3849
5740	MT758763.1	L2	L2	source label retained	lambda2	3873
5740	MT758764.1	L3	L1	lambda3/RdRp ortholog; canonical PRV L1	lambda3	3861
5740	MT758765.1	M1	M1	source label retained	mu2	2283
5740	MT758766.1	M2	M2	source label retained	mu1	2070
5740	MT758767.1	M3	M3	source label retained	muNS	2298
5740	MT758768.1	S1	S1	source label retained	sigma3	993
5740	MT758769.1	S2	S2	source label retained	sigma2	1263
5740	MT758770.1	S3	S3	source label retained	sigmaNS	1065
5740	MT758771.1	S4	S4	source label retained	sigma1	948
5801	MT758722.1	L1	L3	lambda1/core-shell ortholog; canonical PRV L3	lambda1	3849
5801	MT758723.1	L2	L2	source label retained	lambda2	3873
5801	MT758724.1	L3	L1	lambda3/RdRp ortholog; canonical PRV L1	lambda3	3861
5801	MT758725.1	M1	M1	source label retained	mu2	2283
5801	MT758726.1	M2	M2	source label retained	mu1	2070
5801	MT758727.1	M3	M3	source label retained	muNS	2298
5801	MT758728.1	S1	S1	source label retained	sigma3	993
5801	MT758729.1	S2	S2	source label retained	sigma2	1263
5801	MT758730.1	S3	S3	source label retained	sigmaNS	1065
5801	MT758731.1	S4	S4	source label retained	sigma1	948
5814	MT758972.1	L1	L3	lambda1/core-shell ortholog; canonical PRV L3	lambda1	3849
5814	MT758973.1	L2	L2	source label retained	lambda2	3873
5814	MT758974.1	L3	L1	lambda3/RdRp ortholog; canonical PRV L1	lambda3	3861
5814	MT758975.1	M1	M1	source label retained	mu2	2283
5814	MT758976.1	M2	M2	source label retained	mu1	2070
5814	MT758977.1	M3	M3	source label retained	muNS	2298
5814	MT758978.1	S1	S1	source label retained	sigma3	993
5814	MT758979.1	S2	S2	source label retained	sigma2	1263
5814	MT758980.1	S3	S3	source label retained	sigmaNS	1065
5814	MT758981.1	S4	S4	source label retained	sigma1	948
7114	MT758842.1	L1	L3	lambda1/core-shell ortholog; canonical PRV L3	lambda1	3849
7114	MT758843.1	L2	L2	source label retained	lambda2	3873
7114	MT758844.1	L3	L1	lambda3/RdRp ortholog; canonical PRV L1	lambda3	3861
7114	MT758845.1	M1	M1	source label retained	mu2	2283
7114	MT758846.1	M2	M2	source label retained	mu1	2070
7114	MT758847.1	M3	M3	source label retained	muNS	2298
7114	MT758848.1	S1	S1	source label retained	sigma3	993
7114	MT758849.1	S2	S2	source label retained	sigma2	1263
7114	MT758850.1	S3	S3	source label retained	sigmaNS	1065
7114	MT758851.1	S4	S4	source label retained	sigma1	948
7117	MT758862.1	L1	L3	lambda1/core-shell ortholog; canonical PRV L3	lambda1	3849
7117	MT758863.1	L2	L2	source label retained	lambda2	3873
7117	MT758864.1	L3	L1	lambda3/RdRp ortholog; canonical PRV L1	lambda3	3861
7117	MT758865.1	M1	M1	source label retained	mu2	2283
7117	MT758866.1	M2	M2	source label retained	mu1	2070
7117	MT758867.1	M3	M3	source label retained	muNS	2298
7117	MT758868.1	S1	S1	source label retained	sigma3	993
7117	MT758869.1	S2	S2	source label retained	sigma2	1263
7117	MT758870.1	S3	S3	source label retained	sigmaNS	1065
7117	MT758871.1	S4	S4	source label retained	sigma1	948
7230	MT758832.1	L1	L3	lambda1/core-shell ortholog; canonical PRV L3	lambda1	3849
7230	MT758833.1	L2	L2	source label retained	lambda2	3873
7230	MT758834.1	L3	L1	lambda3/RdRp ortholog; canonical PRV L1	lambda3	3861
7230	MT758835.1	M1	M1	source label retained	mu2	2283
7230	MT758836.1	M2	M2	source label retained	mu1	2070
7230	MT758837.1	M3	M3	source label retained	muNS	2298
7230	MT758838.1	S1	S1	source label retained	sigma3	993
7230	MT758839.1	S2	S2	source label retained	sigma2	1263
7230	MT758840.1	S3	S3	source label retained	sigmaNS	1065
7230	MT758841.1	S4	S4	source label retained	sigma1	948
7740	MT759022.1	L1	L3	lambda1/core-shell ortholog; canonical PRV L3	lambda1	3849
7740	MT759023.1	L2	L2	source label retained	lambda2	3873
7740	MT759024.1	L3	L1	lambda3/RdRp ortholog; canonical PRV L1	lambda3	3861
7740	MT759025.1	M1	M1	source label retained	mu2	2283
7740	MT759026.1	M2	M2	source label retained	mu1	2070
7740	MT759027.1	M3	M3	source label retained	muNS	2298
7740	MT759028.1	S1	S1	source label retained	sigma3	993
7740	MT759029.1	S2	S2	source label retained	sigma2	1263
7740	MT759030.1	S3	S3	source label retained	sigmaNS	1065
7740	MT759031.1	S4	S4	source label retained	sigma1	948
7805	MT759032.1	L1	L3	lambda1/core-shell ortholog; canonical PRV L3	lambda1	3849
7805	MT759033.1	L2	L2	source label retained	lambda2	3873
7805	MT759034.1	L3	L1	lambda3/RdRp ortholog; canonical PRV L1	lambda3	3861
7805	MT759035.1	M1	M1	source label retained	mu2	2283
7805	MT759036.1	M2	M2	source label retained	mu1	2070
7805	MT759037.1	M3	M3	source label retained	muNS	2298
7805	MT759038.1	S1	S1	source label retained	sigma3	993
7805	MT759039.1	S2	S2	source label retained	sigma2	1263
7805	MT759040.1	S3	S3	source label retained	sigmaNS	1065
7805	MT759041.1	S4	S4	source label retained	sigma1	948
7825	MT759042.1	L1	L3	lambda1/core-shell ortholog; canonical PRV L3	lambda1	3849
7825	MT759043.1	L2	L2	source label retained	lambda2	3873
7825	MT759044.1	L3	L1	lambda3/RdRp ortholog; canonical PRV L1	lambda3	3861
7825	MT759045.1	M1	M1	source label retained	mu2	2283
7825	MT759046.1	M2	M2	source label retained	mu1	2070
7825	MT759047.1	M3	M3	source label retained	muNS	2298
7825	MT759048.1	S1	S1	source label retained	sigma3	993
7825	MT759049.1	S2	S2	source label retained	sigma2	1263
7825	MT759050.1	S3	S3	source label retained	sigmaNS	1065
7825	MT759051.1	S4	S4	source label retained	sigma1	948
7926	MT758872.1	L1	L3	lambda1/core-shell ortholog; canonical PRV L3	lambda1	3849
7926	MT758873.1	L2	L2	source label retained	lambda2	3873
7926	MT758874.1	L3	L1	lambda3/RdRp ortholog; canonical PRV L1	lambda3	3861
7926	MT758875.1	M1	M1	source label retained	mu2	2283
7926	MT758876.1	M2	M2	source label retained	mu1	2070
7926	MT758877.1	M3	M3	source label retained	muNS	2298
7926	MT758878.1	S1	S1	source label retained	sigma3	993
7926	MT758879.1	S2	S2	source label retained	sigma2	1263
7926	MT758880.1	S3	S3	source label retained	sigmaNS	1065
7926	MT758881.1	S4	S4	source label retained	sigma1	948
8820	MT758812.1	L1	L3	lambda1/core-shell ortholog; canonical PRV L3	lambda1	3849
8820	MT758813.1	L2	L2	source label retained	lambda2	3873
8820	MT758814.1	L3	L1	lambda3/RdRp ortholog; canonical PRV L1	lambda3	3861
8820	MT758815.1	M1	M1	source label retained	mu2	2283
8820	MT758816.1	M2	M2	source label retained	mu1	2070
8820	MT758817.1	M3	M3	source label retained	muNS	2298
8820	MT758818.1	S1	S1	source label retained	sigma3	993
8820	MT758819.1	S2	S2	source label retained	sigma2	1263
8820	MT758820.1	S3	S3	source label retained	sigmaNS	1065
8820	MT758821.1	S4	S4	source label retained	sigma1	948
9310	MT758702.1	L1	L3	lambda1/core-shell ortholog; canonical PRV L3	lambda1	3849
9310	MT758703.1	L2	L2	source label retained	lambda2	3873
9310	MT758704.1	L3	L1	lambda3/RdRp ortholog; canonical PRV L1	lambda3	3861
9310	MT758705.1	M1	M1	source label retained	mu2	2283
9310	MT758706.1	M2	M2	source label retained	mu1	2070
9310	MT758707.1	M3	M3	source label retained	muNS	2298
9310	MT758708.1	S1	S1	source label retained	sigma3	993
9310	MT758709.1	S2	S2	source label retained	sigma2	1263
9310	MT758710.1	S3	S3	source label retained	sigmaNS	1065
9310	MT758711.1	S4	S4	source label retained	sigma1	948
B0404	MT758992.1	L1	L3	lambda1/core-shell ortholog; canonical PRV L3	lambda1	3849
B0404	MT758993.1	L2	L2	source label retained	lambda2	3873
B0404	MT758994.1	L3	L1	lambda3/RdRp ortholog; canonical PRV L1	lambda3	3861
B0404	MT758995.1	M1	M1	source label retained	mu2	2283
B0404	MT758996.1	M2	M2	source label retained	mu1	2070
B0404	MT758997.1	M3	M3	source label retained	muNS	2298
B0404	MT758998.1	S1	S1	source label retained	sigma3	993
B0404	MT758999.1	S2	S2	source label retained	sigma2	1263
B0404	MT759000.1	S3	S3	source label retained	sigmaNS	1065
B0404	MT759001.1	S4	S4	source label retained	sigma1	948
B2176	MT758892.1	L1	L3	lambda1/core-shell ortholog; canonical PRV L3	lambda1	3849
B2176	MT758893.1	L2	L2	source label retained	lambda2	3873
B2176	MT758894.1	L3	L1	lambda3/RdRp ortholog; canonical PRV L1	lambda3	3861
B2176	MT758895.1	M1	M1	source label retained	mu2	2283
B2176	MT758896.1	M2	M2	source label retained	mu1	2070
B2176	MT758897.1	M3	M3	source label retained	muNS	2298
B2176	MT758898.1	S1	S1	source label retained	sigma3	993
B2176	MT758899.1	S2	S2	source label retained	sigma2	1263
B2176	MT758900.1	S3	S3	source label retained	sigmaNS	1065
B2176	MT758901.1	S4	S4	source label retained	sigma1	948
B5392	MT759192.1	L1	L3	lambda1/core-shell ortholog; canonical PRV L3	lambda1	3849
B5392	MT759193.1	L2	L2	source label retained	lambda2	3873
B5392	MT759194.1	L3	L1	lambda3/RdRp ortholog; canonical PRV L1	lambda3	3861
B5392	MT759195.1	M1	M1	source label retained	mu2	2283
B5392	MT759196.1	M2	M2	source label retained	mu1	2070
B5392	MT759197.1	M3	M3	source label retained	muNS	2298
B5392	MT759198.1	S1	S1	source label retained	sigma3	993
B5392	MT759199.1	S2	S2	source label retained	sigma2	1263
B5392	MT759200.1	S3	S3	source label retained	sigmaNS	1065
B5392	MT759201.1	S4	S4	source label retained	sigma1	948
B5591	MT759062.1	L1	L3	lambda1/core-shell ortholog; canonical PRV L3	lambda1	3849
B5591	MT759063.1	L2	L2	source label retained	lambda2	3873
B5591	MT759064.1	L3	L1	lambda3/RdRp ortholog; canonical PRV L1	lambda3	3861
B5591	MT759065.1	M1	M1	source label retained	mu2	2283
B5591	MT759066.1	M2	M2	source label retained	mu1	2070
B5591	MT759067.1	M3	M3	source label retained	muNS	2298
B5591	MT759068.1	S1	S1	source label retained	sigma3	993
B5591	MT759069.1	S2	S2	source label retained	sigma2	1263
B5591	MT759070.1	S3	S3	source label retained	sigmaNS	1065
B5591	MT759071.1	S4	S4	source label retained	sigma1	948
B5593	MT759072.1	L1	L3	lambda1/core-shell ortholog; canonical PRV L3	lambda1	3849
B5593	MT759073.1	L2	L2	source label retained	lambda2	3873
B5593	MT759074.1	L3	L1	lambda3/RdRp ortholog; canonical PRV L1	lambda3	3861
B5593	MT759075.1	M1	M1	source label retained	mu2	2283
B5593	MT759076.1	M2	M2	source label retained	mu1	2070
B5593	MT759077.1	M3	M3	source label retained	muNS	2298
B5593	MT759078.1	S1	S1	source label retained	sigma3	993
B5593	MT759079.1	S2	S2	source label retained	sigma2	1263
B5593	MT759080.1	S3	S3	source label retained	sigmaNS	1065
B5593	MT759081.1	S4	S4	source label retained	sigma1	948
B5597	MT759102.1	L1	L3	lambda1/core-shell ortholog; canonical PRV L3	lambda1	3849
B5597	MT759103.1	L2	L2	source label retained	lambda2	3873
B5597	MT759104.1	L3	L1	lambda3/RdRp ortholog; canonical PRV L1	lambda3	3861
B5597	MT759105.1	M1	M1	source label retained	mu2	2283
B5597	MT759106.1	M2	M2	source label retained	mu1	2070
B5597	MT759107.1	M3	M3	source label retained	muNS	2298
B5597	MT759108.1	S1	S1	source label retained	sigma3	993
B5597	MT759109.1	S2	S2	source label retained	sigma2	1263
B5597	MT759110.1	S3	S3	source label retained	sigmaNS	1065
B5597	MT759111.1	S4	S4	source label retained	sigma1	948
B7146	MT759002.1	L1	L3	lambda1/core-shell ortholog; canonical PRV L3	lambda1	3849
B7146	MT759003.1	L2	L2	source label retained	lambda2	3873
B7146	MT759004.1	L3	L1	lambda3/RdRp ortholog; canonical PRV L1	lambda3	3861
B7146	MT759005.1	M1	M1	source label retained	mu2	2283
B7146	MT759006.1	M2	M2	source label retained	mu1	2070
B7146	MT759007.1	M3	M3	source label retained	muNS	2298
B7146	MT759008.1	S1	S1	source label retained	sigma3	993
B7146	MT759009.1	S2	S2	source label retained	sigma2	1263
B7146	MT759010.1	S3	S3	source label retained	sigmaNS	1065
B7146	MT759011.1	S4	S4	source label retained	sigma1	948
B7283	MT759402.1	L1	L3	lambda1/core-shell ortholog; canonical PRV L3	lambda1	3849
B7283	MT759403.1	L2	L2	source label retained	lambda2	3873
B7283	MT759404.1	L3	L1	lambda3/RdRp ortholog; canonical PRV L1	lambda3	3861
B7283	MT759405.1	M1	M1	source label retained	mu2	2283
B7283	MT759406.1	M2	M2	source label retained	mu1	2070
B7283	MT759407.1	M3	M3	source label retained	muNS	2298
B7283	MT759408.1	S1	S1	source label retained	sigma3	993
B7283	MT759409.1	S2	S2	source label retained	sigma2	1263
B7283	MT759410.1	S3	S3	source label retained	sigmaNS	1065
B7283	MT759411.1	S4	S4	source label retained	sigma1	948
B7286	MT759392.1	L1	L3	lambda1/core-shell ortholog; canonical PRV L3	lambda1	3849
B7286	MT759393.1	L2	L2	source label retained	lambda2	3873
B7286	MT759394.1	L3	L1	lambda3/RdRp ortholog; canonical PRV L1	lambda3	3861
B7286	MT759395.1	M1	M1	source label retained	mu2	2283
B7286	MT759396.1	M2	M2	source label retained	mu1	2070
B7286	MT759397.1	M3	M3	source label retained	muNS	2298
B7286	MT759398.1	S1	S1	source label retained	sigma3	993
B7286	MT759399.1	S2	S2	source label retained	sigma2	1263
B7286	MT759400.1	S3	S3	source label retained	sigmaNS	1065
B7286	MT759401.1	S4	S4	source label retained	sigma1	948
B7293	MT759242.1	L1	L3	lambda1/core-shell ortholog; canonical PRV L3	lambda1	3849
B7293	MT759243.1	L2	L2	source label retained	lambda2	3873
B7293	MT759244.1	L3	L1	lambda3/RdRp ortholog; canonical PRV L1	lambda3	3861
B7293	MT759245.1	M1	M1	source label retained	mu2	2283
B7293	MT759246.1	M2	M2	source label retained	mu1	2070
B7293	MT759247.1	M3	M3	source label retained	muNS	2298
B7293	MT759248.1	S1	S1	source label retained	sigma3	993
B7293	MT759249.1	S2	S2	source label retained	sigma2	1263
B7293	MT759250.1	S3	S3	source label retained	sigmaNS	1065
B7293	MT759251.1	S4	S4	source label retained	sigma1	948
B7437	MT759112.1	L1	L3	lambda1/core-shell ortholog; canonical PRV L3	lambda1	3849
B7437	MT759113.1	L2	L2	source label retained	lambda2	3873
B7437	MT759114.1	L3	L1	lambda3/RdRp ortholog; canonical PRV L1	lambda3	3861
B7437	MT759115.1	M1	M1	source label retained	mu2	2283
B7437	MT759116.1	M2	M2	source label retained	mu1	2070
B7437	MT759117.1	M3	M3	source label retained	muNS	2298
B7437	MT759118.1	S1	S1	source label retained	sigma3	993
B7437	MT759119.1	S2	S2	source label retained	sigma2	1263
B7437	MT759120.1	S3	S3	source label retained	sigmaNS	1065
B7437	MT759121.1	S4	S4	source label retained	sigma1	948
B7453	MT759252.1	L1	L3	lambda1/core-shell ortholog; canonical PRV L3	lambda1	3849
B7453	MT759253.1	L2	L2	source label retained	lambda2	3873
B7453	MT759254.1	L3	L1	lambda3/RdRp ortholog; canonical PRV L1	lambda3	3861
B7453	MT759255.1	M1	M1	source label retained	mu2	2283
B7453	MT759256.1	M2	M2	source label retained	mu1	2070
B7453	MT759257.1	M3	M3	source label retained	muNS	2298
B7453	MT759258.1	S1	S1	source label retained	sigma3	993
B7453	MT759259.1	S2	S2	source label retained	sigma2	1263
B7453	MT759260.1	S3	S3	source label retained	sigmaNS	1065
B7453	MT759261.1	S4	S4	source label retained	sigma1	948
B7474	MT759082.1	L1	L3	lambda1/core-shell ortholog; canonical PRV L3	lambda1	3849
B7474	MT759083.1	L2	L2	source label retained	lambda2	3873
B7474	MT759084.1	L3	L1	lambda3/RdRp ortholog; canonical PRV L1	lambda3	3861
B7474	MT759085.1	M1	M1	source label retained	mu2	2283
B7474	MT759086.1	M2	M2	source label retained	mu1	2070
B7474	MT759087.1	M3	M3	source label retained	muNS	2298
B7474	MT759088.1	S1	S1	source label retained	sigma3	993
B7474	MT759089.1	S2	S2	source label retained	sigma2	1263
B7474	MT759090.1	S3	S3	source label retained	sigmaNS	1065
B7474	MT759091.1	S4	S4	source label retained	sigma1	948
B7483	MT759092.1	L1	L3	lambda1/core-shell ortholog; canonical PRV L3	lambda1	3849
B7483	MT759093.1	L2	L2	source label retained	lambda2	3873
B7483	MT759094.1	L3	L1	lambda3/RdRp ortholog; canonical PRV L1	lambda3	3861
B7483	MT759095.1	M1	M1	source label retained	mu2	2283
B7483	MT759096.1	M2	M2	source label retained	mu1	2070
B7483	MT759097.1	M3	M3	source label retained	muNS	2298
B7483	MT759098.1	S1	S1	source label retained	sigma3	993
B7483	MT759099.1	S2	S2	source label retained	sigma2	1263
B7483	MT759100.1	S3	S3	source label retained	sigmaNS	1065
B7483	MT759101.1	S4	S4	source label retained	sigma1	948
B7669	MT759262.1	L1	L3	lambda1/core-shell ortholog; canonical PRV L3	lambda1	3849
B7669	MT759263.1	L2	L2	source label retained	lambda2	3873
B7669	MT759264.1	L3	L1	lambda3/RdRp ortholog; canonical PRV L1	lambda3	3861
B7669	MT759265.1	M1	M1	source label retained	mu2	2283
B7669	MT759266.1	M2	M2	source label retained	mu1	2070
B7669	MT759267.1	M3	M3	source label retained	muNS	2298
B7669	MT759268.1	S1	S1	source label retained	sigma3	993
B7669	MT759269.1	S2	S2	source label retained	sigma2	1263
B7669	MT759270.1	S3	S3	source label retained	sigmaNS	1065
B7669	MT759271.1	S4	S4	source label retained	sigma1	948
B7803	MT759322.1	L1	L3	lambda1/core-shell ortholog; canonical PRV L3	lambda1	3849
B7803	MT759323.1	L2	L2	source label retained	lambda2	3873
B7803	MT759324.1	L3	L1	lambda3/RdRp ortholog; canonical PRV L1	lambda3	3861
B7803	MT759325.1	M1	M1	source label retained	mu2	2283
B7803	MT759326.1	M2	M2	source label retained	mu1	2070
B7803	MT759327.1	M3	M3	source label retained	muNS	2298
B7803	MT759328.1	S1	S1	source label retained	sigma3	993
B7803	MT759329.1	S2	S2	source label retained	sigma2	1263
B7803	MT759330.1	S3	S3	source label retained	sigmaNS	1065
B7803	MT759331.1	S4	S4	source label retained	sigma1	948
B7811	MT759412.1	L1	L3	lambda1/core-shell ortholog; canonical PRV L3	lambda1	3849
B7811	MT759413.1	L2	L2	source label retained	lambda2	3873
B7811	MT759414.1	L3	L1	lambda3/RdRp ortholog; canonical PRV L1	lambda3	3861
B7811	MT759415.1	M1	M1	source label retained	mu2	2283
B7811	MT759416.1	M2	M2	source label retained	mu1	2070
B7811	MT759417.1	M3	M3	source label retained	muNS	2298
B7811	MT759418.1	S1	S1	source label retained	sigma3	993
B7811	MT759419.1	S2	S2	source label retained	sigma2	1263
B7811	MT759420.1	S3	S3	source label retained	sigmaNS	1065
B7811	MT759421.1	S4	S4	source label retained	sigma1	948
B7817	MT759422.1	L1	L3	lambda1/core-shell ortholog; canonical PRV L3	lambda1	3849
B7817	MT759423.1	L2	L2	source label retained	lambda2	3873
B7817	MT759424.1	L3	L1	lambda3/RdRp ortholog; canonical PRV L1	lambda3	3861
B7817	MT759425.1	M1	M1	source label retained	mu2	2283
B7817	MT759426.1	M2	M2	source label retained	mu1	2070
B7817	MT759427.1	M3	M3	source label retained	muNS	2298
B7817	MT759428.1	S1	S1	source label retained	sigma3	993
B7817	MT759429.1	S2	S2	source label retained	sigma2	1263
B7817	MT759430.1	S3	S3	source label retained	sigmaNS	1065
B7817	MT759431.1	S4	S4	source label retained	sigma1	948
B7874	MT759272.1	L1	L3	lambda1/core-shell ortholog; canonical PRV L3	lambda1	3849
B7874	MT759273.1	L2	L2	source label retained	lambda2	3873
B7874	MT759274.1	L3	L1	lambda3/RdRp ortholog; canonical PRV L1	lambda3	3861
B7874	MT759275.1	M1	M1	source label retained	mu2	2283
B7874	MT759276.1	M2	M2	source label retained	mu1	2070
B7874	MT759277.1	M3	M3	source label retained	muNS	2298
B7874	MT759278.1	S1	S1	source label retained	sigma3	993
B7874	MT759279.1	S2	S2	source label retained	sigma2	1263
B7874	MT759280.1	S3	S3	source label retained	sigmaNS	1065
B7874	MT759281.1	S4	S4	source label retained	sigma1	948
B7875	MT759282.1	L1	L3	lambda1/core-shell ortholog; canonical PRV L3	lambda1	3849
B7875	MT759283.1	L2	L2	source label retained	lambda2	3873
B7875	MT759284.1	L3	L1	lambda3/RdRp ortholog; canonical PRV L1	lambda3	3861
B7875	MT759285.1	M1	M1	source label retained	mu2	2283
B7875	MT759286.1	M2	M2	source label retained	mu1	2070
B7875	MT759287.1	M3	M3	source label retained	muNS	2298
B7875	MT759288.1	S1	S1	source label retained	sigma3	993
B7875	MT759289.1	S2	S2	source label retained	sigma2	1263
B7875	MT759290.1	S3	S3	source label retained	sigmaNS	1065
B7875	MT759291.1	S4	S4	source label retained	sigma1	948
B7877	MT759292.1	L1	L3	lambda1/core-shell ortholog; canonical PRV L3	lambda1	3849
B7877	MT759293.1	L2	L2	source label retained	lambda2	3873
B7877	MT759294.1	L3	L1	lambda3/RdRp ortholog; canonical PRV L1	lambda3	3861
B7877	MT759295.1	M1	M1	source label retained	mu2	2283
B7877	MT759296.1	M2	M2	source label retained	mu1	2070
B7877	MT759297.1	M3	M3	source label retained	muNS	2298
B7877	MT759298.1	S1	S1	source label retained	sigma3	993
B7877	MT759299.1	S2	S2	source label retained	sigma2	1263
B7877	MT759300.1	S3	S3	source label retained	sigmaNS	1065
B7877	MT759301.1	S4	S4	source label retained	sigma1	948
B7883	MT759302.1	L1	L3	lambda1/core-shell ortholog; canonical PRV L3	lambda1	3849
B7883	MT759303.1	L2	L2	source label retained	lambda2	3873
B7883	MT759304.1	L3	L1	lambda3/RdRp ortholog; canonical PRV L1	lambda3	3861
B7883	MT759305.1	M1	M1	source label retained	mu2	2283
B7883	MT759306.1	M2	M2	source label retained	mu1	2070
B7883	MT759307.1	M3	M3	source label retained	muNS	2298
B7883	MT759308.1	S1	S1	source label retained	sigma3	993
B7883	MT759309.1	S2	S2	source label retained	sigma2	1263
B7883	MT759310.1	S3	S3	source label retained	sigmaNS	1065
B7883	MT759311.1	S4	S4	source label retained	sigma1	948
B7888	MT759312.1	L1	L3	lambda1/core-shell ortholog; canonical PRV L3	lambda1	3849
B7888	MT759313.1	L2	L2	source label retained	lambda2	3873
B7888	MT759314.1	L3	L1	lambda3/RdRp ortholog; canonical PRV L1	lambda3	3861
B7888	MT759315.1	M1	M1	source label retained	mu2	2283
B7888	MT759316.1	M2	M2	source label retained	mu1	2070
B7888	MT759317.1	M3	M3	source label retained	muNS	2298
B7888	MT759318.1	S1	S1	source label retained	sigma3	993
B7888	MT759319.1	S2	S2	source label retained	sigma2	1263
B7888	MT759320.1	S3	S3	source label retained	sigmaNS	1065
B7888	MT759321.1	S4	S4	source label retained	sigma1	948
B7910	MT759182.1	L1	L3	lambda1/core-shell ortholog; canonical PRV L3	lambda1	3849
B7910	MT759183.1	L2	L2	source label retained	lambda2	3873
B7910	MT759184.1	L3	L1	lambda3/RdRp ortholog; canonical PRV L1	lambda3	3861
B7910	MT759185.1	M1	M1	source label retained	mu2	2283
B7910	MT759186.1	M2	M2	source label retained	mu1	2070
B7910	MT759187.1	M3	M3	source label retained	muNS	2298
B7910	MT759188.1	S1	S1	source label retained	sigma3	993
B7910	MT759189.1	S2	S2	source label retained	sigma2	1263
B7910	MT759190.1	S3	S3	source label retained	sigmaNS	1065
B7910	MT759191.1	S4	S4	source label retained	sigma1	948
CGA280-05	NC_036476.1	L1	L3	lambda1/core-shell ortholog; canonical PRV L3	core shell protein	3849
CGA280-05	NC_036468.1	L2	L2	source label retained	core turret protein	3873
CGA280-05	NC_036477.1	L3	L1	lambda3/RdRp ortholog; canonical PRV L1	core RNA-dependent RNA polymerase	3861
CGA280-05	NC_036469.1	M1	M1	source label retained	core NTPase	2283
CGA280-05	NC_036470.1	M2	M2	source label retained	outer shell protein	2064
CGA280-05	NC_036471.1	M3	M3	source label retained	non-structural protein	2259
CGA280-05	NC_036472.1	S1	S1	source label retained	outer clamp protein	993
CGA280-05	NC_036473.1	S2	S2	source label retained	core clamp protein	1263
CGA280-05	NC_036474.1	S3	S3	source label retained	non-structural RNA protein	1065
CGA280-05	NC_036475.1	S4	S4	source label retained	outer fiber protein	948
D5324	MT759432.1	L1	L3	lambda1/core-shell ortholog; canonical PRV L3	lambda1	3849
D5324	MT759433.1	L2	L2	source label retained	lambda2	3873
D5324	MT759434.1	L3	L1	lambda3/RdRp ortholog; canonical PRV L1	lambda3	3861
D5324	MT759435.1	M1	M1	source label retained	mu2	2283
D5324	MT759436.1	M2	M2	source label retained	mu1	2070
D5324	MT759437.1	M3	M3	source label retained	muNS	2298
D5324	MT759438.1	S1	S1	source label retained	sigma3	993
D5324	MT759439.1	S2	S2	source label retained	sigma2	1263
D5324	MT759440.1	S3	S3	source label retained	sigmaNS	1065
D5324	MT759441.1	S4	S4	source label retained	sigma1	948
F0059	MT759352.1	L1	L3	lambda1/core-shell ortholog; canonical PRV L3	lambda1	3849
F0059	MT759353.1	L2	L2	source label retained	lambda2	3873
F0059	MT759354.1	L3	L1	lambda3/RdRp ortholog; canonical PRV L1	lambda3	3861
F0059	MT759355.1	M1	M1	source label retained	mu2	2283
F0059	MT759356.1	M2	M2	source label retained	mu1	2070
F0059	MT759357.1	M3	M3	source label retained	muNS	2298
F0059	MT759358.1	S1	S1	source label retained	sigma3	993
F0059	MT759359.1	S2	S2	source label retained	sigma2	1263
F0059	MT759360.1	S3	S3	source label retained	sigmaNS	1065
F0059	MT759361.1	S4	S4	source label retained	sigma1	948
FO/41/16	MK675882.1	L1	L1	lambda3/RdRp ortholog; canonical PRV L1	lambda 3	3861
FO/41/16	MK675883.1	L2	L2	source label retained	lambda 2	3873
FO/41/16	MK675884.1	L3	L3	lambda1/core-shell ortholog; canonical PRV L3	lambda 1	3849
FO/41/16	MK675885.1	M1	M1	source label retained	mu2	2283
FO/41/16	MK675886.1	M2	M2	source label retained	mu1	2064
FO/41/16	MK675887.1	M3	M3	source label retained	muNS	2259
FO/41/16	MK675888.1	S1	S1	source label retained	sigma 3	993
FO/41/16	MK675889.1	S2	S2	source label retained	sigma 2	1263
FO/41/16	MK675890.1	S3	S3	source label retained	sigma NS	1065
FO/41/16	MK675891.1	S4	S4	source label retained	sigma 1	948
G33	MT759452.1	L1	L3	lambda1/core-shell ortholog; canonical PRV L3	lambda1	3849
G33	MT759453.1	L2	L2	source label retained	lambda2	3873
G33	MT759454.1	L3	L1	lambda3/RdRp ortholog; canonical PRV L1	lambda3	3861
G33	MT759455.1	M1	M1	source label retained	mu2	2283
G33	MT759456.1	M2	M2	source label retained	mu1	2070
G33	MT759457.1	M3	M3	source label retained	muNS	2298
G33	MT759458.1	S1	S1	source label retained	sigma3	993
G33	MT759459.1	S2	S2	source label retained	sigma2	1263
G33	MT759460.1	S3	S3	source label retained	sigmaNS	1065
G33	MT759461.1	S4	S4	source label retained	sigma1	948
G347	MT759542.1	L1	L3	lambda1/core-shell ortholog; canonical PRV L3	lambda1	3849
G347	MT759543.1	L2	L2	source label retained	lambda2	3873
G347	MT759544.1	L3	L1	lambda3/RdRp ortholog; canonical PRV L1	lambda3	3861
G347	MT759545.1	M1	M1	source label retained	mu2	2283
G347	MT759546.1	M2	M2	source label retained	mu1	2070
G347	MT759547.1	M3	M3	source label retained	muNS	2298
G347	MT759548.1	S1	S1	source label retained	sigma3	993
G347	MT759549.1	S2	S2	source label retained	sigma2	1263
G347	MT759550.1	S3	S3	source label retained	sigmaNS	1065
G347	MT759551.1	S4	S4	source label retained	sigma1	948
G364	MT778887.1	L1	L3	lambda1/core-shell ortholog; canonical PRV L3	lambda1	3849
G364	MT778888.1	L2	L2	source label retained	lambda2	3873
G364	MT778889.1	L3	L1	lambda3/RdRp ortholog; canonical PRV L1	lambda3	3861
G364	MT778890.1	M1	M1	source label retained	mu2	2283
G364	MT778891.1	M2	M2	source label retained	mu1	2070
G364	MT778892.1	M3	M3	source label retained	muNS	2298
G364	MT778893.1	S1	S1	source label retained	sigma3	993
G364	MT778894.1	S2	S2	source label retained	sigma2	1263
G364	MT778895.1	S3	S3	source label retained	sigmaNS	1065
G364	MT778896.1	S4	S4	source label retained	sigma1	948
G44	MT759522.1	L1	L3	lambda1/core-shell ortholog; canonical PRV L3	lambda1	3849
G44	MT759523.1	L2	L2	source label retained	lambda2	3873
G44	MT759524.1	L3	L1	lambda3/RdRp ortholog; canonical PRV L1	lambda3	3861
G44	MT759525.1	M1	M1	source label retained	mu2	2283
G44	MT759526.1	M2	M2	source label retained	mu1	2070
G44	MT759527.1	M3	M3	source label retained	muNS	2298
G44	MT759528.1	S1	S1	source label retained	sigma3	993
G44	MT759529.1	S2	S2	source label retained	sigma2	1263
G44	MT759530.1	S3	S3	source label retained	sigmaNS	1065
G44	MT759531.1	S4	S4	source label retained	sigma1	948
G459	MT778897.1	L1	L3	lambda1/core-shell ortholog; canonical PRV L3	lambda1	3849
G459	MT778898.1	L2	L2	source label retained	lambda2	3873
G459	MT778899.1	L3	L1	lambda3/RdRp ortholog; canonical PRV L1	lambda3	3861
G459	MT778900.1	M1	M1	source label retained	mu2	2283
G459	MT778901.1	M2	M2	source label retained	mu1	2070
G459	MT778902.1	M3	M3	source label retained	muNS	2298
G459	MT778903.1	S1	S1	source label retained	sigma3	993
G459	MT778904.1	S2	S2	source label retained	sigma2	1263
G459	MT778905.1	S3	S3	source label retained	sigmaNS	1065
G459	MT778906.1	S4	S4	source label retained	sigma1	948
G463	MT759532.1	L1	L3	lambda1/core-shell ortholog; canonical PRV L3	lambda1	3849
G463	MT759533.1	L2	L2	source label retained	lambda2	3873
G463	MT759534.1	L3	L1	lambda3/RdRp ortholog; canonical PRV L1	lambda3	3861
G463	MT759535.1	M1	M1	source label retained	mu2	2283
G463	MT759536.1	M2	M2	source label retained	mu1	2070
G463	MT759537.1	M3	M3	source label retained	muNS	2298
G463	MT759538.1	S1	S1	source label retained	sigma3	993
G463	MT759539.1	S2	S2	source label retained	sigma2	1263
G463	MT759540.1	S3	S3	source label retained	sigmaNS	1065
G463	MT759541.1	S4	S4	source label retained	sigma1	948
G523	MT759482.1	L1	L3	lambda1/core-shell ortholog; canonical PRV L3	lambda1	3849
G523	MT759483.1	L2	L2	source label retained	lambda2	3873
G523	MT759484.1	L3	L1	lambda3/RdRp ortholog; canonical PRV L1	lambda3	3861
G523	MT759485.1	M1	M1	source label retained	mu2	2283
G523	MT759486.1	M2	M2	source label retained	mu1	2070
G523	MT759487.1	M3	M3	source label retained	muNS	2298
G523	MT759488.1	S1	S1	source label retained	sigma3	993
G523	MT759489.1	S2	S2	source label retained	sigma2	1263
G523	MT759490.1	S3	S3	source label retained	sigmaNS	1065
G523	MT759491.1	S4	S4	source label retained	sigma1	948
G537	MT759122.1	L1	L3	lambda1/core-shell ortholog; canonical PRV L3	lambda1	3849
G537	MT759123.1	L2	L2	source label retained	lambda2	3873
G537	MT759124.1	L3	L1	lambda3/RdRp ortholog; canonical PRV L1	lambda3	3861
G537	MT759125.1	M1	M1	source label retained	mu2	2283
G537	MT759126.1	M2	M2	source label retained	mu1	2070
G537	MT759127.1	M3	M3	source label retained	muNS	2298
G537	MT759128.1	S1	S1	source label retained	sigma3	993
G537	MT759129.1	S2	S2	source label retained	sigma2	1263
G537	MT759130.1	S3	S3	source label retained	sigmaNS	1065
G537	MT759131.1	S4	S4	source label retained	sigma1	948
G563	MT778907.1	L1	L3	lambda1/core-shell ortholog; canonical PRV L3	lambda1	3849
G563	MT778908.1	L2	L2	source label retained	lambda2	3873
G563	MT778909.1	L3	L1	lambda3/RdRp ortholog; canonical PRV L1	lambda3	3861
G563	MT778910.1	M1	M1	source label retained	mu2	2283
G563	MT778911.1	M2	M2	source label retained	mu1	2070
G563	MT778912.1	M3	M3	source label retained	muNS	2298
G563	MT778913.1	S1	S1	source label retained	sigma3	993
G563	MT778914.1	S2	S2	source label retained	sigma2	1263
G563	MT778915.1	S3	S3	source label retained	sigmaNS	1065
G563	MT778916.1	S4	S4	source label retained	sigma1	948
G572	MT778917.1	L1	L3	lambda1/core-shell ortholog; canonical PRV L3	lambda1	3849
G572	MT778918.1	L2	L2	source label retained	lambda2	3873
G572	MT778919.1	L3	L1	lambda3/RdRp ortholog; canonical PRV L1	lambda3	3861
G572	MT778920.1	M1	M1	source label retained	mu2	2283
G572	MT778921.1	M2	M2	source label retained	mu1	2070
G572	MT778922.1	M3	M3	source label retained	muNS	2298
G572	MT778923.1	S1	S1	source label retained	sigma3	993
G572	MT778924.1	S2	S2	source label retained	sigma2	1263
G572	MT778925.1	S3	S3	source label retained	sigmaNS	1065
G572	MT778926.1	S4	S4	source label retained	sigma1	948
G578	MT778927.1	L1	L3	lambda1/core-shell ortholog; canonical PRV L3	lambda1	3849
G578	MT778928.1	L2	L2	source label retained	lambda2	3873
G578	MT778929.1	L3	L1	lambda3/RdRp ortholog; canonical PRV L1	lambda3	3861
G578	MT778930.1	M1	M1	source label retained	mu2	2283
G578	MT778931.1	M2	M2	source label retained	mu1	2070
G578	MT778932.1	M3	M3	source label retained	muNS	2298
G578	MT778933.1	S1	S1	source label retained	sigma3	993
G578	MT778934.1	S2	S2	source label retained	sigma2	1263
G578	MT778935.1	S3	S3	source label retained	sigmaNS	1065
G578	MT778936.1	S4	S4	source label retained	sigma1	948
G606	MT759462.1	L1	L3	lambda1/core-shell ortholog; canonical PRV L3	lambda1	3849
G606	MT759463.1	L2	L2	source label retained	lambda2	3873
G606	MT759464.1	L3	L1	lambda3/RdRp ortholog; canonical PRV L1	lambda3	3861
G606	MT759465.1	M1	M1	source label retained	mu2	2283
G606	MT759466.1	M2	M2	source label retained	mu1	2070
G606	MT759467.1	M3	M3	source label retained	muNS	2298
G606	MT759468.1	S1	S1	source label retained	sigma3	993
G606	MT759469.1	S2	S2	source label retained	sigma2	1263
G606	MT759470.1	S3	S3	source label retained	sigmaNS	1065
G606	MT759471.1	S4	S4	source label retained	sigma1	948
G677	MT759442.1	L1	L3	lambda1/core-shell ortholog; canonical PRV L3	lambda1	3849
G677	MT759443.1	L2	L2	source label retained	lambda2	3873
G677	MT759444.1	L3	L1	lambda3/RdRp ortholog; canonical PRV L1	lambda3	3861
G677	MT759445.1	M1	M1	source label retained	mu2	2283
G677	MT759446.1	M2	M2	source label retained	mu1	2070
G677	MT759447.1	M3	M3	source label retained	muNS	2298
G677	MT759448.1	S1	S1	source label retained	sigma3	993
G677	MT759449.1	S2	S2	source label retained	sigma2	1263
G677	MT759450.1	S3	S3	source label retained	sigmaNS	1065
G677	MT759451.1	S4	S4	source label retained	sigma1	948
G707	MT758882.1	L1	L3	lambda1/core-shell ortholog; canonical PRV L3	lambda1	3849
G707	MT758883.1	L2	L2	source label retained	lambda2	3873
G707	MT758884.1	L3	L1	lambda3/RdRp ortholog; canonical PRV L1	lambda3	3861
G707	MT758885.1	M1	M1	source label retained	mu2	2283
G707	MT758886.1	M2	M2	source label retained	mu1	2070
G707	MT758887.1	M3	M3	source label retained	muNS	2298
G707	MT758888.1	S1	S1	source label retained	sigma3	993
G707	MT758889.1	S2	S2	source label retained	sigma2	1263
G707	MT758890.1	S3	S3	source label retained	sigmaNS	1065
G707	MT758891.1	S4	S4	source label retained	sigma1	948
G712	MT759472.1	L1	L3	lambda1/core-shell ortholog; canonical PRV L3	lambda1	3849
G712	MT759473.1	L2	L2	source label retained	lambda2	3873
G712	MT759474.1	L3	L1	lambda3/RdRp ortholog; canonical PRV L1	lambda3	3861
G712	MT759475.1	M1	M1	source label retained	mu2	2283
G712	MT759476.1	M2	M2	source label retained	mu1	2070
G712	MT759477.1	M3	M3	source label retained	muNS	2298
G712	MT759478.1	S1	S1	source label retained	sigma3	993
G712	MT759479.1	S2	S2	source label retained	sigma2	1263
G712	MT759480.1	S3	S3	source label retained	sigmaNS	1065
G712	MT759481.1	S4	S4	source label retained	sigma1	948
G722	MT778937.1	L1	L3	lambda1/core-shell ortholog; canonical PRV L3	lambda1	3849
G722	MT778938.1	L2	L2	source label retained	lambda2	3873
G722	MT778939.1	L3	L1	lambda3/RdRp ortholog; canonical PRV L1	lambda3	3861
G722	MT778940.1	M1	M1	source label retained	mu2	2283
G722	MT778941.1	M2	M2	source label retained	mu1	2070
G722	MT778942.1	M3	M3	source label retained	muNS	2298
G722	MT778943.1	S1	S1	source label retained	sigma3	993
G722	MT778944.1	S2	S2	source label retained	sigma2	1263
G722	MT778945.1	S3	S3	source label retained	sigmaNS	1065
G722	MT778946.1	S4	S4	source label retained	sigma1	948
G725	MT759502.1	L1	L3	lambda1/core-shell ortholog; canonical PRV L3	lambda1	3849
G725	MT759503.1	L2	L2	source label retained	lambda2	3873
G725	MT759504.1	L3	L1	lambda3/RdRp ortholog; canonical PRV L1	lambda3	3861
G725	MT759505.1	M1	M1	source label retained	mu2	2283
G725	MT759506.1	M2	M2	source label retained	mu1	2070
G725	MT759507.1	M3	M3	source label retained	muNS	2298
G725	MT759508.1	S1	S1	source label retained	sigma3	993
G725	MT759509.1	S2	S2	source label retained	sigma2	1263
G725	MT759510.1	S3	S3	source label retained	sigmaNS	1065
G725	MT759511.1	S4	S4	source label retained	sigma1	948
G781	MT758952.1	L1	L3	lambda1/core-shell ortholog; canonical PRV L3	lambda1	3849
G781	MT758953.1	L2	L2	source label retained	lambda2	3873
G781	MT758954.1	L3	L1	lambda3/RdRp ortholog; canonical PRV L1	lambda3	3861
G781	MT758955.1	M1	M1	source label retained	mu2	2283
G781	MT758956.1	M2	M2	source label retained	mu1	2070
G781	MT758957.1	M3	M3	source label retained	muNS	2298
G781	MT758958.1	S1	S1	source label retained	sigma3	993
G781	MT758959.1	S2	S2	source label retained	sigma2	1263
G781	MT758960.1	S3	S3	source label retained	sigmaNS	1065
G781	MT758961.1	S4	S4	source label retained	sigma1	948
G890	MT759492.1	L1	L3	lambda1/core-shell ortholog; canonical PRV L3	lambda1	3849
G890	MT759493.1	L2	L2	source label retained	lambda2	3873
G890	MT759494.1	L3	L1	lambda3/RdRp ortholog; canonical PRV L1	lambda3	3861
G890	MT759495.1	M1	M1	source label retained	mu2	2283
G890	MT759496.1	M2	M2	source label retained	mu1	2070
G890	MT759497.1	M3	M3	source label retained	muNS	2298
G890	MT759498.1	S1	S1	source label retained	sigma3	993
G890	MT759499.1	S2	S2	source label retained	sigma2	1263
G890	MT759500.1	S3	S3	source label retained	sigmaNS	1065
G890	MT759501.1	S4	S4	source label retained	sigma1	948
NOR-1988	MK675862.1	L1	L1	lambda3/RdRp ortholog; canonical PRV L1	lambda 3	3861
NOR-1988	MK675863.1	L2	L2	source label retained	lambda 2	3873
NOR-1988	MK675864.1	L3	L3	lambda1/core-shell ortholog; canonical PRV L3	lambda 1	3849
NOR-1988	MK675865.1	M1	M1	source label retained	mu2	2283
NOR-1988	MK675866.1	M2	M2	source label retained	mu1	2064
NOR-1988	MK675867.1	M3	M3	source label retained	muNS	2259
NOR-1988	MK675868.1	S1	S1	source label retained	sigma 3	993
NOR-1988	MK675869.1	S2	S2	source label retained	sigma 2	1263
NOR-1988	MK675870.1	S3	S3	source label retained	sigma NS	1065
NOR-1988	MK675871.1	S4	S4	source label retained	sigma 1	948
NOR-2015/MS	MK675842.1	L1	L1	lambda3/RdRp ortholog; canonical PRV L1	lambda 3	3861
NOR-2015/MS	MK675843.1	L2	L2	source label retained	lambda 2	3873
NOR-2015/MS	MK675844.1	L3	L3	lambda1/core-shell ortholog; canonical PRV L3	lambda 1	3849
NOR-2015/MS	MK675845.1	M1	M1	source label retained	mu2	2283
NOR-2015/MS	MK675846.1	M2	M2	source label retained	mu1	2064
NOR-2015/MS	MK675847.1	M3	M3	source label retained	muNS	2259
NOR-2015/MS	MK675848.1	S1	S1	source label retained	sigma 3	993
NOR-2015/MS	MK675849.1	S2	S2	source label retained	sigma 2	1263
NOR-2015/MS	MK675850.1	S3	S3	source label retained	sigma NS	1065
NOR-2015/MS	MK675851.1	S4	S4	source label retained	sigma 1	948
S1003	MT759552.1	L1	L3	lambda1/core-shell ortholog; canonical PRV L3	lambda1	3849
S1003	MT759553.1	L2	L2	source label retained	lambda2	3873
S1003	MT759554.1	L3	L1	lambda3/RdRp ortholog; canonical PRV L1	lambda3	3861
S1003	MT759555.1	M1	M1	source label retained	mu2	2283
S1003	MT759556.1	M2	M2	source label retained	mu1	2070
S1003	MT759557.1	M3	M3	source label retained	muNS	2298
S1003	MT759558.1	S1	S1	source label retained	sigma3	993
S1003	MT759559.1	S2	S2	source label retained	sigma2	1263
S1003	MT759560.1	S3	S3	source label retained	sigmaNS	1065
S1003	MT759561.1	S4	S4	source label retained	sigma1	948
S1053	MT759562.1	L1	L3	lambda1/core-shell ortholog; canonical PRV L3	lambda1	3849
S1053	MT759563.1	L2	L2	source label retained	lambda2	3873
S1053	MT759564.1	L3	L1	lambda3/RdRp ortholog; canonical PRV L1	lambda3	3861
S1053	MT759565.1	M1	M1	source label retained	mu2	2283
S1053	MT759566.1	M2	M2	source label retained	mu1	2070
S1053	MT759567.1	M3	M3	source label retained	muNS	2298
S1053	MT759568.1	S1	S1	source label retained	sigma3	993
S1053	MT759569.1	S2	S2	source label retained	sigma2	1263
S1053	MT759570.1	S3	S3	source label retained	sigmaNS	1065
S1053	MT759571.1	S4	S4	source label retained	sigma1	948
VT06062012-358	KC715679.1	L1	L3	lambda1/core-shell ortholog; canonical PRV L3	core shell protein	3849
VT06062012-358	KC715680.1	L2	L2	source label retained	core turret protein	3873
VT06062012-358	KC715681.1	L3	L1	lambda3/RdRp ortholog; canonical PRV L1	core RNA-dependent RNA polymerase	3861
VT06062012-358	KC715682.1	M1	M1	source label retained	core NTPase	2283
VT06062012-358	KC715683.1	M2	M2	source label retained	outer shell protein	2064
VT06062012-358	KC715684.1	M3	M3	source label retained	non-structural factory protein	2259
VT06062012-358	KC473453.1	S1	S1	source label retained	sigma 1	993
VT06062012-358	KC715685.1	S2	S2	source label retained	core clamp protein	1263
VT06062012-358	KC715686.1	S3	S3	source label retained	non-structural RNA protein	1065
VT06062012-358	KC715687.1	S4	S4	source label retained	outer fiber protein	948
VT06202012-371	KC776256.1	L1	L3	lambda1/core-shell ortholog; canonical PRV L3	core shell protein	3849
VT06202012-371	KC776257.1	L2	L2	source label retained	core turret protein	3873
VT06202012-371	KC776258.1	L3	L1	lambda3/RdRp ortholog; canonical PRV L1	core RNA-dependent RNA polymerase	3861
VT06202012-371	KC776259.1	M1	M1	source label retained	core NTPase	2283
VT06202012-371	KC776260.1	M2	M2	source label retained	outer shell protein	2064
VT06202012-371	KC776261.1	M3	M3	source label retained	non-structural (NS) factory protein	2259
VT06202012-371	KC473454.1	S1	S1	source label retained	sigma 1	993
VT06202012-371	KC776262.1	S2	S2	source label retained	core clamp protein	1263
VT06202012-371	KC776263.1	S3	S3	source label retained	non-structural (NS) RNA protein	1065
VT06202012-371	KC776264.1	S4	S4	source label retained	outer fiber protein	948
mDa115	MW354788.1	L1	L1	lambda3/RdRp ortholog; canonical PRV L1	lambda 3	3861
mDa115	MW354800.1	L2	L2	source label retained	lambda 2	3873
mDa115	MW354812.1	L3	L3	lambda1/core-shell ortholog; canonical PRV L3	lambda 1	3849
mDa115	MW354824.1	M1	M1	source label retained	mu2	2283
mDa115	MW354836.1	M2	M2	source label retained	mu1	2064
mDa115	MW354848.1	M3	M3	source label retained	muNS	2259
mDa115	MW354860.1	S1	S1	source label retained	sigma 3	993
mDa115	MW354872.1	S2	S2	source label retained	sigma 2	1263
mDa115	MW354884.1	S3	S3	source label retained	sigma NS	1065
mDa115	MW354896.1	S4	S4	source label retained	sigma 1	948
mGl118	MW354790.1	L1	L1	lambda3/RdRp ortholog; canonical PRV L1	lambda 3	3861
mGl118	MW354802.1	L2	L2	source label retained	lambda 2	3873
mGl118	MW354814.1	L3	L3	lambda1/core-shell ortholog; canonical PRV L3	lambda 1	3849
mGl118	MW354826.1	M1	M1	source label retained	mu2	2283
mGl118	MW354838.1	M2	M2	source label retained	mu1	2064
mGl118	MW354850.1	M3	M3	source label retained	muNS	2259
mGl118	MW354862.1	S1	S1	source label retained	sigma 3	993
mGl118	MW354874.1	S2	S2	source label retained	sigma 2	1263
mGl118	MW354886.1	S3	S3	source label retained	sigma NS	1065
mGl118	MW354898.1	S4	S4	source label retained	sigma 1	948

## Sheet: Segment Summary
Mean, SD, minimum and maximum across 72 exact-deduplicated complete coding complements for all 11 prespecified metrics.
Segment	GC Mean	GC Std	GC Min	GC Max	GC1 Mean	GC1 Std	GC1 Min	GC1 Max	GC2 Mean	GC2 Std	GC2 Min	GC2 Max	GC3 Mean	GC3 Std	GC3 Min	GC3 Max	GC12 Mean	GC12 Std	GC12 Min	GC12 Max	ENC Mean	ENC Std	ENC Min	ENC Max	CpG Odds Mean	CpG Odds Std	CpG Odds Min	CpG Odds Max	TpA Odds Mean	TpA Odds Std	TpA Odds Min	TpA Odds Max	Host Relative CAI Mean	Host Relative CAI Std	Host Relative CAI Min	Host Relative CAI Max	RCDI Mean	RCDI Std	RCDI Min	RCDI Max	SiD Mean	SiD Std	SiD Min	SiD Max
1	0.453862	0.000567215	0.451788	0.456195	0.508338	0.000541613	0.506998	0.510109	0.398955	0.000389107	0.398134	0.400467	0.454294	0.0015996	0.4479	0.459565	0.453646	0.000346665	0.452955	0.455288	53.7578	0.149558	53.5603	54.3898	0.774026	0.00389559	0.755428	0.784534	0.62501	0.00385743	0.607259	0.629436	0.552883	0.000756836	0.549063	0.554952	1.43054	0.00430833	1.41153	1.43759	0.088669	0.000813059	0.0860291	0.0910768
2	0.448525	0.000532811	0.447545	0.450646	0.519175	0.000853091	0.517829	0.52093	0.408699	0.000349648	0.408527	0.410078	0.4177	0.00109629	0.414729	0.421705	0.463937	0.00051403	0.463178	0.465116	53.4116	0.0887231	53.2094	53.7732	0.805769	0.00368905	0.79421	0.814333	0.647659	0.00567015	0.630469	0.658163	0.553568	0.000454914	0.552703	0.555835	1.46137	0.0031572	1.4456	1.46551	0.0896561	0.000725069	0.0857486	0.0907156
3	0.472457	0.000566178	0.471659	0.475559	0.515698	0.000391386	0.514821	0.517161	0.451573	0.000364459	0.450858	0.453198	0.4501	0.0015763	0.447738	0.459438	0.483636	0.000303078	0.483229	0.484789	53.3919	0.0771908	52.9427	53.6039	0.744731	0.00398533	0.725879	0.759166	0.646169	0.00258539	0.640286	0.6534	0.55336	0.00121336	0.551627	0.559342	1.39065	0.00370556	1.37706	1.39718	0.0780584	0.00092453	0.0753733	0.0792376
4	0.480257	0.00108061	0.478509	0.484211	0.497277	0.000555457	0.496053	0.498684	0.422186	0.000458233	0.421053	0.422368	0.521308	0.00309676	0.517105	0.532895	0.459731	0.000348081	0.459211	0.460526	54.8389	0.168575	54.4989	55.1896	0.764214	0.00838683	0.74059	0.775984	0.469176	0.00682447	0.447539	0.48073	0.596526	0.00116136	0.595196	0.600897	1.26734	0.00639199	1.24773	1.27892	0.0538245	0.00120596	0.0497999	0.056169
5	0.480473	0.000707576	0.478409	0.482825	0.525106	0.00129637	0.522496	0.528384	0.44025	0.00085627	0.438316	0.442671	0.476063	0.00165876	0.47016	0.480406	0.482678	0.00063237	0.481858	0.484761	53.8695	0.159439	53.1586	54.3158	0.61152	0.00551248	0.602798	0.637023	0.48331	0.00699759	0.466081	0.492498	0.5923	0.00239853	0.582687	0.595635	1.28029	0.00380955	1.27355	1.29647	0.0520542	0.0014258	0.0507048	0.0576409
6	0.498276	0.0014655	0.497168	0.503546	0.561955	0.00255392	0.559477	0.570479	0.429125	0.000582186	0.428191	0.430065	0.503748	0.00200532	0.501961	0.511968	0.49554	0.00130766	0.494771	0.5	52.0375	0.0782531	51.8744	52.3819	0.618205	0.005547	0.611626	0.637749	0.355855	0.0161632	0.301496	0.367646	0.596261	0.00110486	0.593891	0.600337	1.32456	0.00342882	1.31341	1.32936	0.0577254	0.000685311	0.0551082	0.0588161
7	0.478788	0.00143852	0.476768	0.482828	0.48548	0.0020304	0.478788	0.490909	0.448232	0.00166754	0.442424	0.451515	0.502652	0.00348443	0.5	0.512121	0.466856	0.00104657	0.463636	0.469697	54.1112	0.619322	53.4687	55.7852	0.869193	0.0112352	0.837009	0.906839	0.527487	0.00836897	0.511399	0.554528	0.591007	0.00422411	0.576113	0.594487	1.40828	0.0152351	1.38059	1.43005	0.0827405	0.0031802	0.07786	0.0894084
8	0.486265	0.00110357	0.481746	0.488095	0.534921	0.00119883	0.533333	0.538095	0.46412	0.00100511	0.461905	0.466667	0.459755	0.00274424	0.447619	0.464286	0.49952	0.000682261	0.497619	0.50119	53.2164	0.115206	52.8128	53.6028	0.862099	0.00640686	0.848569	0.891854	0.68234	0.00617739	0.670706	0.704196	0.553623	0.00148142	0.546532	0.555671	1.39265	0.00640423	1.38477	1.42533	0.0980109	0.00108145	0.096457	0.103263
9	0.471634	0.00121327	0.468927	0.477401	0.528209	0.00111119	0.525424	0.533898	0.409644	0.000579323	0.40678	0.412429	0.477048	0.00307032	0.471751	0.491525	0.468927	0.000711171	0.467514	0.473164	47.782	0.479018	46.0525	49.5158	0.535364	0.0103815	0.498456	0.558086	0.393929	0.00346462	0.379063	0.407707	0.590703	0.00193115	0.583442	0.59748	1.50217	0.0148615	1.44314	1.54583	0.102839	0.00290836	0.0908043	0.111125
10	0.48714	0.000797437	0.484656	0.489947	0.593386	0.00148329	0.587302	0.596825	0.352601	0.00122968	0.349206	0.35873	0.515432	0.00186907	0.514286	0.520635	0.472994	0.0010142	0.469841	0.47619	52.5478	0.355081	51.8089	53.6547	0.598765	0.0091611	0.579125	0.622779	0.339724	0.00496829	0.325803	0.35403	0.585597	0.00136526	0.582255	0.59126	1.44314	0.0128288	1.40755	1.4611	0.0763126	0.00127648	0.0698623	0.0790519

## Sheet: Segment Tests
Friedman statistics, Kendall's W, 9,999 within-isolate label permutations and Benjamini-Hochberg correction across 11 metrics.
Metric	Friedman Q	Df	Kendall W	Permutation P	BH q
GC	635.879	9	0.981294	0.0001	0.0001
GC1	647.148	9	0.998686	0.0001	0.0001
GC2	647.576	9	0.999345	0.0001	0.0001
GC3	638.576	9	0.985456	0.0001	0.0001
GC12	644.312	9	0.994309	0.0001	0.0001
ENC	610.661	9	0.942377	0.0001	0.0001
CpG_odds	640.239	9	0.988024	0.0001	0.0001
TpA_odds	642.442	9	0.991423	0.0001	0.0001
host_relative_CAI	601.876	9	0.928821	0.0001	0.0001
RCDI	627.594	9	0.968509	0.0001	0.0001
SiD	636.848	9	0.982791	0.0001	0.0001

## Sheet: Isolate Correlations
Permutation-tested pooled-complement correlations used to assess compositional and host-metric relationships. These do not partition causal evolutionary forces.
X	Y	N	R	Permutation P	BH q
GC12	GC3	72	0.520918	0.0001	0.0002
ENC	GC3	72	0.341567	0.0054	0.0054
host_relative_CAI	ENC	72	-0.369916	0.001	0.00133333
RCDI	host_relative_CAI	72	-0.825776	0.0001	0.0002

## Sheet: RSCU PCA Scores
Principal-component scores from 59 standardized RSCU dimensions for 720 harmonized principal CDSs.
Sequence Id	Isolate	Segment	PC1	PC2
MT758754.1_L1	0274	1	-0.0154247	-2.88413
MT758753.1_L2	0274	2	0.87101	-2.86203
MT758752.1_L3	0274	3	-1.54289	-0.933427
MT758755.1_M1	0274	4	-0.950589	0.0794226
MT758756.1_M2	0274	5	-0.0940563	-1.56776
MT758757.1_M3	0274	6	0.614619	-0.386276
MT758758.1_S1	0274	7	2.61798	1.41429
MT758759.1_S2	0274	8	-6.14842	-3.08056
MT758760.1_S3	0274	9	8.84928	1.3078
MT758761.1_S4	0274	10	-4.14879	8.13337
MT758824.1_L1	0277	1	-0.0154247	-2.88413
MT758823.1_L2	0277	2	0.829053	-2.88334
MT758822.1_L3	0277	3	-1.54289	-0.933427
MT758825.1_M1	0277	4	-0.950589	0.0794226
MT758826.1_M2	0277	5	-0.0940563	-1.56776
MT758827.1_M3	0277	6	0.614619	-0.386276
MT758828.1_S1	0277	7	2.74213	1.82176
MT758829.1_S2	0277	8	-6.14842	-3.08056
MT758830.1_S3	0277	9	8.84928	1.3078
MT758831.1_S4	0277	10	-4.30047	8.39464
MT758734.1_L1	0314	1	-0.0154247	-2.88413
MT758733.1_L2	0314	2	0.87101	-2.86203
MT758732.1_L3	0314	3	-1.54289	-0.933427
MT758735.1_M1	0314	4	-0.950589	0.0794226
MT758736.1_M2	0314	5	-0.0940563	-1.56776
MT758737.1_M3	0314	6	0.614619	-0.386276
MT758738.1_S1	0314	7	2.74213	1.82176
MT758739.1_S2	0314	8	-6.14842	-3.08056
MT758740.1_S3	0314	9	8.84928	1.3078
MT758741.1_S4	0314	10	-4.14879	8.13337
MT758984.1_L1	0456	1	-0.0154247	-2.88413
MT758983.1_L2	0456	2	0.87101	-2.86203
MT758982.1_L3	0456	3	-1.54289	-0.933427
MT758985.1_M1	0456	4	-0.950589	0.0794226
MT758986.1_M2	0456	5	-0.242431	-1.61702
MT758987.1_M3	0456	6	0.54543	-0.411853
MT758988.1_S1	0456	7	2.74213	1.82176
MT758989.1_S2	0456	8	-6.14842	-3.08056
MT758990.1_S3	0456	9	8.73568	0.78453
MT758991.1_S4	0456	10	-4.14879	8.13337
KR337473.1_L1	050607	1	0.159758	-2.54077
KR337474.1_L2	050607	2	0.932459	-2.93008
KR337475.1_L3	050607	3	-1.46402	-1.11141
KR337476.1_M1	050607	4	-1.55833	0.301096
KR337477.1_M2	050607	5	-0.305785	-2.05906
KR337478.1_M3	050607	6	0.413273	-0.786204
KR337479.1_S1	050607	7	2.65883	1.11613
KR337480.1_S2	050607	8	-5.40877	-3.38367
KR337481.1_S3	050607	9	8.45666	0.865345
KR337482.1_S4	050607	10	-4.46679	7.66886
MT758774.1_L1	3572	1	0.155371	-2.8892
MT758773.1_L2	3572	2	0.836348	-2.74863
MT758772.1_L3	3572	3	-1.6146	-1.15558
MT758775.1_M1	3572	4	-1.02688	0.361836
MT758776.1_M2	3572	5	-0.214124	-1.59627
MT758777.1_M3	3572	6	0.430796	-0.537472
MT758778.1_S1	3572	7	2.79791	1.80034
MT758779.1_S2	3572	8	-6.14842	-3.08056
MT758780.1_S3	3572	9	8.84928	1.3078
MT758781.1_S4	3572	10	-4.14879	8.13337
MT759134.1_L1	4255	1	-0.0373764	-2.8187
MT759133.1_L2	4255	2	0.836002	-2.7889
MT759132.1_L3	4255	3	-1.61233	-0.983819
MT759135.1_M1	4255	4	-1.15869	0.427736
MT759136.1_M2	4255	5	-0.0541858	-1.1068
MT759137.1_M3	4255	6	0.402264	-0.484361
MT759138.1_S1	4255	7	2.92974	1.93605
MT759139.1_S2	4255	8	-6.39232	-3.24394
MT759140.1_S3	4255	9	8.84928	1.3078
MT759141.1_S4	4255	10	-4.03974	8.39675
MT759144.1_L1	4256	1	-0.034012	-2.85105
MT759143.1_L2	4256	2	0.836348	-2.74863
MT759142.1_L3	4256	3	-1.57471	-1.01987
MT759145.1_M1	4256	4	-1.11704	0.343524
MT759146.1_M2	4256	5	-0.0378517	-1.07049
MT759147.1_M3	4256	6	0.430796	-0.537472
MT759148.1_S1	4256	7	2.92974	1.93605
MT759149.1_S2	4256	8	-6.26031	-3.12876
MT759150.1_S3	4256	9	8.84928	1.3078
MT759151.1_S4	4256	10	-4.08003	8.25741
MT759154.1_L1	4299	1	-0.0946504	-2.90985
MT759153.1_L2	4299	2	0.800334	-2.73458
MT759152.1_L3	4299	3	-1.57559	-1.03077
MT759155.1_M1	4299	4	-1.11704	0.343524
MT759156.1_M2	4299	5	-0.0541858	-1.1068
MT759157.1_M3	4299	6	0.430796	-0.537472
MT759158.1_S1	4299	7	2.92974	1.93605
MT759159.1_S2	4299	8	-6.26031	-3.12876
MT759160.1_S3	4299	9	8.88267	1.35296
MT759161.1_S4	4299	10	-4.08003	8.25741
MT759164.1_L1	4302	1	-0.0946504	-2.90985
MT759163.1_L2	4302	2	0.800334	-2.73458
MT759162.1_L3	4302	3	-1.57559	-1.03077
MT759165.1_M1	4302	4	-1.0334	0.456094
MT759166.1_M2	4302	5	-0.0541858	-1.1068
MT759167.1_M3	4302	6	0.430796	-0.537472
MT759168.1_S1	4302	7	2.92974	1.93605
MT759169.1_S2	4302	8	-6.26031	-3.12876
MT759170.1_S3	4302	9	8.84928	1.3078
MT759171.1_S4	4302	10	-4.08003	8.25741
MT759174.1_L1	4335	1	0.155371	-2.8892
MT759173.1_L2	4335	2	0.836348	-2.74863
MT759172.1_L3	4335	3	-1.57383	-1.00897
MT759175.1_M1	4335	4	-0.970263	0.237572
MT759176.1_M2	4335	5	-0.170553	-1.53288
MT759177.1_M3	4335	6	0.460159	-0.501478
MT759178.1_S1	4335	7	2.92974	1.93605
MT759179.1_S2	4335	8	-6.14842	-3.08056
MT759180.1_S3	4335	9	9.10625	1.12836
MT759181.1_S4	4335	10	-4.08003	8.25741
MT758764.1_L1	5740	1	-0.0861676	-2.89242
MT758763.1_L2	5740	2	0.91757	-2.82085
MT758762.1_L3	5740	3	-1.54289	-0.933427
MT758765.1_M1	5740	4	-1.05054	0.309662
MT758766.1_M2	5740	5	-0.235314	-1.60416
MT758767.1_M3	5740	6	0.460159	-0.501478
MT758768.1_S1	5740	7	2.92293	1.93118
MT758769.1_S2	5740	8	-6.14842	-3.08056
MT758770.1_S3	5740	9	8.84928	1.3078
MT758771.1_S4	5740	10	-4.08003	8.25741
MT758974.1_L1	5814	1	5.469e-06	-2.79959
MT758973.1_L2	5814	2	0.87101	-2.86203
MT758972.1_L3	5814	3	-1.54289	-0.933427
MT758975.1_M1	5814	4	-0.950589	0.0794226
MT758976.1_M2	5814	5	-0.0940563	-1.56776
MT758977.1_M3	5814	6	0.614619	-0.386276
MT758978.1_S1	5814	7	2.74213	1.82176
MT758979.1_S2	5814	8	-6.14842	-3.08056
MT758980.1_S3	5814	9	8.84928	1.3078
MT758981.1_S4	5814	10	-4.14879	8.13337
MT758844.1_L1	7114	1	-0.0154247	-2.88413
MT758843.1_L2	7114	2	0.91757	-2.82085
MT758842.1_L3	7114	3	-1.54289	-0.933427
MT758845.1_M1	7114	4	-1.00632	0.227339
MT758846.1_M2	7114	5	-0.0845166	-1.55486
MT758847.1_M3	7114	6	0.486567	-0.419959
MT758848.1_S1	7114	7	2.92974	1.93605
MT758849.1_S2	7114	8	-6.14842	-3.08056
MT758850.1_S3	7114	9	8.84928	1.3078
MT758851.1_S4	7114	10	-4.08003	8.25741
MT758864.1_L1	7117	1	-0.0154247	-2.88413
MT758863.1_L2	7117	2	0.84322	-2.85834
MT758862.1_L3	7117	3	-1.54289	-0.933427
MT758865.1_M1	7117	4	-1.00632	0.227339
MT758866.1_M2	7117	5	-0.0940563	-1.56776
MT758867.1_M3	7117	6	0.612214	-0.450571
MT758868.1_S1	7117	7	2.92293	1.93118
MT758869.1_S2	7117	8	-6.14842	-3.08056
MT758870.1_S3	7117	9	8.84928	1.3078
MT758871.1_S4	7117	10	-4.08003	8.25741
MT758834.1_L1	7230	1	0.155371	-2.8892
MT758833.1_L2	7230	2	0.934146	-2.76968
MT758832.1_L3	7230	3	-1.60877	-1.03958
MT758835.1_M1	7230	4	-1.00556	0.311466
MT758836.1_M2	7230	5	-0.232515	-1.49564
MT758837.1_M3	7230	6	0.460159	-0.501478
MT758838.1_S1	7230	7	2.94362	1.83953
MT758839.1_S2	7230	8	-6.14842	-3.08056
MT758840.1_S3	7230	9	8.71158	1.43289
MT758841.1_S4	7230	10	-4.14879	8.13337
MT759024.1_L1	7740	1	-0.084478	-2.83465
MT759023.1_L2	7740	2	1.03477	-2.89055
MT759022.1_L3	7740	3	-1.62512	-0.948371
MT759025.1_M1	7740	4	-1.0078	0.209022
MT759026.1_M2	7740	5	-0.151283	-1.37108
MT759027.1_M3	7740	6	0.327812	-0.690122
MT759028.1_S1	7740	7	2.80698	1.74832
MT759029.1_S2	7740	8	-6.3095	-2.91815
MT759030.1_S3	7740	9	9.08402	1.33528
MT759031.1_S4	7740	10	-4.08003	8.25741
MT759034.1_L1	7805	1	-0.0154247	-2.88413
MT759033.1_L2	7805	2	0.91757	-2.82085
MT759032.1_L3	7805	3	-1.54289	-0.933427
MT759035.1_M1	7805	4	-1.05054	0.309662
MT759036.1_M2	7805	5	0.0324007	-1.56281
MT759037.1_M3	7805	6	0.460159	-0.501478
MT759038.1_S1	7805	7	2.92293	1.93118
MT759039.1_S2	7805	8	-6.14842	-3.08056
MT759040.1_S3	7805	9	8.84928	1.3078
MT759041.1_S4	7805	10	-3.79404	8.36313
MT759044.1_L1	7825	1	-0.0154247	-2.88413
MT759043.1_L2	7825	2	0.91757	-2.82085
MT759042.1_L3	7825	3	-1.55676	-0.956
MT759045.1_M1	7825	4	-1.05054	0.309662
MT759046.1_M2	7825	5	0.0324007	-1.56281
MT759047.1_M3	7825	6	0.460159	-0.501478
MT759048.1_S1	7825	7	2.92293	1.93118
MT759049.1_S2	7825	8	-6.14842	-3.08056
MT759050.1_S3	7825	9	8.84928	1.3078
MT759051.1_S4	7825	10	-3.79404	8.36313
MT758874.1_L1	7926	1	-0.0154247	-2.88413
MT758873.1_L2	7926	2	0.905651	-2.86023
MT758872.1_L3	7926	3	-1.54289	-0.933427
MT758875.1_M1	7926	4	-1.04312	0.172723
MT758876.1_M2	7926	5	-0.104213	-1.58596
MT758877.1_M3	7926	6	0.614619	-0.386276
MT758878.1_S1	7926	7	2.92293	1.93118
MT758879.1_S2	7926	8	-6.15123	-3.11526
MT758880.1_S3	7926	9	8.8502	1.44129
MT758881.1_S4	7926	10	-4.08431	8.14293
MT758814.1_L1	8820	1	-0.0682429	-2.89164
MT758813.1_L2	8820	2	0.91757	-2.82085
MT758812.1_L3	8820	3	-1.57471	-1.01987
MT758815.1_M1	8820	4	-1.11704	0.343524
MT758816.1_M2	8820	5	-0.0541858	-1.1068
MT758817.1_M3	8820	6	0.430796	-0.537472
MT758818.1_S1	8820	7	2.92974	1.93605
MT758819.1_S2	8820	8	-6.24307	-3.10545
MT758820.1_S3	8820	9	8.78696	1.11541
MT758821.1_S4	8820	10	-4.08003	8.25741
MT758704.1_L1	9310	1	-0.0682429	-2.89164
MT758703.1_L2	9310	2	0.836002	-2.7889
MT758702.1_L3	9310	3	-1.61261	-1.02499
MT758705.1_M1	9310	4	-1.11704	0.343524
MT758706.1_M2	9310	5	-0.0541858	-1.1068
MT758707.1_M3	9310	6	0.402264	-0.484361
MT758708.1_S1	9310	7	2.92974	1.93605
MT758709.1_S2	9310	8	-6.39232	-3.24394
MT758710.1_S3	9310	9	8.84928	1.3078
MT758711.1_S4	9310	10	-4.03974	8.39675
MT758994.1_L1	B0404	1	-0.0154247	-2.88413
MT758993.1_L2	B0404	2	0.87101	-2.86203
MT758992.1_L3	B0404	3	-1.52035	-0.934617
MT758995.1_M1	B0404	4	-0.950589	0.0794226
MT758996.1_M2	B0404	5	-0.0940563	-1.56776
MT758997.1_M3	B0404	6	0.614619	-0.386276
MT758998.1_S1	B0404	7	2.74213	1.82176
MT758999.1_S2	B0404	8	-6.14842	-3.08056
MT759000.1_S3	B0404	9	8.84928	1.3078
MT759001.1_S4	B0404	10	-4.14879	8.13337
MT758894.1_L1	B2176	1	-0.0144288	-2.92342
MT758893.1_L2	B2176	2	0.836348	-2.74863
MT758892.1_L3	B2176	3	-1.57471	-1.01987
MT758895.1_M1	B2176	4	-1.09368	0.471552
MT758896.1_M2	B2176	5	-0.0541858	-1.1068
MT758897.1_M3	B2176	6	0.542217	-0.584216
MT758898.1_S1	B2176	7	2.93217	1.67119
MT758899.1_S2	B2176	8	-6.19216	-2.75535
MT758900.1_S3	B2176	9	8.84928	1.3078
MT758901.1_S4	B2176	10	-4.08003	8.25741
MT759194.1_L1	B5392	1	0.0974013	-2.91063
MT759193.1_L2	B5392	2	0.886576	-2.88213
MT759192.1_L3	B5392	3	-1.65652	-1.07253
MT759195.1_M1	B5392	4	-1.02688	0.361836
MT759196.1_M2	B5392	5	-0.282981	-1.59978
MT759197.1_M3	B5392	6	0.460159	-0.501478
MT759198.1_S1	B5392	7	2.79791	1.80034
MT759199.1_S2	B5392	8	-6.14842	-3.08056
MT759200.1_S3	B5392	9	8.4545	1.19856
MT759201.1_S4	B5392	10	-4.14879	8.13337
MT759064.1_L1	B5591	1	-0.0373764	-2.8187
MT759063.1_L2	B5591	2	0.91757	-2.82085
MT759062.1_L3	B5591	3	-1.56463	-1.01086
MT759065.1_M1	B5591	4	-1.09368	0.471552
MT759066.1_M2	B5591	5	-0.0541858	-1.1068
MT759067.1_M3	B5591	6	0.506426	-0.518114
MT759068.1_S1	B5591	7	2.92974	1.93605
MT759069.1_S2	B5591	8	-6.14842	-3.08056
MT759070.1_S3	B5591	9	8.78696	1.11541
MT759071.1_S4	B5591	10	-4.11808	8.32016
MT759074.1_L1	B5593	1	-0.0373764	-2.8187
MT759073.1_L2	B5593	2	0.91757	-2.82085
MT759072.1_L3	B5593	3	-1.61261	-1.02499
MT759075.1_M1	B5593	4	-1.15869	0.427736
MT759076.1_M2	B5593	5	-0.0541858	-1.1068
MT759077.1_M3	B5593	6	0.402264	-0.484361
MT759078.1_S1	B5593	7	2.92974	1.93605
MT759079.1_S2	B5593	8	-6.14842	-3.08056
MT759080.1_S3	B5593	9	8.84928	1.3078
MT759081.1_S4	B5593	10	-4.03974	8.39675
MT759104.1_L1	B5597	1	0.00387597	-2.8348
MT759103.1_L2	B5597	2	0.836348	-2.74863
MT759102.1_L3	B5597	3	-1.57471	-1.01987
MT759105.1_M1	B5597	4	-1.11704	0.343524
MT759106.1_M2	B5597	5	-0.0541858	-1.1068
MT759107.1_M3	B5597	6	0.518075	-0.499101
MT759108.1_S1	B5597	7	2.92974	1.93605
MT759109.1_S2	B5597	8	-6.24307	-3.10545
MT759110.1_S3	B5597	9	8.78696	1.11541
MT759111.1_S4	B5597	10	-4.11808	8.32016
MT759004.1_L1	B7146	1	-0.103822	-2.93741
MT759003.1_L2	B7146	2	0.840014	-2.8562
MT759002.1_L3	B7146	3	-1.57471	-1.01987
MT759005.1_M1	B7146	4	-1.09368	0.471552
MT759006.1_M2	B7146	5	-0.0541858	-1.1068
MT759007.1_M3	B7146	6	0.460159	-0.501478
MT759008.1_S1	B7146	7	2.79791	1.80034
MT759009.1_S2	B7146	8	-6.14842	-3.08056
MT759010.1_S3	B7146	9	8.71158	1.43289
MT759011.1_S4	B7146	10	-4.14879	8.13337
MT759404.1_L1	B7283	1	0.140926	-2.89541
MT759403.1_L2	B7283	2	0.91757	-2.82085
MT759402.1_L3	B7283	3	-1.57471	-1.01987
MT759405.1_M1	B7283	4	-1.09368	0.471552
MT759406.1_M2	B7283	5	-0.0541858	-1.1068
MT759407.1_M3	B7283	6	0.433778	-0.646025
MT759408.1_S1	B7283	7	2.92974	1.93605
MT759409.1_S2	B7283	8	-6.14842	-3.08056
MT759410.1_S3	B7283	9	8.84928	1.3078
MT759411.1_S4	B7283	10	-4.33945	8.23031
MT759394.1_L1	B7286	1	-0.0373764	-2.8187
MT759393.1_L2	B7286	2	0.91757	-2.82085
MT759392.1_L3	B7286	3	-1.57471	-1.01987
MT759395.1_M1	B7286	4	-1.04326	0.513444
MT759396.1_M2	B7286	5	-0.0541858	-1.1068
MT759397.1_M3	B7286	6	0.460159	-0.501478
MT759398.1_S1	B7286	7	2.92974	1.93605
MT759399.1_S2	B7286	8	-6.14842	-3.08056
MT759400.1_S3	B7286	9	8.78696	1.11541
MT759401.1_S4	B7286	10	-3.86064	8.45466
MT759244.1_L1	B7293	1	0.107807	-2.91491
MT759243.1_L2	B7293	2	0.91757	-2.82085
MT759242.1_L3	B7293	3	-1.54494	-0.914173
MT759245.1_M1	B7293	4	-1.09368	0.471552
MT759246.1_M2	B7293	5	-0.0541858	-1.1068
MT759247.1_M3	B7293	6	0.402264	-0.484361
MT759248.1_S1	B7293	7	2.79791	1.80034
MT759249.1_S2	B7293	8	-6.14842	-3.08056
MT759250.1_S3	B7293	9	8.84928	1.3078
MT759251.1_S4	B7293	10	-4.03974	8.39675
MT759114.1_L1	B7437	1	-0.0144288	-2.92342
MT759113.1_L2	B7437	2	0.836348	-2.74863
MT759112.1_L3	B7437	3	-1.61261	-1.02499
MT759115.1_M1	B7437	4	-1.09368	0.471552
MT759116.1_M2	B7437	5	-0.0541858	-1.1068
MT759117.1_M3	B7437	6	0.542217	-0.584216
MT759118.1_S1	B7437	7	2.93217	1.67119
MT759119.1_S2	B7437	8	-6.19216	-2.75535
MT759120.1_S3	B7437	9	8.84928	1.3078
MT759121.1_S4	B7437	10	-4.08003	8.25741
MT759254.1_L1	B7453	1	-0.0682429	-2.89164
MT759253.1_L2	B7453	2	0.768737	-2.78453
MT759252.1_L3	B7453	3	-1.61261	-1.02499
MT759255.1_M1	B7453	4	-1.02688	0.361836
MT759256.1_M2	B7453	5	-0.0541858	-1.1068
MT759257.1_M3	B7453	6	0.430796	-0.537472
MT759258.1_S1	B7453	7	2.92974	1.93605
MT759259.1_S2	B7453	8	-6.27995	-3.11077
MT759260.1_S3	B7453	9	8.84928	1.3078
MT759261.1_S4	B7453	10	-3.86064	8.45466
MT759084.1_L1	B7474	1	-0.0682429	-2.89164
MT759083.1_L2	B7474	2	0.91757	-2.82085
MT759082.1_L3	B7474	3	-1.63619	-0.983513
MT759085.1_M1	B7474	4	-0.954293	0.51782
MT759086.1_M2	B7474	5	-0.0541858	-1.1068
MT759087.1_M3	B7474	6	0.460159	-0.501478
MT759088.1_S1	B7474	7	2.92974	1.93605
MT759089.1_S2	B7474	8	-6.14842	-3.08056
MT759090.1_S3	B7474	9	8.78696	1.11541
MT759091.1_S4	B7474	10	-4.03974	8.39675
MT759094.1_L1	B7483	1	-0.0682429	-2.89164
MT759093.1_L2	B7483	2	0.851675	-2.75441
MT759092.1_L3	B7483	3	-1.61261	-1.02499
MT759095.1_M1	B7483	4	-1.09622	0.27601
MT759096.1_M2	B7483	5	-0.169001	-1.19347
MT759097.1_M3	B7483	6	0.430796	-0.537472
MT759098.1_S1	B7483	7	2.92974	1.93605
MT759099.1_S2	B7483	8	-6.24307	-3.10545
MT759100.1_S3	B7483	9	8.84928	1.3078
MT759101.1_S4	B7483	10	-3.86064	8.45466
MT759264.1_L1	B7669	1	-0.0682429	-2.89164
MT759263.1_L2	B7669	2	0.81135	-2.67083
MT759262.1_L3	B7669	3	-1.61261	-1.02499
MT759265.1_M1	B7669	4	-1.09622	0.27601
MT759266.1_M2	B7669	5	-0.0541858	-1.1068
MT759267.1_M3	B7669	6	0.430796	-0.537472
MT759268.1_S1	B7669	7	2.92974	1.93605
MT759269.1_S2	B7669	8	-6.24307	-3.10545
MT759270.1_S3	B7669	9	8.84928	1.3078
MT759271.1_S4	B7669	10	-3.86064	8.45466
MT759324.1_L1	B7803	1	0.0563141	-2.91514
MT759323.1_L2	B7803	2	0.836348	-2.74863
MT759322.1_L3	B7803	3	-1.57471	-1.01987
MT759325.1_M1	B7803	4	-1.09368	0.471552
MT759326.1_M2	B7803	5	-0.0541858	-1.1068
MT759327.1_M3	B7803	6	0.542217	-0.584216
MT759328.1_S1	B7803	7	2.93217	1.67119
MT759329.1_S2	B7803	8	-6.19216	-2.75535
MT759330.1_S3	B7803	9	8.84928	1.3078
MT759331.1_S4	B7803	10	-4.08003	8.25741
MT759414.1_L1	B7811	1	-0.0144288	-2.92342
MT759413.1_L2	B7811	2	0.836348	-2.74863
MT759412.1_L3	B7811	3	-1.57471	-1.01987
MT759415.1_M1	B7811	4	-1.09368	0.471552
MT759416.1_M2	B7811	5	-0.214124	-1.59627
MT759417.1_M3	B7811	6	0.542217	-0.584216
MT759418.1_S1	B7811	7	2.93217	1.67119
MT759419.1_S2	B7811	8	-6.19216	-2.75535
MT759420.1_S3	B7811	9	8.84928	1.3078
MT759421.1_S4	B7811	10	-3.98595	8.16001
MT759274.1_L1	B7874	1	-0.0566048	-2.81681
MT759273.1_L2	B7874	2	0.873642	-2.59861
MT759272.1_L3	B7874	3	-1.64518	-1.0426
MT759275.1_M1	B7874	4	-1.19943	0.35423
MT759276.1_M2	B7874	5	-0.370965	-1.01724
MT759277.1_M3	B7874	6	0.402264	-0.484361
MT759278.1_S1	B7874	7	2.92974	1.93605
MT759279.1_S2	B7874	8	-6.4292	-3.24926
MT759280.1_S3	B7874	9	8.92385	1.62266
MT759281.1_S4	B7874	10	-4.03974	8.39675
MT759284.1_L1	B7875	1	0.107807	-2.91491
MT759283.1_L2	B7875	2	0.91757	-2.82085
MT759282.1_L3	B7875	3	-1.48524	-0.937478
MT759285.1_M1	B7875	4	-1.09368	0.471552
MT759286.1_M2	B7875	5	-0.0541858	-1.1068
MT759287.1_M3	B7875	6	0.402264	-0.484361
MT759288.1_S1	B7875	7	2.79791	1.80034
MT759289.1_S2	B7875	8	-6.14842	-3.08056
MT759290.1_S3	B7875	9	8.84928	1.3078
MT759291.1_S4	B7875	10	-4.03974	8.39675
MT759294.1_L1	B7877	1	-0.0682429	-2.89164
MT759293.1_L2	B7877	2	0.864674	-2.80147
MT759292.1_L3	B7877	3	-1.66875	-1.00112
MT759295.1_M1	B7877	4	-0.954293	0.51782
MT759296.1_M2	B7877	5	-0.173601	-1.06019
MT759297.1_M3	B7877	6	0.460159	-0.501478
MT759298.1_S1	B7877	7	2.92974	1.93605
MT759299.1_S2	B7877	8	-6.14842	-3.08056
MT759300.1_S3	B7877	9	8.78696	1.11541
MT759301.1_S4	B7877	10	-4.03974	8.39675
MT759304.1_L1	B7883	1	-0.0373764	-2.8187
MT759303.1_L2	B7883	2	0.91757	-2.82085
MT759302.1_L3	B7883	3	-1.57471	-1.01987
MT759305.1_M1	B7883	4	-1.04326	0.513444
MT759306.1_M2	B7883	5	0.0244917	-0.951255
MT759307.1_M3	B7883	6	0.460159	-0.501478
MT759308.1_S1	B7883	7	2.92974	1.93605
MT759309.1_S2	B7883	8	-6.14842	-3.08056
MT759310.1_S3	B7883	9	8.78696	1.11541
MT759311.1_S4	B7883	10	-3.86064	8.45466
MT759314.1_L1	B7888	1	-0.0373764	-2.8187
MT759313.1_L2	B7888	2	0.876293	-2.74905
MT759312.1_L3	B7888	3	-1.57471	-1.01987
MT759315.1_M1	B7888	4	-1.04326	0.513444
MT759316.1_M2	B7888	5	-0.0541858	-1.1068
MT759317.1_M3	B7888	6	0.460159	-0.501478
MT759318.1_S1	B7888	7	2.92974	1.93605
MT759319.1_S2	B7888	8	-6.14842	-3.08056
MT759320.1_S3	B7888	9	8.78696	1.11541
MT759321.1_S4	B7888	10	-3.86064	8.45466
MT759184.1_L1	B7910	1	-0.0458998	-2.98564
MT759183.1_L2	B7910	2	0.836348	-2.74863
MT759182.1_L3	B7910	3	-1.57471	-1.01987
MT759185.1_M1	B7910	4	-1.09368	0.471552
MT759186.1_M2	B7910	5	-0.0541858	-1.1068
MT759187.1_M3	B7910	6	0.542217	-0.584216
MT759188.1_S1	B7910	7	2.93217	1.67119
MT759189.1_S2	B7910	8	-6.19216	-2.75535
MT759190.1_S3	B7910	9	8.84928	1.3078
MT759191.1_S4	B7910	10	-4.08003	8.25741
NC_036477.1_L1	CGA280-05	1	0.102724	-2.60746
NC_036468.1_L2	CGA280-05	2	0.925981	-2.97047
NC_036476.1_L3	CGA280-05	3	-1.7244	-1.10555
NC_036469.1_M1	CGA280-05	4	-1.58621	0.360588
NC_036470.1_M2	CGA280-05	5	-0.604564	-2.38349
NC_036471.1_M3	CGA280-05	6	0.337838	-0.553798
NC_036472.1_S1	CGA280-05	7	2.30804	0.810433
NC_036473.1_S2	CGA280-05	8	-5.56985	-3.22126
NC_036474.1_S3	CGA280-05	9	7.86725	0.738766
NC_036475.1_S4	CGA280-05	10	-4.00061	8.3183
MT759434.1_L1	D5324	1	-0.0144288	-2.92342
MT759433.1_L2	D5324	2	0.837916	-2.70673
MT759432.1_L3	D5324	3	-1.57471	-1.01987
MT759435.1_M1	D5324	4	-1.15136	0.443911
MT759436.1_M2	D5324	5	-0.0541858	-1.1068
MT759437.1_M3	D5324	6	0.542217	-0.584216
MT759438.1_S1	D5324	7	2.81074	1.52261
MT759439.1_S2	D5324	8	-6.19216	-2.75535
MT759440.1_S3	D5324	9	8.96273	1.26352
MT759441.1_S4	D5324	10	-4.08003	8.25741
MK675882.1_L1	FO/41/16	1	0.193166	-2.70146
MK675883.1_L2	FO/41/16	2	0.714726	-2.79764
MK675884.1_L3	FO/41/16	3	-1.59934	-1.12341
MK675885.1_M1	FO/41/16	4	-1.4035	0.636552
MK675886.1_M2	FO/41/16	5	-0.92345	-1.93514
MK675887.1_M3	FO/41/16	6	0.627275	-0.623142
MK675888.1_S1	FO/41/16	7	2.87634	1.96279
MK675889.1_S2	FO/41/16	8	-5.46696	-3.08888
MK675890.1_S3	FO/41/16	9	8.65855	1.64203
MK675891.1_S4	FO/41/16	10	-3.48641	7.66931
MT759454.1_L1	G33	1	0.239306	-2.85185
MT759453.1_L2	G33	2	0.845046	-2.98358
MT759452.1_L3	G33	3	-1.54144	-0.894637
MT759455.1_M1	G33	4	-1.00632	0.227339
MT759456.1_M2	G33	5	-0.0940563	-1.56776
MT759457.1_M3	G33	6	0.54543	-0.411853
MT759458.1_S1	G33	7	2.79115	1.61981
MT759459.1_S2	G33	8	-6.18368	-3.09573
MT759460.1_S3	G33	9	8.84928	1.3078
MT759461.1_S4	G33	10	-4.08003	8.25741
MT759544.1_L1	G347	1	-0.117492	-2.78473
MT759543.1_L2	G347	2	0.931013	-2.83365
MT759542.1_L3	G347	3	-1.48484	-0.961689
MT759545.1_M1	G347	4	-1.16714	0.119082
MT759546.1_M2	G347	5	-0.0956983	-1.58805
MT759547.1_M3	G347	6	0.550602	-0.430693
MT759548.1_S1	G347	7	2.92293	1.93118
MT759549.1_S2	G347	8	-6.3095	-2.91815
MT759550.1_S3	G347	9	8.84928	1.3078
MT759551.1_S4	G347	10	-4.14879	8.13337
MT778889.1_L1	G364	1	-0.117492	-2.78473
MT778888.1_L2	G364	2	0.957179	-2.83498
MT778887.1_L3	G364	3	-1.50585	-1.00702
MT778890.1_M1	G364	4	-1.10725	0.0851559
MT778891.1_M2	G364	5	-0.0495039	-1.63836
MT778892.1_M3	G364	6	0.550602	-0.430693
MT778893.1_S1	G364	7	2.84805	1.76781
MT778894.1_S2	G364	8	-6.3095	-2.91815
MT778895.1_S3	G364	9	8.84928	1.3078
MT778896.1_S4	G364	10	-4.23235	7.93591
MT759524.1_L1	G44	1	-0.0666611	-2.84935
MT759523.1_L2	G44	2	0.872362	-2.76269
MT759522.1_L3	G44	3	-1.57471	-1.01987
MT759525.1_M1	G44	4	-1.11704	0.343524
MT759526.1_M2	G44	5	-0.0541858	-1.1068
MT759527.1_M3	G44	6	0.430796	-0.537472
MT759528.1_S1	G44	7	2.92974	1.93605
MT759529.1_S2	G44	8	-6.26031	-3.12876
MT759530.1_S3	G44	9	8.84928	1.3078
MT759531.1_S4	G44	10	-4.08003	8.25741
MT778899.1_L1	G459	1	-0.0274616	-2.91236
MT778898.1_L2	G459	2	0.96891	-2.85117
MT778897.1_L3	G459	3	-1.54289	-0.933427
MT778900.1_M1	G459	4	-1.05054	0.309662
MT778901.1_M2	G459	5	0.148818	-1.56096
MT778902.1_M3	G459	6	0.460159	-0.501478
MT778903.1_S1	G459	7	2.92293	1.93118
MT778904.1_S2	G459	8	-6.14842	-3.08056
MT778905.1_S3	G459	9	8.34648	1.49622
MT778906.1_S4	G459	10	-4.08003	8.25741
MT759534.1_L1	G463	1	0.0623287	-2.87431
MT759533.1_L2	G463	2	0.836348	-2.74863
MT759532.1_L3	G463	3	-1.57471	-1.01987
MT759535.1_M1	G463	4	-1.09368	0.471552
MT759536.1_M2	G463	5	-0.0541858	-1.1068
MT759537.1_M3	G463	6	0.542217	-0.584216
MT759538.1_S1	G463	7	2.72987	1.69482
MT759539.1_S2	G463	8	-6.19216	-2.75535
MT759540.1_S3	G463	9	8.84928	1.3078
MT759541.1_S4	G463	10	-4.08003	8.25741
MT759484.1_L1	G523	1	0.155371	-2.8892
MT759483.1_L2	G523	2	0.91757	-2.82085
MT759482.1_L3	G523	3	-1.57471	-1.01987
MT759485.1_M1	G523	4	-1.00556	0.311466
MT759486.1_M2	G523	5	-0.232515	-1.49564
MT759487.1_M3	G523	6	0.470477	-0.446319
MT759488.1_S1	G523	7	2.94362	1.83953
MT759489.1_S2	G523	8	-6.16904	-3.09502
MT759490.1_S3	G523	9	8.71158	1.43289
MT759491.1_S4	G523	10	-4.08003	8.25741
MT759124.1_L1	G537	1	0.0974013	-2.91063
MT759123.1_L2	G537	2	0.886576	-2.88213
MT759122.1_L3	G537	3	-1.64515	-1.03621
MT759125.1_M1	G537	4	-1.02688	0.361836
MT759126.1_M2	G537	5	-0.214124	-1.59627
MT759127.1_M3	G537	6	0.460159	-0.501478
MT759128.1_S1	G537	7	2.79791	1.80034
MT759129.1_S2	G537	8	-6.14842	-3.08056
MT759130.1_S3	G537	9	8.64926	1.2405
MT759131.1_S4	G537	10	-4.14879	8.13337
MT778909.1_L1	G563	1	-0.117492	-2.78473
MT778908.1_L2	G563	2	0.803995	-2.84242
MT778907.1_L3	G563	3	-1.45688	-0.954808
MT778910.1_M1	G563	4	-1.10725	0.0851559
MT778911.1_M2	G563	5	-0.0478619	-1.61807
MT778912.1_M3	G563	6	0.550602	-0.430693
MT778913.1_S1	G563	7	2.92293	1.93118
MT778914.1_S2	G563	8	-6.3095	-2.91815
MT778915.1_S3	G563	9	8.90899	1.31641
MT778916.1_S4	G563	10	-4.23235	7.93591
MT778919.1_L1	G572	1	-0.0501202	-2.7979
MT778918.1_L2	G572	2	0.911096	-2.86547
MT778917.1_L3	G572	3	-1.63777	-1.0532
MT778920.1_M1	G572	4	-1.01495	0.172985
MT778921.1_M2	G572	5	-0.214175	-1.56279
MT778922.1_M3	G572	6	0.391369	-0.516775
MT778923.1_S1	G572	7	2.73571	1.85489
MT778924.1_S2	G572	8	-6.14842	-3.08056
MT778925.1_S3	G572	9	8.88312	1.28952
MT778926.1_S4	G572	10	-3.83246	8.39056
MT778929.1_L1	G578	1	-0.117492	-2.78473
MT778928.1_L2	G578	2	0.846252	-2.83762
MT778927.1_L3	G578	3	-1.47327	-1.02436
MT778930.1_M1	G578	4	-1.10725	0.0851559
MT778931.1_M2	G578	5	-0.0478619	-1.61807
MT778932.1_M3	G578	6	0.550602	-0.430693
MT778933.1_S1	G578	7	2.92293	1.93118
MT778934.1_S2	G578	8	-6.3095	-2.91815
MT778935.1_S3	G578	9	8.84928	1.3078
MT778936.1_S4	G578	10	-4.23235	7.93591
MT759444.1_L1	G677	1	-0.0154247	-2.88413
MT759443.1_L2	G677	2	0.865804	-2.94614
MT759442.1_L3	G677	3	-1.54144	-0.894637
MT759445.1_M1	G677	4	-1.00632	0.227339
MT759446.1_M2	G677	5	-0.0940563	-1.56776
MT759447.1_M3	G677	6	0.54543	-0.411853
MT759448.1_S1	G677	7	2.79115	1.61981
MT759449.1_S2	G677	8	-6.18368	-3.09573
MT759450.1_S3	G677	9	8.84928	1.3078
MT759451.1_S4	G677	10	-4.08003	8.25741
MT758884.1_L1	G707	1	-0.0942926	-2.88392
MT758883.1_L2	G707	2	0.800334	-2.73458
MT758882.1_L3	G707	3	-1.57471	-1.01987
MT758885.1_M1	G707	4	-1.11704	0.343524
MT758886.1_M2	G707	5	-0.0541858	-1.1068
MT758887.1_M3	G707	6	0.430796	-0.537472
MT758888.1_S1	G707	7	2.92974	1.93605
MT758889.1_S2	G707	8	-6.26031	-3.12876
MT758890.1_S3	G707	9	8.84928	1.3078
MT758891.1_S4	G707	10	-4.08003	8.25741
MT759474.1_L1	G712	1	0.155371	-2.8892
MT759473.1_L2	G712	2	0.91757	-2.82085
MT759472.1_L3	G712	3	-1.57369	-0.910378
MT759475.1_M1	G712	4	-1.05054	0.309662
MT759476.1_M2	G712	5	-0.224238	-1.5323
MT759477.1_M3	G712	6	0.460159	-0.501478
MT759478.1_S1	G712	7	2.94362	1.83953
MT759479.1_S2	G712	8	-6.14842	-3.08056
MT759480.1_S3	G712	9	8.71158	1.43289
MT759481.1_S4	G712	10	-4.14879	8.13337
MT778939.1_L1	G722	1	-0.0154247	-2.88413
MT778938.1_L2	G722	2	0.840009	-2.85648
MT778937.1_L3	G722	3	-1.54144	-0.894637
MT778940.1_M1	G722	4	-1.00632	0.227339
MT778941.1_M2	G722	5	-0.0940563	-1.56776
MT778942.1_M3	G722	6	0.54543	-0.411853
MT778943.1_S1	G722	7	2.79115	1.61981
MT778944.1_S2	G722	8	-6.20018	-2.85438
MT778945.1_S3	G722	9	8.84928	1.3078
MT778946.1_S4	G722	10	-4.08003	8.25741
MT759504.1_L1	G725	1	-0.0682429	-2.89164
MT759503.1_L2	G725	2	0.824493	-2.73896
MT759502.1_L3	G725	3	-1.57471	-1.01987
MT759505.1_M1	G725	4	-1.11704	0.343524
MT759506.1_M2	G725	5	-0.0541858	-1.1068
MT759507.1_M3	G725	6	0.373223	-0.547609
MT759508.1_S1	G725	7	2.92974	1.93605
MT759509.1_S2	G725	8	-6.26031	-3.12876
MT759510.1_S3	G725	9	8.84928	1.3078
MT759511.1_S4	G725	10	-4.08003	8.25741
MK675862.1_L1	NOR-1988	1	0.302154	-2.64492
MK675863.1_L2	NOR-1988	2	0.909714	-2.90216
MK675864.1_L3	NOR-1988	3	-1.98636	-1.25766
MK675865.1_M1	NOR-1988	4	-1.18722	1.00725
MK675866.1_M2	NOR-1988	5	-0.162953	-1.1907
MK675867.1_M3	NOR-1988	6	0.259388	-0.387406
MK675868.1_S1	NOR-1988	7	2.89333	1.85608
MK675869.1_S2	NOR-1988	8	-5.46724	-3.51771
MK675870.1_S3	NOR-1988	9	8.87922	0.792035
MK675871.1_S4	NOR-1988	10	-3.80703	9.10204
MK675842.1_L1	NOR-2015/MS	1	0.326741	-2.64886
MK675843.1_L2	NOR-2015/MS	2	0.991594	-3.1595
MK675844.1_L3	NOR-2015/MS	3	-1.7977	-1.09412
MK675845.1_M1	NOR-2015/MS	4	-1.15541	0.547054
MK675846.1_M2	NOR-2015/MS	5	-0.4252	-2.01245
MK675847.1_M3	NOR-2015/MS	6	0.331526	-0.463933
MK675848.1_S1	NOR-2015/MS	7	2.67601	1.00162
MK675849.1_S2	NOR-2015/MS	8	-4.88579	-2.78493
MK675850.1_S3	NOR-2015/MS	9	8.73	1.6704
MK675851.1_S4	NOR-2015/MS	10	-4.54453	7.59698
MT759554.1_L1	S1003	1	-0.117492	-2.78473
MT759553.1_L2	S1003	2	0.934315	-2.81522
MT759552.1_L3	S1003	3	-1.48484	-0.961689
MT759555.1_M1	S1003	4	-1.18783	0.168754
MT759556.1_M2	S1003	5	-0.0478619	-1.61807
MT759557.1_M3	S1003	6	0.654022	-0.45167
MT759558.1_S1	S1003	7	2.92293	1.93118
MT759559.1_S2	S1003	8	-6.21987	-2.83994
MT759560.1_S3	S1003	9	8.84928	1.3078
MT759561.1_S4	S1003	10	-4.14879	8.13337
MT759564.1_L1	S1053	1	-0.117492	-2.78473
MT759563.1_L2	S1053	2	0.846252	-2.83762
MT759562.1_L3	S1053	3	-1.50585	-1.00702
MT759565.1_M1	S1053	4	-1.0127	-0.0101723
MT759566.1_M2	S1053	5	-0.0478619	-1.61807
MT759567.1_M3	S1053	6	0.550602	-0.430693
MT759568.1_S1	S1053	7	2.92293	1.93118
MT759569.1_S2	S1053	8	-6.3095	-2.91815
MT759570.1_S3	S1053	9	8.845	1.19332
MT759571.1_S4	S1053	10	-4.23235	7.93591
KC715681.1_L1	VT06062012-358	1	0.135247	-2.85391
KC715680.1_L2	VT06062012-358	2	1.00293	-2.92677
KC715679.1_L3	VT06062012-358	3	-1.71562	-1.16396
KC715682.1_M1	VT06062012-358	4	-1.07898	0.474833
KC715683.1_M2	VT06062012-358	5	-0.105609	-0.950707
KC715684.1_M3	VT06062012-358	6	0.379736	-0.494742
KC473453.1_S1	VT06062012-358	7	2.45111	1.70115
KC715685.1_S2	VT06062012-358	8	-6.1033	-3.03519
KC715686.1_S3	VT06062012-358	9	8.58622	1.34231
KC715687.1_S4	VT06062012-358	10	-4.14879	8.13337
KC776258.1_L1	VT06202012-371	1	0.193876	-2.81439
KC776257.1_L2	VT06202012-371	2	0.755787	-2.72137
KC776256.1_L3	VT06202012-371	3	-1.64152	-1.09104
KC776259.1_M1	VT06202012-371	4	-1.09368	0.471552
KC776260.1_M2	VT06202012-371	5	-0.0230475	-1.00925
KC776261.1_M3	VT06202012-371	6	0.438581	-0.485445
KC473454.1_S1	VT06202012-371	7	3.0746	1.86663
KC776262.1_S2	VT06202012-371	8	-6.15355	-3.31577
KC776263.1_S3	VT06202012-371	9	9.01011	1.59834
KC776264.1_S4	VT06202012-371	10	-4.71953	8.31097
MW354788.1_L1	mDa115	1	0.107779	-2.81488
MW354800.1_L2	mDa115	2	1.01893	-3.06519
MW354812.1_L3	mDa115	3	-1.66982	-0.993089
MW354824.1_M1	mDa115	4	-1.19003	0.440173
MW354836.1_M2	mDa115	5	-0.425242	-2.04314
MW354848.1_M3	mDa115	6	0.282269	-0.338643
MW354860.1_S1	mDa115	7	2.67601	1.00162
MW354872.1_S2	mDa115	8	-4.79904	-2.5816
MW354884.1_S3	mDa115	9	8.0029	0.957714
MW354896.1_S4	mDa115	10	-4.54453	7.59698
MW354790.1_L1	mGl118	1	0.106542	-2.48557
MW354802.1_L2	mGl118	2	0.815674	-2.95222
MW354814.1_L3	mGl118	3	-1.50094	-1.20493
MW354826.1_M1	mGl118	4	-1.55833	0.301096
MW354838.1_M2	mGl118	5	-0.305785	-2.05906
MW354850.1_M3	mGl118	6	0.472393	-0.777735
MW354862.1_S1	mGl118	7	2.67601	1.00162
MW354874.1_S2	mGl118	8	-5.51893	-3.2836
MW354886.1_S3	mGl118	9	8.45666	0.865345
MW354898.1_S4	mGl118	10	-4.46679	7.66886

## Sheet: RSCU PCA Loadings
Codon loadings for the first two RSCU principal components.
Codon	PC1 Loading	PC2 Loading
TTT	0.100258	-0.0391312
TTC	-0.100258	0.0391312
TTA	0.0136788	-0.223165
TTG	-0.0140922	-0.177936
TCT	0.0736584	-0.247188
TCC	0.0766483	0.111117
TCA	-0.0254639	0.11941
TCG	0.140193	-0.119122
TAT	0.0552634	0.188003
TAC	-0.0552634	-0.188003
TGT	0.192523	-0.134434
TGC	-0.192523	0.134434
CTT	0.0392115	0.0925809
CTC	0.0373512	0.025348
CTA	-0.109784	-0.195809
CTG	-0.00473811	0.198888
CCT	0.119435	0.0773029
CCC	0.141566	-0.176186
CCA	-0.187517	0.0012275
CCG	-0.172236	0.108273
CAT	-0.189418	-0.0292564
CAC	0.189418	0.0292564
CAA	-0.0882899	0.080204
CAG	0.0882899	-0.080204
CGT	0.216038	-0.107686
CGC	-0.142149	0.177159
CGA	-0.104315	-0.046605
CGG	-0.203251	0.0951615
ATT	-0.196567	-0.0400949
ATC	0.198099	0.111695
ATA	0.00589795	-0.10908
ACT	0.191713	0.0299775
ACC	-0.0631708	-0.113189
ACA	-0.0947515	0.0417768
ACG	-0.0483947	0.07076
AAT	-0.000168241	-0.0414465
AAC	0.000168241	0.0414465
AAA	0.25322	0.0296498
AAG	-0.25322	-0.0296498
AGT	-0.171979	-0.198477
AGC	-0.115133	0.230919
AGA	-0.155931	-0.09813
AGG	-0.0416677	0.164321
GTT	0.05752	0.0724146
GTC	-0.0980423	-0.229695
GTA	-0.0707566	-0.0469295
GTG	0.106003	0.244527
GCT	-0.153221	-0.0671691
GCC	0.166497	0.0554305
GCA	0.114587	-0.140662
GCG	-0.0385711	0.156846
GAT	-0.0805927	-0.248778
GAC	0.0805927	0.248778
GAA	0.161283	0.0535389
GAG	-0.161283	-0.0535389
GGT	0.148236	-0.0688718
GGC	0.0294996	-0.0481452
GGA	-0.154045	0.10544
GGG	-0.115909	0.0381148

## Sheet: RSCU Sensitivity
Standardized 59-codon RSCU segment analysis for all segments, excluding S1/S4, and for L/M segments only.
Analysis	N CDS	N Segments	PC1 Explained Percent	PC2 Explained Percent	Segment R2 Standardized RSCU	Blocked Permutation P
all_10_segments	720	10	24.5171	17.2158	0.982159	0.0001
exclude_two_shortest_S1_and_S4	576	8	31.0466	17.2047	0.97988	0.0001
L_and_M_segments_only	432	6	29.6703	25.1001	0.96858	0.0001

## Sheet: Host Sensitivity
Segment means computed separately with Atlantic and Chinook salmon RefSeq CDS references.
Segment	Atlantic CAI	Chinook CAI	Atlantic RCDI	Chinook RCDI	Atlantic D	Chinook D
1	0.552883	0.553105	1.43054	1.42913	0.088669	0.0885389
2	0.553568	0.553681	1.46137	1.46114	0.0896561	0.0895568
3	0.55336	0.553369	1.39065	1.38986	0.0780584	0.0779736
4	0.596526	0.596868	1.26734	1.26616	0.0538245	0.0536575
5	0.5923	0.591971	1.28029	1.28073	0.0520542	0.0523436
6	0.596261	0.595643	1.32456	1.32567	0.0577254	0.0578992
7	0.591007	0.591313	1.40828	1.40724	0.0827405	0.082712
8	0.553623	0.553617	1.39265	1.39092	0.0980109	0.0977148
9	0.590703	0.591298	1.50217	1.5021	0.102839	0.102918
10	0.585597	0.585462	1.44314	1.44451	0.0763126	0.0761267

[truncated: 9 more sheets: Redundancy Tests 995, Redundancy Clusters 995, Redundancy Tests 990, Redundancy Clusters 990, ENc GC3s Diagnostics, ENc GC3s Summary, Host Rank Stability, CDS Metrics, Metric Definitions]
